# Supplementary material for: Switch-like and persistent memory formation in individual Drosophila larvae
Source: eLife. 2021 Oct 12;10:e70317. doi: 10.7554/eLife.70317 (PMC8510578; doi:10.7554/eLife.70317)
Supplement: Figure 1—source data 1. [file elife-70317-fig1-data1.xlsx]

## Sheet: Gr63a1
	Figure 1
	Male parent: Gr63a1; Female Parent: Gr63a1
	Training protocol: No Training
Number	Animal ID	Apparatus	File Path	Naive decision sequence
1	20201028-B-1	B	Figure 1 / Gr63a1 / 1	CAACCCAAAACACCCCCAAACCCCCAACAAACAAAACCCACCCAACACCCA
2	20201028-B-2	B	Figure 1 / Gr63a1 / 2	CAACCAAAACACAAACCAC
3	20201028-C-1	C	Figure 1 / Gr63a1 / 3	ACCACCAACACCACACCAAACCAAAAACCCAACACCACCAACACACACCCCACACCCAAAACCAACACCCCACACAAAAAC
4	20201028-C-2	C	Figure 1 / Gr63a1 / 4	AAAACCAAAACCAAACCCACACCCCCAACCAACAAC
5	20201028-D-1	D	Figure 1 / Gr63a1 / 5	ACAACCACCCAACACCACAACACCCA
6	20201028-E-1	E	Figure 1 / Gr63a1 / 6	CCACACACACAAACCACCCCAAACAAAAAAACC
7	20201028-E-2	E	Figure 1 / Gr63a1 / 7	AACCAAAAACCACCCACCC
8	20201028-F-1	F	Figure 1 / Gr63a1 / 8	AACACCACCCCCCCCCAAAAACAAACCCAC
9	20201028-G-1	G	Figure 1 / Gr63a1 / 9	CCCCCACAACACCAACCAACCCAAACCCACCCAACCC
10	20201028-G-2	G	Figure 1 / Gr63a1 / 10	AAAACACCAAACCCCCACCACAC
11	20201028-H-1	H	Figure 1 / Gr63a1 / 11	ACAACACAACCACC
12	20201029-B-1	B	Figure 1 / Gr63a1 / 12	ACACCCCAAACCCACAAACACCCAA
13	20201029-B-2	B	Figure 1 / Gr63a1 / 13	ACACCCACCCAAAACCACCCCACAAACAACACCACCCAACAACCCACCACACAAAC
14	20201029-B-3	B	Figure 1 / Gr63a1 / 14	ACCCAACAAACCAACCA
15	20201029-C-1	C	Figure 1 / Gr63a1 / 15	ACCCCAACCACCCCACCACCCAACCCAACAAACACCCAC
16	20201029-C-2	C	Figure 1 / Gr63a1 / 16	CACACAACAACAACACCAAAACAACCAACAAAACCAAAACAAAACCAAACCAAACC
17	20201029-C-3	C	Figure 1 / Gr63a1 / 17	ACAACCAACAACCCCAAACCCCCACCCACACACACCCCCAAACCCACACCC
18	20201029-D-1	D	Figure 1 / Gr63a1 / 18	ACCACAACACCCCACACAACAACCCCAACCAAA
19	20201029-D-2	D	Figure 1 / Gr63a1 / 19	ACCACCAACCAC
20	20201029-D-3	D	Figure 1 / Gr63a1 / 20	CACCCAAACCCAAACAAA
21	20201029-E-1	E	Figure 1 / Gr63a1 / 21	CCAAAACAACCAAAAAACCCCCCCCCACCACA
22	20201029-E-2	E	Figure 1 / Gr63a1 / 22	CCACAAACCCAACAACCCAAAACACACACCCCCAACCAACAAAACCCCAA
23	20201029-E-3	E	Figure 1 / Gr63a1 / 23	CACCACCCACAAA
24	20201029-F-1	F	Figure 1 / Gr63a1 / 24	CACCAAACCACACC
25	20201029-F-2	F	Figure 1 / Gr63a1 / 25	CAAAAACAACCCACACCCAACCCCCCCAACAAAACAACACCCCAAACA
26	20201029-G-1	G	Figure 1 / Gr63a1 / 26	ACCCCCAACCCAACCCCACAACCAAACAAACCCAACAACAAAAACCCCCAACACCC
27	20201029-G-2	G	Figure 1 / Gr63a1 / 27	CCCAACCCACCCAAAACACACCAACCCCCACCAC
28	20201029-G-3	G	Figure 1 / Gr63a1 / 28	ACCAACCACCCACACACCACACCCACAACAC
29	20201029-H-1	H	Figure 1 / Gr63a1 / 29	CACAACACCAACACAACCACAAACACACCACAACCACCCCAACCCAACCCACC
30	20201029-H-2	H	Figure 1 / Gr63a1 / 30	ACACCAAACCAACCACAAACCAAACAACACAAA
31	20201029-H-3	H	Figure 1 / Gr63a1 / 31	AAACCCACCACCAACCAACCAACCA
32	20201030-B-1	B	Figure 1 / Gr63a1 / 32	AACACCCAACCAAACCAAACACACCCCAAACCCAACCACCAAAACACACCAACCACCCCCCCCCCCCACCC
33	20201030-B-2	B	Figure 1 / Gr63a1 / 33	CCCCACCACCCCACCACACCACACAACCCCCAAACCCACACCCAACAA
34	20201030-C-1	C	Figure 1 / Gr63a1 / 34	ACCACCCAAAAACCACACACCACCCACACAACACCCCACAAACCAAAAAAC
35	20201030-C-2	C	Figure 1 / Gr63a1 / 35	CCCCACCACCCACAACCAAACC
36	20201030-D-1	D	Figure 1 / Gr63a1 / 36	CAACCCACCAAAACCCAAAACCCAACCAACAACCAACACC
37	20201030-D-2	D	Figure 1 / Gr63a1 / 37	ACACACACACCAACCCAACCACACCCCA
38	20201030-E-1	E	Figure 1 / Gr63a1 / 38	AACACAACCCCCCAACCCAAAAAAAACACACAAAAAAACACCCAAACACAACCCACAACAAAAACC
39	20201030-E-2	E	Figure 1 / Gr63a1 / 39	AAACAACCCAACACACCACCCCAAACCCCAACACCCCACACAACCCAA
40	20201030-F-1	F	Figure 1 / Gr63a1 / 40	CACCCAACCAC
41	20201030-G-1	G	Figure 1 / Gr63a1 / 41	CCCCACCACCACCCCCACAAAACAACCACCCCAAAACCCACCACACCCAACAAACACCCCC
42	20201030-G-2	G	Figure 1 / Gr63a1 / 42	CCCACCAAACAAAACCACCCCAACCAAC
43	20201030-H-1	H	Figure 1 / Gr63a1 / 43	AAAACCAACCACCCACCAAAACCAA
44	20201030-H-2	H	Figure 1 / Gr63a1 / 44	AACCCCACAACA

## Sheet: Naive, ATR+
Figure 1
Male parent: SS00864-Gal4; Female Parent: UAS-CsChrimson
Training protocol: No Training
Note: The Naive, ATR+ group includes the naive decision sequence for animals from the following groups: Paired (Number 1 - 64), Reverse Paired (Number 65 - 93), No Training (Number 94 - 143), and DAN without CO2 (144 - 159). See corresponding spreadsheets in this file.
Animal ID	Apparatus	File Path	Naive decision sequence
20200618-B-1	B	Figure 1 / Paired / 1	AACAAACA
20200618-C-1	C	Figure 1 / Paired / 2	AAAA
20200618-D-1	D	Figure 1 / Paired / 3	CACAA
20200618-E-1	E	Figure 1 / Paired / 4	AAACAACAAAAA
20200618-G-1	G	Figure 1 / Paired / 5	CAAACACAAAAACAAA
20200708-B-1	B	Figure 1 / Paired / 6	AAAAACCAAAAC
20200708-D-1	D	Figure 1 / Paired / 7	AAACAAAAAACA
20200708-E-1	E	Figure 1 / Paired / 8	AAAAAAACCCAAAACA
20200708-E-2	E	Figure 1 / Paired / 9	AAAACACAACACAAA
20200708-F-1	F	Figure 1 / Paired / 10	AAAAAAA
20200708-F-2	F	Figure 1 / Paired / 11	AAACACCAAAAACCCAAAAAA
20200708-G-1	G	Figure 1 / Paired / 12	AACAAAACA
20200708-H-1	H	Figure 1 / Paired / 13	AAAAACCAAAA
20200720-B-1	B	Figure 1 / Paired / 14	AAAAAAAACACCAACAAAAACAACACCAAAC
20200720-B-2	B	Figure 1 / Paired / 15	AAAAAAAAACAACAAC
20200720-C-1	C	Figure 1 / Paired / 16	AAAACACCAACAAAAACAACACCAAAAAACCCACACACAAAAAACAAAAAACCAACAA
20200720-C-2	C	Figure 1 / Paired / 17	AAAACCAA
20200720-E-1	E	Figure 1 / Paired / 18	AAAAAAAAA
20200720-E-2	E	Figure 1 / Paired / 19	ACAAACACAACCACAAAAAAA
20200720-G-1	G	Figure 1 / Paired / 20	CAAAA
20200720-H-1	H	Figure 1 / Paired / 21	ACAAAAAAAAAACAACAA
20200720-H-2	H	Figure 1 / Paired / 22	AACACAAACCAAAAAAAC
20200811-B-1	B	Figure 1 / Paired / 23	AAAAAACAAACAAAACAAAAAAACAAACAACCAAAAAAAACAAACCACAAAAAA
20200811-C-1	C	Figure 1 / Paired / 24	AAAAAACCAAACAAAA
20200811-C-2	C	Figure 1 / Paired / 25	AAAAAAAAACACCAACA
20200811-D-1	D	Figure 1 / Paired / 26	AAACAAAAACAACAAAAAACCAAACCAACAAAACCAAAAAA
20200811-D-2	D	Figure 1 / Paired / 27	AAAAACAAAACACAAA
20200811-E-1	E	Figure 1 / Paired / 28	AAAACAAAACAAACAACAAACA
20200812-B-1	B	Figure 1 / Paired / 29	AAAAAACCAAAAACCAAAAAA
20200812-C-2	C	Figure 1 / Paired / 30	AAAAAACAAACAAACAACCACAAAAAAACCACACAAAACACAAAACAAAAAAA
20200812-D-2	D	Figure 1 / Paired / 31	AAACAAAAACACAACACCAAACACACACAAAAAACAAAAACAAAACAAAACCACAAACACCAAACAAAAAAAAA
20200812-G-1	G	Figure 1 / Paired / 32	ACAACACAAAAACAACCACAAAACAACAAAAAAAACAAACAAACACAAAAAA
20200910-B-1	B	Figure 1 / Paired / 33	AAAAACAACAACAAACAAAAAC
20200910-B-2	B	Figure 1 / Paired / 34	AAACAAAA
20200910-F-1	F	Figure 1 / Paired / 35	AAAAACACACCAAAAAAACAAAAACAA
20200910-H-1	H	Figure 1 / Paired / 36	AAAAACAACAAAAC
20200929-B-1	B	Figure 1 / Paired / 37	AAAAAACAAAAAAACAACACACAAAAAAAACAAAAA
20200929-B-2	B	Figure 1 / Paired / 38	AACACAAAAAAACCCACACAAAAAAAACCAAAAAAAAACCCAACAACAAAA
20200929-C-1	C	Figure 1 / Paired / 39	AAAAAACACAAACCAAAAAAAACAACAAACAAAAAAAAAACACAAACAA
20200929-D-1	D	Figure 1 / Paired / 40	AACAAAACAACACACAACAAAAAAAAAACAAAAACACAAAAAACAACCAAAAAACCACAAAAAAAAAAAA
20200929-D-2	D	Figure 1 / Paired / 41	CAAAAAAAACAACCAAAA
20200929-E-1	E	Figure 1 / Paired / 42	AAAACAAAACAACAAACAAACAAACACAAACACCAAAACAAAAACCACAAAAACCCAA
20200929-F-1	F	Figure 1 / Paired / 43	AAAAACCAAAAAACCAAAACACAAACA
20200929-G-1	G	Figure 1 / Paired / 44	AAAACCAACAAAAAAACACAAAAACACCAAAACAACAAAAAACAA
20200929-H-1	H	Figure 1 / Paired / 45	AAAACACACACCCAAAAACAACAAAAAAACAACAAAACAAAAAACACCAAAAAAAAACAAAAACCAAACAAAAA
20200930-B-1	B	Figure 1 / Paired / 46	AACACAAAAAACAAAACACCCACAAACAAACAAAAACAAACAACAAAAACCACCACAAAAAACAAAAA
20200930-C-1	C	Figure 1 / Paired / 47	AAAACAACAAAAAAACACAAAACACAAAACCAAACCAAAACAAAAAACAAAACAAAACACAAAAAACAAAAAACACAACAA
20200930-D-1	D	Figure 1 / Paired / 48	ACAAACAAAAAAAAAAAAACCAAACCAAAAACCAAAAACAAACACCAAAAACAACCAACACCACAAAC
20200930-E-1	E	Figure 1 / Paired / 49	AAAACAACAAAAAACAAAAAACAAAAACAACAAAAAAACAAAAAACAAAACAAAACAACAACAACCAACAAAAACACAA
20200930-F-1	F	Figure 1 / Paired / 50	ACCAAAAAAAACCAAACAAAAAAACA
20200930-G-1	G	Figure 1 / Paired / 51	AAAAAAACACACCAAAAAAACAAACACCCCAACAAAAAACAAAACAAAACACAAAACCAAAAAAAAACAACCAAACACAA
20200930-H-1	H	Figure 1 / Paired / 52	ACAAACAAAAAAAACCAAAAAAAAAAACACCAAAAAAAACAAACCAACAAAACAAAAAACAAAACACCACAAAACCACAAAAAA
20200930-H-2	H	Figure 1 / Paired / 53	CAAACAAAAAAAAACAAACAAACCACAAAACAAAACCACACAAAAAACAAACAAAACCACAAAAAACACACAACAACAACAAAAAACCAAAAAAA
20201001-B-1	B	Figure 1 / Paired / 54	AAAAAAAACCAAAAAAAAACACCAACCAAAACAAAAAACACAAAAACAAACACAAAACCAAAAACAAAAAAACAAAACACCAAAAAACACACCAAAAA
20201001-C-1	C	Figure 1 / Paired / 55	AAAAACACAAAAACAAAAAAAAAACCAA
20201001-C-2	C	Figure 1 / Paired / 56	CAAAAACAAAAACCAAACACACAAA
20201001-D-1	D	Figure 1 / Paired / 57	AAAAACAACAAAAAAACCAAACAAAAACAACAAAACACAAAAAACACACAACCAAAAAAAACAAAA
20201001-D-2	D	Figure 1 / Paired / 58	AAACACAAAAACAAA
20201001-E-1	E	Figure 1 / Paired / 59	CAAAAAAACCAACAAAACAAAA
20201001-F-1	F	Figure 1 / Paired / 60	AAAACACAAAAAAACAAACAAAAACACCAA
20201001-G-1	G	Figure 1 / Paired / 61	AACAAAACACAACAACCAAACAAAAAAA
20201001-G-2	G	Figure 1 / Paired / 62	AAAAACAAAACAACAAAAAACACAAAACAAAAACAAAAACACCAAAAACCCAAAAACCAAAAAACCAAAACAAAACAAAAC
20201001-H-1	H	Figure 1 / Paired / 63	ACAACACACAAAAAAAAACAAAAAAACCAAAAACACCAAAAAACCAAAAACCAAACAAAACAAAAAA
20201001-H-2	H	Figure 1 / Paired / 64	CAAAAAAAAAACAAAAAAAACCACACACAAAAAACAAAAAAAAAAACAAACACAACAAAAAAACACCAACAAACCAACCACAA
20200805-B-1	B	Figure 1 / Reverse Paired / 1	AAAAAAAAAAAACCACAAAAACA
20200805-C-1	C	Figure 1 / Reverse Paired / 2	AACAACAAAAAACCAAAAAAA
20200805-C-2	C	Figure 1 / Reverse Paired / 3	ACAAACAAA
20200805-D-1	D	Figure 1 / Reverse Paired / 4	AAAAAACCACAACAAAACAACCAACAAAAACAAACAAAACAA
20200805-E-1	E	Figure 1 / Reverse Paired / 5	AAAAAACACAAAA
20200805-F-1	F	Figure 1 / Reverse Paired / 6	CAAAAAAACAA
20200805-H-1	H	Figure 1 / Reverse Paired / 7	AAAAACA
20200805-H-2	H	Figure 1 / Reverse Paired / 8	AAAAACCAACAAACCAAACCAAAA
20201014-B-2	B	Figure 1 / Reverse Paired / 9	CAAAAAAACAAAACAAACAACCACAAAAAAAAACAAAACCACCAAAACACAAACACAAAACACCAAC
20201014-D-2	D	Figure 1 / Reverse Paired / 10	CAAAAAAACAACCACAAAACAAAAAAAACCA
20201014-F-2	F	Figure 1 / Reverse Paired / 11	CAAAACAAACAAAAACAAACAAA
20201014-G-2	G	Figure 1 / Reverse Paired / 12	AAAAAACAACAACAACACAACAACAAAAACAA
20201015-B-1	B	Figure 1 / Reverse Paired / 13	AAAAACAAAAACAAAAAAACAAAAAAAAACAACACCAAAAACCAAAAAAAAAACCAAAAACAACCAACCACCCCCAAACCAACCCACAAACCAACACAACCAACAACAACAAAAAAAACAACACAAACAAAA
20201015-B-2	B	Figure 1 / Reverse Paired / 14	AAAAAAACCAAAACAAAAACACAAAAACCAACAAACAAACACACAAAAA
20201015-C-1	C	Figure 1 / Reverse Paired / 15	AAAAAAACCAACAAAACACCAAAAAACAACAAAACAAAAAAAACACAAACAAA
20201015-C-2	C	Figure 1 / Reverse Paired / 16	AAACAAAAAACAAACAAAACACAAAAAAAA
20201015-C-2	C	Figure 1 / Reverse Paired / 17	CAAACAAAAAACAACAAAAAACAAAAAACAACAAAAAAACAAACACAAA
20201015-D-1	D	Figure 1 / Reverse Paired / 18	CAAAAAAAACAACAACACAAAAAAAAAACAAAAA
20201015-D-2	D	Figure 1 / Reverse Paired / 19	AAAAACACAAACACAAAACACAAAAAAAACAAAAAAACCCCCAAAACAACAAAAAACAAACACA
20201015-E-1	E	Figure 1 / Reverse Paired / 20	ACAAAAAACAACAAAACAAAAACCACACAA
20201015-E-2	E	Figure 1 / Reverse Paired / 21	AAAAACAAAACAACAAACAAAAAACAAAAAAACAAAAAACACAACAAAAAACAACACCAACAAAAAAAA
20201015-E-2	E	Figure 1 / Reverse Paired / 22	AAAAAACCAAAAAAAAACACAAAAACAAAACAACACAAAAAAAAACAAAAAACACAAAAAAACAAAAACACCAAAAAAAAAAAAACAAAAAAACC
20201015-F-1	F	Figure 1 / Reverse Paired / 23	AAAAAAACAAAAAAACACACAACAAAAAAAAAAACAAAAACAAAACC
20201015-F-2	F	Figure 1 / Reverse Paired / 24	CAAAAAACAAAAAAACAAAAAAACACAACAAAAACAA
20201015-G-1	G	Figure 1 / Reverse Paired / 25	CAAAACAAAAAAAACAAAACAAAAACACAAACAACAAAAAAAACAAAAAAACACCACAAACAAAAAAAACACACCAAAAAACCAAAAAACAAAAAACAAAAAAACCACCAA
20201015-G-2	G	Figure 1 / Reverse Paired / 26	AAAACAAAACCAAAAAACAACAAAAACAAAAAAAACAAACAAAAAAAACCACC
20201015-H-1	H	Figure 1 / Reverse Paired / 27	AAAACCAAAAAAAAACAACAACAAACAAAAAA
20201015-H-2	H	Figure 1 / Reverse Paired / 28	AAAAAAAACAAACACAAAAAAAACACAAACAAA
20201015-H-2	H	Figure 1 / Reverse Paired / 29	AAAACACAAAACCACACAAAAAAACAAAACAACAAAAAACAAAAAACACAAAACCACACCACAAAAAAAAACAACCCCAACAAAAAAACAACAACACACAACAAAAACCAAAACAA
20200727-B-1	B	Figure 1 / No Training / 1	AAAAACAAACAAAACAA
20200727-B-2	B	Figure 1 / No Training / 2	AACCACAAAAAAAACAAACCAACACCAAACACAAACAACCCAAAACCCAAACACCCACAACCAAA
20200727-C-2	C	Figure 1 / No Training / 3	AAAAAAAACCCACAAACCAAACCAACCAAA
20200727-D-1	D	Figure 1 / No Training / 4	AAAAAAACCAAACAAAAAACAAACCAACAAACACAACCCAAAA
20200727-D-2	D	Figure 1 / No Training / 5	AAAAAAACAAACAAACACAACCCACAAAAACAACAAAACAAAACCAACACAAAAAAAAAAACAACACCCAAAAACAAA
20200727-E-1	E	Figure 1 / No Training / 6	AAAAACAACA
20200727-G-1	G	Figure 1 / No Training / 7	AACAAAACAAC
20200727-H-1	H	Figure 1 / No Training / 8	AAAACACACACAAAAACAC
20200728-B-1	B	Figure 1 / No Training / 9	AAAAAACCAACACAAAACAA
20200728-B-2	B	Figure 1 / No Training / 10	ACACAAAACACCAAAACAAACAAAAAACCCAAAAAACCAA
20200728-C-1	C	Figure 1 / No Training / 11	AAAAAAAAACAACAAAACAAAACAAAAACCACCAACAACACAACAAA
20200728-C-2	C	Figure 1 / No Training / 12	AAAAAAAACCAACACCACCAAAAAACAACAAACACACACACACCAAACCCAAACAAAAAAACACAACCAACCAACCAAAACAAAA
20200728-D-1	D	Figure 1 / No Training / 13	AAAAAAACACA
20200728-D-2	D	Figure 1 / No Training / 14	ACAAAAACAAACAAACAACAACACACAAAACAAAACCAACACAAAAA
20200728-E-1	E	Figure 1 / No Training / 15	AAAACAA
20200728-F-1	F	Figure 1 / No Training / 16	AAAAA
20200728-F-2	F	Figure 1 / No Training / 17	AAAACAACACCACACAAACCAAAAAACACAAAACCACCAAAAAACAAAAAAACC
20200728-H-1	H	Figure 1 / No Training / 18	AAAACAACAAAAACAAAACCAAAAAAAA
20200811-B-1-0	B	Figure 1 / No Training / 19	AAAAAACAAAACCAACACAAAAA
20200811-E-1-0	E	Figure 1 / No Training / 20	AAAACAACAACCAAAACAAA
20200811-F-1	F	Figure 1 / No Training / 21	AAAAAAAAACACCAAACCAAAA
20200811-G-1	G	Figure 1 / No Training / 22	CAAAAAAAAACACCAACACAAAAAAAC
20200811-G-2	G	Figure 1 / No Training / 23	AAAAACAAAAC
20200811-H-1	H	Figure 1 / No Training / 24	AAAAAAAAA
20200812-E-2	E	Figure 1 / No Training / 25	AACACAAAAAACAACACAAAAACCAACCAAAAA
20200812-F-2	F	Figure 1 / No Training / 26	AAAAAACAACAA
20200812-H-1	H	Figure 1 / No Training / 27	AAAAACAACAAAAAC
20200813-G-1	G	Figure 1 / No Training / 28	ACCAAAAAAACACAAAAAAAAAAACAAACCACAACCAAAAAAACAACAAACAAACCAAAACCAACAAAAAAAAACAAAAAAAAACCACAAAAAAACAACAACCCAAAAAAAAACACA
20200813-G-2	G	Figure 1 / No Training / 29	AAAACCAAAACAAACAAAAAACA
20200911-H-1	H	Figure 1 / No Training / 30	AAAACAAAAAACCACCAACACAACAAAACAACAACAAAACAAA
20201008-B-2	B	Figure 1 / No Training / 31	AAACAAAACAAAAAAAACAACAAAAACAAAAAAACAAAACAAAAAACAAAACACAAAACAAAAACCACAACCCAAAACAAAAAACACAAAACAAACAAACACCAAACACAACCAACACACACCCAAACAACACAACCACACAACCAA
20201008-D-2	D	Figure 1 / No Training / 32	AACACAAAAACAAAACCAACAAAAAACCAAAAAACCAAAAAAACCAAAAAAACACACAAAAACCCAACAAACAAAAAACAACCAAAAAA
20201008-E-2	E	Figure 1 / No Training / 33	AACAAACAAAACAACAAAAAAAACACAAACAAAACAAAAAA
20201008-F-2	F	Figure 1 / No Training / 34	AAAACAAAAACAAAAAACAAAAACCAAAAAACACAAAAACACCAAAACAAACAACAAAAAACAACCACAAAAAAACCAAAAACAACACAAAA
20201008-G-2	G	Figure 1 / No Training / 35	CAACCCAACAAACAAAAAAAAAAAACCAAAACAAAACACAAAAAAACACAAAACAAAA
20201008-H-2	H	Figure 1 / No Training / 36	AACAAAACAAACAAAAAAAACCAAAAACAAAAAACAAACAACAAACACAAAAAAACAAACAAAAAAACACAAA
20201009-B-1	B	Figure 1 / No Training / 37	AAAAAAAACAACAAAAACCAAAAACAAAACCAACCCACAAAAACAACAAACACAAAACCACAAAAAACAAAACACAAACCCAAAAACACACACAAAAA
20201009-C-1	C	Figure 1 / No Training / 38	CAAAAAACAACAAAAACAACAAACAAAAAACACAAAACAAAAC
20201009-D-1	D	Figure 1 / No Training / 39	AAACAAAACAAACCAAAACAAACAACAAAACAAAACCAAAACAAAACACACACAAAAAAAACAAACAACA
20201009-E-1	E	Figure 1 / No Training / 40	CAAAAAAAACCAACACAAACCACACAAAAAAAACACAAAAAAACAACACCAAAAAAACACCAAAAAAAACCACACAAAAACCAAAAACCA
20201009-F-1	F	Figure 1 / No Training / 41	AAAAAACAACAAAAACCAACCAAA
20201009-G-1	G	Figure 1 / No Training / 42	ACAAAA
20201009-H-1	H	Figure 1 / No Training / 43	AACAAAAAACAAACACAAAAAACCAAAACAAAAACAA
20201010-B-1	B	Figure 1 / No Training / 44	AACAAAACCAAAAACACAACAAAAAAAAAACCAACCAAACAAACAACAAAAACACCACAAAAAAAAACAAAAAAACCCACCACA
20201010-C-1	C	Figure 1 / No Training / 45	AACAAAACAAAAACAAAAACCACCACCAAAAAAA
20201010-D-1	D	Figure 1 / No Training / 46	AACAACCAAAAAAACAAAACACAAAACAACACAAAAAAACCACACCAAAACAAACCCACAAAC
20201010-E-1	E	Figure 1 / No Training / 47	AAACAAACCAAACAAAACAAAAACACCAAACAAACCACAACCAACAACA
20201010-F-1	F	Figure 1 / No Training / 48	AAAACACCAAAACAAACCACACCACAAAACAAAAAAAAAAAAAACCCAAAAAACAAAACAAAAAACCAAAAAAAAA
20201010-G-1	G	Figure 1 / No Training / 49	ACAAAAACAAAA
20201010-H-1	H	Figure 1 / No Training / 50	AAAAACCAAAAAAACAACA
20210125-B-1	B	Figure 1 / DAN without CO2 / 1	AAACAAAACAACCAAACAACCACCAAACAACAAAAACACAAA
20210125-B-2	B	Figure 1 / DAN without CO2 / 2	AAAAACACCCAAAAAAAACCACACAACCACAAAAAACACAAAAAAAACAAAAAAAAAACACCCAAAACCCAAAACCCAAAAAAACAAAAAAAAAACACCACAACCCAAAAAACA
20210125-C-1	C	Figure 1 / DAN without CO2 / 3	ACAAAACAAACCAAA
20210125-C-2	C	Figure 1 / DAN without CO2 / 4	AAACCAAAAAAACCAACAAAACAAAAAAACAA
20210125-D-1	D	Figure 1 / DAN without CO2 / 5	CAAAAACCAAAAC
20210125-D-2	D	Figure 1 / DAN without CO2 / 6	CAAAACACAAACAACCAAAAACCAAAACCACCAAAACAAAAAACAAACCCACAACAAAAAAACAAAACCACAAAAAAAACAACCAAAACAA
20210125-E-1	E	Figure 1 / DAN without CO2 / 7	CCAAAAACCAACCAAAACAAAAACACCAACAAAACACCACCAAAAACCCAAAAAAAAAACAACCACCAA
20210125-E-2	E	Figure 1 / DAN without CO2 / 8	ACAAACAACAAAACACACCACACAAAAAAAAAAAAAACCAAACAACAACAAAAAACCAAACAACCCAAAAAAAACCACAAC
20210125-F-1	F	Figure 1 / DAN without CO2 / 9	ACAACCAACAAACACAAAAAAA
20210125-F-2	F	Figure 1 / DAN without CO2 / 10	ACCAACAAAAAACACAAAACAACACACAAAAAAAAACACCAAAACACAAAC
20210125-G-1	G	Figure 1 / DAN without CO2 / 11	CCACAAAAAACAAAACAAAACACAAAA
20210125-G-2	G	Figure 1 / DAN without CO2 / 12	AAAAAACAAACACAAAAAACCAAAAACAAAAACCAACCACCACAAAA
20210125-H-1	H	Figure 1 / DAN without CO2 / 13	CAAAAAACCCACAAACACACAAAAAAACACCAAAACACACCAA
20210125-H-2	H	Figure 1 / DAN without CO2 / 14	CAACACCAAAAACAACAAAAAAAAAAACACACACAAACCAAAAC
20210125-N-1	N	Figure 1 / DAN without CO2 / 15	ACAAAACAAACACCCAAAAACAACAAAACCCACAAACAAAAACCAAAAACAACCCAAACACAACACACCAAAAAACACAACCCAAAACAACC
20210125-N-2	N	Figure 1 / DAN without CO2 / 16	CAAAACACAAAACAACCAAAACAAAAAACCAAAAACAAACCCAAAAACACAAAAACAACACAAAAACCCCAAAA

## Sheet: Naive, ATR-
	Figure 1
	Male parent: SS00864-Gal4; Female Parent: UAS-CsChrimson
	Training protocol: No Training
	Note: The Naive, ATR- group includes the naive decision sequence for animals in the Paired, ATR- group.
Number	Animal ID	Apparatus	File Path	Naive decision sequence
1	20201203-B-1	B	Figure 1 / Paired, ATR- / 1	CCCAACCAAAAAACAACAAAAAACAACCACACAACAAAAAAACAAAACCAAAACCAAACAACAAACAACAACAACCCAAACACACAAAAAAAACACAAAAAAA
2	20201203-B-2	B	Figure 1 / Paired, ATR- / 2	AACCACAAAAAAAACCAAAACACACAACAAAACCAAAACAAAAACACCAAAAAAACACAAACCCAACAAAAACACAAAACA
3	20201203-C-1	C	Figure 1 / Paired, ATR- / 3	CACAAACCAACAAAAAAAAACCACCACAAAAAAAAAACAACACCACAACAACCAACAAAAAAAACCAAAACACACAAAAACACCAAAAACCAAAAACCAAACCAAAAAAAACCACACACAAAAAAAAACC
4	20201203-C-2	C	Figure 1 / Paired, ATR- / 4	ACCAAAAAAAACAAACAAAAAACCAACCCCAAAAAAACCAACAACCAAAAAACACCAAAAAAACCAACAAAACACAAACAACAAACCCAACCAAAAAAAACCACAACACAAAAAAACAA
5	20201203-D-1	D	Figure 1 / Paired, ATR- / 5	ACCAAACAAAAAAACAAAAAACACA
6	20201203-D-2	D	Figure 1 / Paired, ATR- / 6	ACCAAAAACAAAAAACCAAAAAC
7	20201203-E-1	E	Figure 1 / Paired, ATR- / 7	AAAAACAAAACAACACCCAACCAAAAAACACAAAACCAACAAAACCAAAACAAAACAACCACACAAAAA
8	20201203-E-2	E	Figure 1 / Paired, ATR- / 8	AAAACCAAAAACCAAAAAACAAACC
9	20201203-F-1	F	Figure 1 / Paired, ATR- / 9	ACAAAACA
10	20201203-F-2	F	Figure 1 / Paired, ATR- / 10	AAAAACAAAAAAAAAACACACACCCAACAAAAAAAACACACAAAAC
11	20201203-G-1	G	Figure 1 / Paired, ATR- / 11	AACCACAAAAACAAAACAAAAAAACCCAAAAACCA
12	20201203-G-2	G	Figure 1 / Paired, ATR- / 12	ACAAACAAACAAAACAAAACAAA
13	20201203-H-1	H	Figure 1 / Paired, ATR- / 13	ACA
14	20201203-H-2	H	Figure 1 / Paired, ATR- / 14	CAAACCAAACAAAAAACCCAAAAAAAACACAACCAACAACCACAAAACAAAACCAAAAC
15	20201203-N-1	N	Figure 1 / Paired, ATR- / 15	CCAACAAAACAAAACAAAAACACACAAAACCACAA
16	20201203-N-2	N	Figure 1 / Paired, ATR- / 16	AACAAAAACCAAACACAACACAAAAAAACCAAACAAAACCCAACAAAAAACAACAAACAACAACCCAAACAAAACAAAAAAACAAC

## Sheet: OK107 > Kir2.1
	Figure 1
	Male parent: OK107-Gal4; Female Parent: UAS-Kir2.1
	Training protocol: No Training
Number	Animal ID	Apparatus	File Path	Naive decision sequence
1	20210629-B-1	B	Figure 1 / OK107;Kir2.1 / 1	AAAAAACCCAAAAACCCCAAAAACAAACAACACCAAAAAACCCAAAAAAACAACA
2	20210629-B-2	B	Figure 1 / OK107;Kir2.1 / 2	ACACCCAAAAACACCCAAAA
3	20210629-B-3	B	Figure 1 / OK107;Kir2.1 / 3	AAACAAACCCAAAACAAAAA
4	20210629-C-1	C	Figure 1 / OK107;Kir2.1 / 4	AACAACCAAAACA
5	20210629-C-2	C	Figure 1 / OK107;Kir2.1 / 5	ACCCAAACAAAAACAAACAAACAAAACCCAAAAACCACAACCAAAACAAAAACCAAACAAACACACACACAAAAAAACACAAACCAAACAC
6	20210629-C-3	C	Figure 1 / OK107;Kir2.1 / 6	CCAAACAAAACAAAAAAACAACAAAACAAAACCCAACACAACCAAACCAACCAAACCAAAAAACACC
7	20210629-D-1	D	Figure 1 / OK107;Kir2.1 / 7	ACA
8	20210629-D-2	D	Figure 1 / OK107;Kir2.1 / 8	AAA
9	20210629-E-1	E	Figure 1 / OK107;Kir2.1 / 9	AACA
10	20210629-E-2	E	Figure 1 / OK107;Kir2.1 / 10	AAACA
11	20210629-E-3	E	Figure 1 / OK107;Kir2.1 / 11	AA
12	20210629-F-1	F	Figure 1 / OK107;Kir2.1 / 12	AAAA
13	20210629-F-2	F	Figure 1 / OK107;Kir2.1 / 13	AAAACCAAAACAA
14	20210629-F-3	F	Figure 1 / OK107;Kir2.1 / 14	AACAAAA
15	20210629-G-1	G	Figure 1 / OK107;Kir2.1 / 15	AACA
16	20210629-G-2	G	Figure 1 / OK107;Kir2.1 / 16	ACACCCAAACAAAAACAAAC
17	20210629-H-1	H	Figure 1 / OK107;Kir2.1 / 17	AACCA
18	20210629-H-2	H	Figure 1 / OK107;Kir2.1 / 18	AAAAAAAAAACACA
19	20210629-N-1	N	Figure 1 / OK107;Kir2.1 / 19	AAAACAAAAACAAAAC
20	20210629-N-2	N	Figure 1 / OK107;Kir2.1 / 20	AAAAACAACAAAAAACACAAACCA
21	20210629-N-3	N	Figure 1 / OK107;Kir2.1 / 21	CCAAACCAAACA

## Sheet: Gr21a > Kir2.1
	Figure 1
	Male parent: Gr21a-Gal4; Female Parent: UAS-Kir2.1
	Training protocol: No Training
Number	Animal ID	Apparatus	File Path	Naive decision sequence
1	20210702-B-1	B	Figure 1 / Gr21a;Kir2.1 / 1	AAACCACCAAAAACAAACCCACCACACCAA
2	20210702-B-2	B	Figure 1 / Gr21a;Kir2.1 / 2	CCCCACCACCCACCACCAACAAAA
3	20210702-B-3	B	Figure 1 / Gr21a;Kir2.1 / 3	CCCACAAAACACCCAACCAAAAACCACCAACCACACACCAA
4	20210702-C-1	C	Figure 1 / Gr21a;Kir2.1 / 4	AAACACCAACCAACACCCAAAACACACAAACCACACACAA
5	20210702-C-2	C	Figure 1 / Gr21a;Kir2.1 / 5	CACAAACAACCACAACACAACCCAAAAAAACCC
6	20210702-D-1	D	Figure 1 / Gr21a;Kir2.1 / 6	AAACCCACCCCAAAACACCAACACC
7	20210702-D-2	D	Figure 1 / Gr21a;Kir2.1 / 7	CCACCACACACACCACAACAAACACACCCCACACCAACACCCAAAAACACAACACAACCCCAACAAAACC
8	20210702-E-1	E	Figure 1 / Gr21a;Kir2.1 / 8	AAAC
9	20210702-E-2	E	Figure 1 / Gr21a;Kir2.1 / 9	ACAACCCCCACCACACCCCACAACACAACCCCCAAACCCACAACC
10	20210702-E-3	E	Figure 1 / Gr21a;Kir2.1 / 10	AACACACCCCCAAACCCCCAACA
11	20210702-F-1	F	Figure 1 / Gr21a;Kir2.1 / 11	AAAAAACCAACCCC
12	20210702-F-2	F	Figure 1 / Gr21a;Kir2.1 / 12	CACCCACAACCCACCC
13	20210702-G-1	G	Figure 1 / Gr21a;Kir2.1 / 13	ACACCCCCCCCAACCCACCAACACAAAAAAACCACAC
14	20210702-G-2	G	Figure 1 / Gr21a;Kir2.1 / 14	CACACACACACACAA
15	20210702-H-1	H	Figure 1 / Gr21a;Kir2.1 / 15	ACACACCAACAACACCCAAAAACAACAAACCCCCACACA
16	20210702-H-2	H	Figure 1 / Gr21a;Kir2.1 / 16	ACCAACACCCAAACC
17	20210702-H-3	H	Figure 1 / Gr21a;Kir2.1 / 17	ACCAACCCAACCAACCCAAACA
18	20210702-N-1	N	Figure 1 / Gr21a;Kir2.1 / 18	ACCAAACACCAACAAACCAACACCACCACCAAAAACCAC
19	20210702-N-2	N	Figure 1 / Gr21a;Kir2.1 / 19	AAACCCCCCAACCCAACACCACACACCCCACACAACCCAACAAAA
20	20210702-N-3	N	Figure 1 / Gr21a;Kir2.1 / 20	CCCCCAACAAAACA

## Sheet: Paired
	Figure 1
	Male parent: SS00864-Gal4; Female Parent: UAS-CsChrimson
	Training protocol: Paired training; repeated 20x
Number	Animal ID	Apparatus	File Path	Naive decision sequence	Post train decision sequence
1	20200618-B-1	B	Figure 1 / Paired / 1	AACAAACA	CAACCACAAC
2	20200618-C-1	C	Figure 1 / Paired / 2	AAAA	CACCACACCCCCCCACAAACCCACCACA
3	20200618-D-1	D	Figure 1 / Paired / 3	CACAA	CACAACACCCCA
4	20200618-E-1	E	Figure 1 / Paired / 4	AAACAACAAAAA	CCACCACAA
5	20200618-G-1	G	Figure 1 / Paired / 5	CAAACACAAAAACAAA	CACACAACAA
6	20200708-B-1	B	Figure 1 / Paired / 6	AAAAACCAAAAC	CAACCAACCCACCCACCAACACAACACCAAAAACCAAAAACCCACACAA
7	20200708-D-1	D	Figure 1 / Paired / 7	AAACAAAAAACA	ACAACCACCAACAC
8	20200708-E-1	E	Figure 1 / Paired / 8	AAAAAAACCCAAAACA	CCCACCAAC
9	20200708-E-2	E	Figure 1 / Paired / 9	AAAACACAACACAAA	CCCAACACACAAACC
10	20200708-F-1	F	Figure 1 / Paired / 10	AAAAAAA	CCCACCACCACACCAACAACACAACCCC
11	20200708-F-2	F	Figure 1 / Paired / 11	AAACACCAAAAACCCAAAAAA	AAACCACACACACCCCAA
12	20200708-G-1	G	Figure 1 / Paired / 12	AACAAAACA	AAACCACCCCCA
13	20200708-H-1	H	Figure 1 / Paired / 13	AAAAACCAAAA	CCACACAC
14	20200720-B-1	B	Figure 1 / Paired / 14	AAAAAAAACACCAACAAAAACAACACCAAAC	CACAACCCAACAAACAACAAAAAAAACCACCCCCCCACCCACAAACCCCAAAA
15	20200720-B-2	B	Figure 1 / Paired / 15	AAAAAAAAACAACAAC	ACCACC
16	20200720-C-1	C	Figure 1 / Paired / 16	AAAACACCAACAAAAACAACACCAAAAAACCCACACACAAAAAACAAAAAACCAACAA	CACACCCAC
17	20200720-C-2	C	Figure 1 / Paired / 17	AAAACCAA	AACCCACA
18	20200720-E-1	E	Figure 1 / Paired / 18	AAAAAAAAA	CAACAACACCCCCAACCACCAACACA
19	20200720-E-2	E	Figure 1 / Paired / 19	ACAAACACAACCACAAAAAAA	ACCACCA
20	20200720-G-1	G	Figure 1 / Paired / 20	CAAAA	CA
21	20200720-H-1	H	Figure 1 / Paired / 21	ACAAAAAAAAAACAACAA	CCCACACCACAAC
22	20200720-H-2	H	Figure 1 / Paired / 22	AACACAAACCAAAAAAAC	CAAC
23	20200811-B-1	B	Figure 1 / Paired / 23	AAAAAACAAACAAAACAAAAAAACAAACAACCAAAAAAAACAAACCACAAAAAA	ACCAAACCCCCAAAAACACCACCACCAAACCCCCAACC
24	20200811-C-1	C	Figure 1 / Paired / 24	AAAAAACCAAACAAAA	CAAACACCCACACAACAACCAACAACCAAACCACCACCCAAACCCACACAAAAACAACACACCAACAA
25	20200811-C-2	C	Figure 1 / Paired / 25	AAAAAAAAACACCAACA	CACAACCAC
26	20200811-D-1	D	Figure 1 / Paired / 26	AAACAAAAACAACAAAAAACCAAACCAACAAAACCAAAAAA	CACACACACAACCAAAACCAACCAACCACCCCACCCCACACCCACCCAAAAAAACACCAACA
27	20200811-D-2	D	Figure 1 / Paired / 27	AAAAACAAAACACAAA	CACCAACCCACAC
28	20200811-E-1	E	Figure 1 / Paired / 28	AAAACAAAACAAACAACAAACA	ACCACAACCA
29	20200812-B-1	B	Figure 1 / Paired / 29	AAAAAACCAAAAACCAAAAAA	CCAAACCCCACACCAAC
30	20200812-C-2	C	Figure 1 / Paired / 30	AAAAAACAAACAAACAACCACAAAAAAACCACACAAAACACAAAACAAAAAAA	AACAACACCCCACAACAACCCCCCCACAAACCACCAACCACCCCACA
31	20200812-D-2	D	Figure 1 / Paired / 31	AAACAAAAACACAACACCAAACACACACAAAAAACAAAAACAAAACAAAACCACAAACACCAAACAAAAAAAAA	ACCAACCCCCCCAAAAACCCAACAC
32	20200812-G-1	G	Figure 1 / Paired / 32	ACAACACAAAAACAACCACAAAACAACAAAAAAAACAAACAAACACAAAAAA	AAAACCCCAACACCCAACAACACCCACCCCCAACACAAAACCCAACCACCAAACCCACCCAACC
33	20200910-B-1	B	Figure 1 / Paired / 33	AAAAACAACAACAAACAAAAAC	CCCAAACCCCAAACACCCCACCAAACCACCACCAAAACAAACCACAACACAA
34	20200910-B-2	B	Figure 1 / Paired / 34	AAACAAAA	CCCAACACCAACACAACC
35	20200910-F-1	F	Figure 1 / Paired / 35	AAAAACACACCAAAAAAACAAAAACAA	ACCACCCCCAACCAAAAC
36	20200910-H-1	H	Figure 1 / Paired / 36	AAAAACAACAAAAC	CCCAC
37	20200929-B-1	B	Figure 1 / Paired / 37	AAAAAACAAAAAAACAACACACAAAAAAAACAAAAA	AACACACCACCAACAACCACCACACCCAACCACCAC
38	20200929-B-2	B	Figure 1 / Paired / 38	AACACAAAAAAACCCACACAAAAAAAACCAAAAAAAAACCCAACAACAAAA	CCCCAACCAACAACCCAAAAACAACACCCCACCCAACCAACACCACCAACAAAC
39	20200929-C-1	C	Figure 1 / Paired / 39	AAAAAACACAAACCAAAAAAAACAACAAACAAAAAAAAAACACAAACAA	AACACACAACACCCCAAACC
40	20200929-D-1	D	Figure 1 / Paired / 40	AACAAAACAACACACAACAAAAAAAAAACAAAAACACAAAAAACAACCAAAAAACCACAAAAAAAAAAAA	ACAACCACACCCCACACCCAACCACACCAACCACCAACCCAACCCACACCCCCCCAAAAAAAACAACCACCCCCCCACC
41	20200929-D-2	D	Figure 1 / Paired / 41	CAAAAAAAACAACCAAAA	CCCCCA
42	20200929-E-1	E	Figure 1 / Paired / 42	AAAACAAAACAACAAACAAACAAACACAAACACCAAAACAAAAACCACAAAAACCCAA	ACACCCACCACCAACCACACCA
43	20200929-F-1	F	Figure 1 / Paired / 43	AAAAACCAAAAAACCAAAACACAAACA	AACCACACCCACAAAAACCACACC
44	20200929-G-1	G	Figure 1 / Paired / 44	AAAACCAACAAAAAAACACAAAAACACCAAAACAACAAAAAACAA	CACCCAACCACCCCCACAC
45	20200929-H-1	H	Figure 1 / Paired / 45	AAAACACACACCCAAAAACAACAAAAAAACAACAAAACAAAAAACACCAAAAAAAAACAAAAACCAAACAAAAA	AAACCAAAAACAAAAAAAACCCCACCACCACACCAAACACAACAAACCCACCAAAACCAAAAAACACACCCAACC
46	20200930-B-1	B	Figure 1 / Paired / 46	AACACAAAAAACAAAACACCCACAAACAAACAAAAACAAACAACAAAAACCACCACAAAAAACAAAAA	CAACAAAAACAACACCCAAACAAAAACCAA
47	20200930-C-1	C	Figure 1 / Paired / 47	AAAACAACAAAAAAACACAAAACACAAAACCAAACCAAAACAAAAAACAAAACAAAACACAAAAAACAAAAAACACAACAA	ACACCC
48	20200930-D-1	D	Figure 1 / Paired / 48	ACAAACAAAAAAAAAAAAACCAAACCAAAAACCAAAAACAAACACCAAAAACAACCAACACCACAAAC	CACCAACCAACACAAACACCCCCCCAACCACAAAACCAAAACCCACCACAAAACCCCACACAAACACCACCACAC
49	20200930-E-1	E	Figure 1 / Paired / 49	AAAACAACAAAAAACAAAAAACAAAAACAACAAAAAAACAAAAAACAAAACAAAACAACAACAACCAACAAAAACACAA	AACAACCACACCACCCAACCC
50	20200930-F-1	F	Figure 1 / Paired / 50	ACCAAAAAAAACCAAACAAAAAAACA	ACACAACACCAACACCACCACACAA
51	20200930-G-1	G	Figure 1 / Paired / 51	AAAAAAACACACCAAAAAAACAAACACCCCAACAAAAAACAAAACAAAACACAAAACCAAAAAAAAACAACCAAACACAA	ACACCACACAACCCCCAACCCAACCCCACAACAACCCACAAACACAAACCCAACCAA
52	20200930-H-1	H	Figure 1 / Paired / 52	ACAAACAAAAAAAACCAAAAAAAAAAACACCAAAAAAAACAAACCAACAAAACAAAAAACAAAACACCACAAAACCACAAAAAA	AACACACCCCCCAACCAACCACAAACAACAAAA
53	20200930-H-2	H	Figure 1 / Paired / 53	CAAACAAAAAAAAACAAACAAACCACAAAACAAAACCACACAAAAAACAAACAAAACCACAAAAAACACACAACAACAACAAAAAACCAAAAAAA	CACCCAACACCAACCACACACCAACCAACCAACAACACAAAACACAACACACACCACCCACACAAAC
54	20201001-B-1	B	Figure 1 / Paired / 54	AAAAAAAACCAAAAAAAAACACCAACCAAAACAAAAAACACAAAAACAAACACAAAACCAAAAACAAAAAAACAAAACACCAAAAAACACACCAAAAA	AACAACCCACCAACACAAACCACCCACCAACAACCCCCCAACACCCCACCACACACCACCCAAACACA
55	20201001-C-1	C	Figure 1 / Paired / 55	AAAAACACAAAAACAAAAAAAAAACCAA	CCCAAACA
56	20201001-C-2	C	Figure 1 / Paired / 56	CAAAAACAAAAACCAAACACACAAA	CACCACAAACCAA
57	20201001-D-1	D	Figure 1 / Paired / 57	AAAAACAACAAAAAAACCAAACAAAAACAACAAAACACAAAAAACACACAACCAAAAAAAACAAAA	CCCCAACACACCCCAACAACCAACACAAACACCAACAACACC
58	20201001-D-2	D	Figure 1 / Paired / 58	AAACACAAAAACAAA	CCCAAACAACCCCAAA
59	20201001-E-1	E	Figure 1 / Paired / 59	CAAAAAAACCAACAAAACAAAA	AAACCCCACC
60	20201001-F-1	F	Figure 1 / Paired / 60	AAAACACAAAAAAACAAACAAAAACACCAA	ACACCAAAACCCAACAAAACCAAACCAACCCCCACCAAAA
61	20201001-G-1	G	Figure 1 / Paired / 61	AACAAAACACAACAACCAAACAAAAAAA	ACACCACCAA
62	20201001-G-2	G	Figure 1 / Paired / 62	AAAAACAAAACAACAAAAAACACAAAACAAAAACAAAAACACCAAAAACCCAAAAACCAAAAAACCAAAACAAAACAAAAC	AAAACCCAACCCCAAACCAAC
63	20201001-H-1	H	Figure 1 / Paired / 63	ACAACACACAAAAAAAAACAAAAAAACCAAAAACACCAAAAAACCAAAAACCAAACAAAACAAAAAA	ACAACAACCACCCACCCACCCAAACCACCAACAAACACACACACAAAAAACAAACAAAACAAACAAACAACACCCACACAA
64	20201001-H-2	H	Figure 1 / Paired / 64	CAAAAAAAAAACAAAAAAAACCACACACAAAAAACAAAAAAAAAAACAAACACAACAAAAAAACACCAACAAACCAACCACAA	CAAAACCCCCACAACAACCCCAACAAACCACACAACCACACAACCAAACA

## Sheet: Offset After
	Figure 1
	Male parent: SS00864-Gal4; Female Parent: UAS-CsChrimson
	Training protocol: Reward offset after CO2 presentation; repeated 20x
Number	Animal ID	Apparatus	File Path	Naive decision sequence	Post train decision sequence
1	20201202-B-1	B	Figure 1 / Offset After / 1	ACACAAAAAAAAACCAAAAACAAAAAACACCAAAACCAAAAAAAACCACACAAAAAAAACCAACAAACCAAACAAAAAACCCAAAAAAACAACCACAAAAACC	AACAAACCCCCCACAAAAAACCAAAACCACACAAACAAACAA
2	20201202-B-2	B	Figure 1 / Offset After / 2	ACAAAAAAAAAACACCAAAAAAAAACACACAAAAACCAACAACAAACAAAACCAAACCACAAAAAAAACACACACAAAAAAACCAACAAAAAACCAC	AAACCACCCACACACAACACCCACCCACCCCAA
3	20201202-C-1	C	Figure 1 / Offset After / 3	AAAACCAAAACAACAAAACAAAAAACAACACCAACACAAACAAAC	CAACCCCACAACACAACCCACCC
4	20201202-C-2	C	Figure 1 / Offset After / 4	AAAAAAC	CCCCACAAAAACCCACCAACCCAAACAAACCAACCCCCCCCA
5	20201202-D-1	D	Figure 1 / Offset After / 5	CAAAACCAAACAAACCAAAAACCACCACAACAAAAAAAAACAAAAACACAAAAACCCCAAAAAAAACCCAAAAAAAACAAAAAAC	ACCCAACACA
6	20201202-D-2	D	Figure 1 / Offset After / 6	CAAAACAAAACACAAAACCACAAAAAAAAAACAACACACAACCAAAAAAC	ACAAACCCCAAACAA
7	20201202-E-1	E	Figure 1 / Offset After / 7	AACAAAAACAC	AAACA
8	20201202-E-2	E	Figure 1 / Offset After / 8	AAAACCAAAAACAAAAAAC	CCACCACCAAACCCACACCCACCACAACAACCCACAAAAAC
9	20201202-F-1	F	Figure 1 / Offset After / 9	AAAAACCAAACAAAAACCAAAAACCAAAAACACACAACAACACCCAAAACCAAAAACACACCAA	ACACAAACACCACACCAAAACACCCCAAAAAACCACAAC
10	20201202-F-2	F	Figure 1 / Offset After / 10	AACAAACACACAAAAAAAAAACAAACAAAAACCA	CCCCACCCC
11	20201202-G-1	G	Figure 1 / Offset After / 11	AA	ACCAAACAAAACAACACCACCCAACCAACACACCCCCCCAACCACCACC
12	20201202-G-2	G	Figure 1 / Offset After / 12	CAAAACAAACACCAAAACAAAAAAAACAAAAACACAACAAAACAAACCACAAAAAACAAAAACAAAACAACCAACAACAAA	ACACCAACACACCCCCAAAAACACCAACACCCACAA
13	20201202-H-1	H	Figure 1 / Offset After / 13	CAAAAACCACAAAAACACACAAAAAACAAAAAACAAAAACCCAAAAACAACAAAAAA	AAACAAAAC
14	20201202-H-2	H	Figure 1 / Offset After / 14	AAACCAAAAAACCCAACAAAAAACCAAAAAACAACCAAACAAAAC	CCAAACCAACCCCACACAACAA
15	20201202-N-1	N	Figure 1 / Offset After / 15	CCAAAAAAAAACAAAACAAAAAACACACACACAAAAAAAAACAACAACAAACACAAAAAACAAAACCACCAAAAACCAAAAACAAACAAACAAA	CCAAAAAACAAAACCAAAACCACCAAAACAAACCACACCACAACCAACCCACACCACCCCCCCCACACAACCCAAACCCAACAAACCCCCCACCCAACACAC
16	20201202-N-2	N	Figure 1 / Offset After / 16	CAAAAACCACAAAAAAAAACAAAAACCACCAAAAAACACACACAACAAAACAAAAA	AAACCCCAAACCCAAAACAACACCCCAAACCACACACACAACAA
17	20201208-C-1	C	Figure 1 / Offset After / 17	ACAACAAAAACCACAAAAAAAAAACAAACAAAAACCAAAA	ACAA
18	20201208-D-1	D	Figure 1 / Offset After / 18	CAACAACCAAAACAAAAAACAAACAACCACAAAACAACAAAAACCCAAACACCAAACACAAAACAAAC	CCAAAC
19	20201208-G-1	G	Figure 1 / Offset After / 19	AAACCACAAAACCAAAACACAACAAACAAAACAACAACCAACAAAC	CACCACACCCCAAACACAAAACCCACACCCACCACAACACCCAACACCAC
20	20201208-N-1	N	Figure 1 / Offset After / 20	ACACAAACAACCAAAACAAAAACAAAAAACACAAAAACCAA	CAACCACCCCCACACAACAACCCCAACACCAACAAACACA

## Sheet: Reverse Paired
	Figure 1
	Male parent: SS00864-Gal4; Female Parent: UAS-CsChrimson
	Training protocol: Reverse paired training; repeated 20x
Number	Animal ID	Apparatus	File Path	Naive decision sequence	Post train decision sequence
1	20200805-B-1	B	Figure 1 / Reverse Paired / 1	AAAAAAAAAAAACCACAAAAACA	AACAAAAACCAACCACAAAA
2	20200805-C-1	C	Figure 1 / Reverse Paired / 2	AACAACAAAAAACCAAAAAAA	AAAA
3	20200805-C-2	C	Figure 1 / Reverse Paired / 3	ACAAACAAA	AAAACACACCAAACAACAAACAAAACAAAACCAACAAACAACAAAACACACAAAAAAAAACAAA
4	20200805-D-1	D	Figure 1 / Reverse Paired / 4	AAAAAACCACAACAAAACAACCAACAAAAACAAACAAAACAA	AAAACACAAACA
5	20200805-E-1	E	Figure 1 / Reverse Paired / 5	AAAAAACACAAAA	AACA
6	20200805-F-1	F	Figure 1 / Reverse Paired / 6	CAAAAAAACAA	AAAAA
7	20200805-H-1	H	Figure 1 / Reverse Paired / 7	AAAAACA	AAACAA
8	20200805-H-2	H	Figure 1 / Reverse Paired / 8	AAAAACCAACAAACCAAACCAAAA	ACCAACACAAAAACAAAA
9	20201014-B-2	B	Figure 1 / Reverse Paired / 9	CAAAAAAACAAAACAAACAACCACAAAAAAAAACAAAACCACCAAAACACAAACACAAAACACCAAC	AACAAAAAACAAAAAACCAAA
10	20201014-D-2	D	Figure 1 / Reverse Paired / 10	CAAAAAAACAACCACAAAACAAAAAAAACCA	AACAACAAAAAAAACCCAAACAAAAAAAACAACAAAAAACAAAACCAAAAACAC
11	20201014-F-2	F	Figure 1 / Reverse Paired / 11	CAAAACAAACAAAAACAAACAAA	AAACAAACA
12	20201014-G-2	G	Figure 1 / Reverse Paired / 12	AAAAAACAACAACAACACAACAACAAAAACAA	AAAAC
13	20201015-B-1	B	Figure 1 / Reverse Paired / 13	AAAAACAAAAACAAAAAAACAAAAAAAAACAACACCAAAAACCAAAAAAAAAACCAAAAACAACCAACCACCCCCAAACCAACCCACAAACCAACACAACCAACAACAACAAAAAAAACAACACAAACAAAA	AACAACAAAAACAAA
14	20201015-B-2	B	Figure 1 / Reverse Paired / 14	AAAAAAACCAAAACAAAAACACAAAAACCAACAAACAAACACACAAAAA	AAACAAAAAAAAAAACCACAAAAAACACAA
15	20201015-C-1	C	Figure 1 / Reverse Paired / 15	AAAAAAACCAACAAAACACCAAAAAACAACAAAACAAAAAAAACACAAACAAA	CAAACAAAAAACACAACAACAAAA
16	20201015-C-2	C	Figure 1 / Reverse Paired / 16	AAACAAAAAACAAACAAAACACAAAAAAAA	AAAC
17	20201015-C-3	C	Figure 1 / Reverse Paired / 17	CAAACAAAAAACAACAAAAAACAAAAAACAACAAAAAAACAAACACAAA	AAAAACAAAAACCAACAAAACCAAAAAAAAA
18	20201015-D-1	D	Figure 1 / Reverse Paired / 18	CAAAAAAAACAACAACACAAAAAAAAAACAAAAA	CAAAAAACAAAA
19	20201015-D-2	D	Figure 1 / Reverse Paired / 19	AAAAACACAAACACAAAACACAAAAAAAACAAAAAAACCCCCAAAACAACAAAAAACAAACACA	AAAAAAAACAAACACAAAAACACCAAAAACAAAAAAAACAAAAAACAAAACACAAAAAAAA
20	20201015-E-1	E	Figure 1 / Reverse Paired / 20	ACAAAAAACAACAAAACAAAAACCACACAA	CAACAAACAACAAAAAAAAAAACCAAAAACAAAAAAAACCAAACCAACAAAC
21	20201015-E-2	E	Figure 1 / Reverse Paired / 21	AAAAACAAAACAACAAACAAAAAACAAAAAAACAAAAAACACAACAAAAAACAACACCAACAAAAAAAA	AAAAACAAACAAACACCAAAACCAACAAAAACACAAAAAAAAAAA
22	20201015-E-3	E	Figure 1 / Reverse Paired / 22	AAAAAACCAAAAAAAAACACAAAAACAAAACAACACAAAAAAAAACAAAAAACACAAAAAAACAAAAACACCAAAAAAAAAAAAACAAAAAAACC	AAAAACAAACAAAAAAACAAAAAAACCAAAAAACACCCACAAACCAAACCCAAAAAACAACAACC
23	20201015-F-1	F	Figure 1 / Reverse Paired / 23	AAAAAAACAAAAAAACACACAACAAAAAAAAAAACAAAAACAAAACC	AA
24	20201015-F-2	F	Figure 1 / Reverse Paired / 24	CAAAAAACAAAAAAACAAAAAAACACAACAAAAACAA	AAC
25	20201015-G-1	G	Figure 1 / Reverse Paired / 25	CAAAACAAAAAAAACAAAACAAAAACACAAACAACAAAAAAAACAAAAAAACACCACAAACAAAAAAAACACACCAAAAAACCAAAAAACAAAAAACAAAAAAACCACCAA	AACCAAAACCAAAAACAACAAAAACAA
26	20201015-G-2	G	Figure 1 / Reverse Paired / 26	AAAACAAAACCAAAAAACAACAAAAACAAAAAAAACAAACAAAAAAAACCACC	CAAAAACACAAAA
27	20201015-H-1	H	Figure 1 / Reverse Paired / 27	AAAACCAAAAAAAAACAACAACAAACAAAAAA	AA
28	20201015-H-2	H	Figure 1 / Reverse Paired / 28	AAAAAAAACAAACACAAAAAAAACACAAACAAA	AAAAAAACCAAAACCA
29	20201015-H-3	H	Figure 1 / Reverse Paired / 29	AAAACACAAAACCACACAAAAAAACAAAACAACAAAAAACAAAAAACACAAAACCACACCACAAAAAAAAACAACCCCAACAAAAAAACAACAACACACAACAAAAACCAAAACAA	AAAAACAAAAAAAAACAAAAAAACAAAAAAACAACACAAAAAAAAACAAAACACAAAAAA

## Sheet: Offset Before
	Figure 1
	Male parent: SS00864-Gal4; Female Parent: UAS-CsChrimson
	Training protocol: Reward offset before CO2 presentation; repeated 20x
Number	Animal ID	Apparatus	File Path	Naive decision sequence	Post train decision sequence
1	20201204-B-1	B	Figure 1 / Offset Before / 1	CAACAACAAAAAAACCAACA	AAACACCAAAACACCAACCACAAC
2	20201204-B-2	B	Figure 1 / Offset Before / 2	CACCACACAAAAAAAACAAA	AAACAAAAACAAAACAACACAAAAAAAAACAAAACACAAAAAACCAACACACACCCAAAACCACACACAAACAAAACCAAAAAAAAAACACAAAAAAC
3	20201204-C-1	C	Figure 1 / Offset Before / 3	CCAAAACACAAAAACACAACACAAAAAAACCAAACAAACAAAACACA	AAAACAAAC
4	20201204-C-2	C	Figure 1 / Offset Before / 4	AAAAAAAAAACAACACACAA	AA
5	20201204-D-1	D	Figure 1 / Offset Before / 5	ACAAACAAACCAAAAAACC	AACAAA
6	20201204-D-2	D	Figure 1 / Offset Before / 6	ACAACAAAAAAAAA	ACAACACCAA
7	20201204-E-1	E	Figure 1 / Offset Before / 7	ACAAACCAAACAACACCAACAACAAAAAAACAAAAACACAAAACCCA	AACACAAAAAAACACAAAACCA
8	20201204-E-2	E	Figure 1 / Offset Before / 8	AAACCAAAC	AAAAACAC
9	20201204-F-1	F	Figure 1 / Offset Before / 9	ACCAAAAAAAAAAACCCACACAAACAAAAACACCACAAACACACAA	CAAAAAACAAACAAACC
10	20201204-G-1	G	Figure 1 / Offset Before / 10	AAAAACAAAC	AACAAC
11	20201204-G-2	G	Figure 1 / Offset Before / 11	AAAAAAACAACACAACCAAAAAAAAACCAAACCAACACAAAACAAACAAACAAACACACAACCAAACCACAACAACCAAACACCACAAAAAAAC	ACAAAACAAACC
12	20201204-H-1	H	Figure 1 / Offset Before / 12	AACAAAAACAACAAAACACACAAAAACACA	CAA
13	20201204-H-2	H	Figure 1 / Offset Before / 13	AACCAAACACAAAACAACCAAAACAAAAAACCCAAAAAAAAACAAACCAACCAA	AAAACAACACAAACAACAAAA
14	20201204-N-1	N	Figure 1 / Offset Before / 14	CAAAAACACCAAAAAACCACAAACAAACAAAAACACCAAAAAAAACCCAACCAAAACACACCACAAAAACACCAAAAACAACACAA	ACACAAACAAAACCACAAAACAACACAACAAACCACCC
15	20201204-N-2	N	Figure 1 / Offset Before / 15	AAAAAAACACCCAAACCCAAACACAAAAAAAAAAACACACAAAAAACCCCAAACCAAC	CCAACCCAACACCAACCAC
16	20201208-B-1	B	Figure 1 / Offset Before / 16	CCAAAACAAAACCAAAAACCAAACCCAACAAAAAACACAAAAACCCAAACAACAAC	AACAACACCAAACAAAACCCAAACAAAAACAACCAAAAAAAAAAACAAAAA
17	20201208-E-1	E	Figure 1 / Offset Before / 17	AAAAACAAACAA	AAA
18	20201208-F-1	F	Figure 1 / Offset Before / 18	ACAAAAAAAAAACACACCAAAACAACAAACACCAAACAAAACAAAAAAAA	CAACAAA
19	20201208-H-1	H	Figure 1 / Offset Before / 19	AAAAACCAAAACAACACAAAACCCAAACAAAACAAAAC	CACAAACAAAAAAAACCAAACAAACAAACAACCAACAAAAACAAACAACACACAAAAACAACACAAAAAAACCACAAAAACACAAAACAAAAAAC

## Sheet: Paired, ATR-
	Figure 1
	Male parent: SS00864-Gal4; Female Parent: UAS-CsChrimson
	Training protocol: Paired training; repeated 20x
Number	Animal ID	Apparatus	File Path	Naive decision sequence	Post train decision sequence
1	20201203-B-1	B	Figure 1 / Paired, ATR- / 1	CCCAACCAAAAAACAACAAAAAACAACCACACAACAAAAAAACAAAACCAAAACCAAACAACAAACAACAACAACCCAAACACACAAAAAAAACACAAAAAAA	AAAAAC
2	20201203-B-2	B	Figure 1 / Paired, ATR- / 2	AACCACAAAAAAAACCAAAACACACAACAAAACCAAAACAAAAACACCAAAAAAACACAAACCCAACAAAAACACAAAACA	CCCAACACAAAAAACCAAAAAACAACAAACAACAAAAC
3	20201203-C-1	C	Figure 1 / Paired, ATR- / 3	CACAAACCAACAAAAAAAAACCACCACAAAAAAAAAACAACACCACAACAACCAACAAAAAAAACCAAAACACACAAAAACACCAAAAACCAAAAACCAAACCAAAAAAAACCACACACAAAAAAAAACC	ACCAAAAACAAAAACACACAAACCAACAA
4	20201203-C-2	C	Figure 1 / Paired, ATR- / 4	ACCAAAAAAAACAAACAAAAAACCAACCCCAAAAAAACCAACAACCAAAAAACACCAAAAAAACCAACAAAACACAAACAACAAACCCAACCAAAAAAAACCACAACACAAAAAAACAA	AAAACCCAAACCACAAACAAAAAACACAAACCAACAAAACAAACAAAAAAACCA
5	20201203-D-1	D	Figure 1 / Paired, ATR- / 5	ACCAAACAAAAAAACAAAAAACACA	CAAACAACCAAACCCAAACAACACCAAACCAAAAAACCACAACCAACAAACCAAACAAAACCAAACAAAACA
6	20201203-D-2	D	Figure 1 / Paired, ATR- / 6	ACCAAAAACAAAAAACCAAAAAC	CAACAAAAACA
7	20201203-E-1	E	Figure 1 / Paired, ATR- / 7	AAAAACAAAACAACACCCAACCAAAAAACACAAAACCAACAAAACCAAAACAAAACAACCACACAAAAA	AAAACCAAACAAAAC
8	20201203-E-2	E	Figure 1 / Paired, ATR- / 8	AAAACCAAAAACCAAAAAACAAACC	ACAAACACAAAACACCAACAAACAACAAAAAACAAAAAAACAAAAC
9	20201203-F-1	F	Figure 1 / Paired, ATR- / 9	ACAAAACA	AAAAAACAAAACACACAAACA
10	20201203-F-2	F	Figure 1 / Paired, ATR- / 10	AAAAACAAAAAAAAAACACACACCCAACAAAAAAAACACACAAAAC	CACACAACCAAAAAAAAACCAACAAACAAAACACAA
11	20201203-G-1	G	Figure 1 / Paired, ATR- / 11	AACCACAAAAACAAAACAAAAAAACCCAAAAACCA	AAAAACAAACAACACAAACCA
12	20201203-G-2	G	Figure 1 / Paired, ATR- / 12	ACAAACAAACAAAACAAAACAAA	AA
13	20201203-H-1	H	Figure 1 / Paired, ATR- / 13	ACA	AAAA
14	20201203-H-2	H	Figure 1 / Paired, ATR- / 14	CAAACCAAACAAAAAACCCAAAAAAAACACAACCAACAACCACAAAACAAAACCAAAAC	CAAAAACACAAAAACAAAACACAAA
15	20201203-N-1	N	Figure 1 / Paired, ATR- / 15	CCAACAAAACAAAACAAAAACACACAAAACCACAA	AAAC
16	20201203-N-2	N	Figure 1 / Paired, ATR- / 16	AACAAAAACCAAACACAACACAAAAAAACCAAACAAAACCCAACAAAAAACAACAAACAACAACCCAAACAAAACAAAAAAACAAC	AAACAAAAACCACCAACAAAAACACAAAACACAAAAACCAAAAACCAAAC

[truncated: 13 more sheets: No Training, DAN without CO2, Driver control, Effector control, 58E02>CsChrimson, LexA-58E02, Extended air spacing, forward p, Extended air spacing, backwards, Extended air spacing, reward bt, CO2 6.5%, CO2 8%, CO2 15%, CO2 18%]
