# Supplementary material for: Switch-like and persistent memory formation in individual Drosophila larvae
Source: eLife. 2021 Oct 12;10:e70317. doi: 10.7554/eLife.70317 (PMC8510578; doi:10.7554/eLife.70317)
Supplement: Figure 2—source data 1. [file elife-70317-fig2-data1.xlsx]

## Sheet: 0 cycles
	Figure 2
	Male parent: SS00864-Gal4; Female Parent: UAS-CsChrimson
	Training protocol: No training
Number	Animal ID	Apparatus	File Path	Naive decision sequence	Post train decision sequence
1	20200727-B-1	B	Figure 1 / No Training / 1	AAAAACAAACAAAACAA	AACAAAACACAAAACACA
2	20200727-B-2	B	Figure 1 / No Training / 2	AACCACAAAAAAAACAAACCAACACCAAACACAAACAACCCAAAACCCAAACACCCACAACCAAA	CCAAACACAACAAAAAAACACACAAACAAACACCAACACACAAAAAACCCAAAAACAAACCAACAACACA
3	20200727-C-2	C	Figure 1 / No Training / 3	AAAAAAAACCCACAAACCAAACCAACCAAA	CAAAAAAAAACCCACCAAAAAACCCCAAAAAACAAACCACCAAAAACCAACCAAAAACAACCAAACCACAAAAAAACAAACCAACAAACAAAAAAA
4	20200727-D-1	D	Figure 1 / No Training / 4	AAAAAAACCAAACAAAAAACAAACCAACAAACACAACCCAAAA	AACAACAAAACAA
5	20200727-D-2	D	Figure 1 / No Training / 5	AAAAAAACAAACAAACACAACCCACAAAAACAACAAAACAAAACCAACACAAAAAAAAAAACAACACCCAAAAACAAA	AAAACCAACAACCAAACAAAAAAACACCCACAAACAAAACACAACAAAACCAAACACACAACCAAAAAACAAACAAAACACAAAACCAAACCAAACAACCACAACCACCCAACCAAAAAACAAA
6	20200727-E-1	E	Figure 1 / No Training / 6	AAAAACAACA	AAAAA
7	20200727-G-1	G	Figure 1 / No Training / 7	AACAAAACAAC	AAAAAC
8	20200727-H-1	H	Figure 1 / No Training / 8	AAAACACACACAAAAACAC	ACCCAAAAAAACAAACA
9	20200728-B-1	B	Figure 1 / No Training / 9	AAAAAACCAACACAAAACAA	CAAACAA
10	20200728-B-2	B	Figure 1 / No Training / 10	ACACAAAACACCAAAACAAACAAAAAACCCAAAAAACCAA	AACCAACAAAACCAAAACAAAAACCCAACCAAAAACAAACACAACAACAAAAACA
11	20200728-C-1	C	Figure 1 / No Training / 11	AAAAAAAAACAACAAAACAAAACAAAAACCACCAACAACACAACAAA	AACAAAACACACAAAAACCAAAAACAACACAAAACAAAAAACAACCACAACCAAAAAA
12	20200728-C-2	C	Figure 1 / No Training / 12	AAAAAAAACCAACACCACCAAAAAACAACAAACACACACACACCAAACCCAAACAAAAAAACACAACCAACCAACCAAAACAAAA	AAAAAAACACAAAACCCAAAAAACACAACACAACACACAAACAAAAAAAACCAAAACCCAAAACACCAAACCACCAACCCAACAAACCAACACCCAAACCAAACAAAAAAACCAAA
13	20200728-D-1	D	Figure 1 / No Training / 13	AAAAAAACACA	AAA
14	20200728-D-2	D	Figure 1 / No Training / 14	ACAAAAACAAACAAACAACAACACACAAAACAAAACCAACACAAAAA	AACAAACAAACACAAACAAAAAAACACACAAACACA
15	20200728-E-1	E	Figure 1 / No Training / 15	AAAACAA	AA
16	20200728-F-1	F	Figure 1 / No Training / 16	AAAAA	ACACAAAAAAAAA
17	20200728-F-2	F	Figure 1 / No Training / 17	AAAACAACACCACACAAACCAAAAAACACAAAACCACCAAAAAACAAAAAAACC	AAAAACCAACACAAAAAACCCAAAAAAACACACAAAACACCCAAACAACAAAAACCCACAAAACCCAAACAACCAA
18	20200728-H-1	H	Figure 1 / No Training / 18	AAAACAACAAAAACAAAACCAAAAAAAA	AAA
19	20200811-B-1-0	B	Figure 1 / No Training / 19	AAAAAACAAAACCAACACAAAAA	AAAAAAAAACCACAAAAAACAAAAAAACAAAAACAAAAACAAACAAAACAAACAAAAA
20	20200811-E-1-0	E	Figure 1 / No Training / 20	AAAACAACAACCAAAACAAA	AAAACAA
21	20200811-F-1	F	Figure 1 / No Training / 21	AAAAAAAAACACCAAACCAAAA	AAAAAAAACAACAACAAACAAAAAAACACCAACA
22	20200811-G-1	G	Figure 1 / No Training / 22	CAAAAAAAAACACCAACACAAAAAAAC	AAAAAAACAACAAACA
23	20200811-G-2	G	Figure 1 / No Training / 23	AAAAACAAAAC	CAAAAAAAAAAACCAACAAAAAAACAAAACAAACCAAAAACAAAAA
24	20200811-H-1	H	Figure 1 / No Training / 24	AAAAAAAAA	ACAAAAA
25	20200812-E-2	E	Figure 1 / No Training / 25	AACACAAAAAACAACACAAAAACCAACCAAAAA	AAAAAAACCAACCAACCAAAACAAACCAAAAAAAAAAACAAACCAAAAACAAAAAAAACCAAAAAACACCAAACAACCAAAACCAAAAA
26	20200812-F-2	F	Figure 1 / No Training / 26	AAAAAACAACAA	AA
27	20200812-H-1	H	Figure 1 / No Training / 27	AAAAACAACAAAAAC	AAAAAAACA
28	20200813-G-1	G	Figure 1 / No Training / 28	ACCAAAAAAACACAAAAAAAAAAACAAACCACAACCAAAAAAACAACAAACAAACCAAAACCAACAAAAAAAAACAAAAAAAAACCACAAAAAAACAACAACCCAAAAAAAAACACA	AAAACACCACCAAAAAAAAA
29	20200813-G-2	G	Figure 1 / No Training / 29	AAAACCAAAACAAACAAAAAACA	AACAAAAAAACACACAAAAAAAACAAAA
30	20200911-H-1	H	Figure 1 / No Training / 30	AAAACAAAAAACCACCAACACAACAAAACAACAACAAAACAAA	ACCACAAAA
31	20201008-B-2	B	Figure 1 / No Training / 31	AAACAAAACAAAAAAAACAACAAAAACAAAAAAACAAAACAAAAAACAAAACACAAAACAAAAACCACAACCCAAAACAAAAAACACAAAACAAACAAACACCAAACACAACCAACACACACCCAAACAACACAACCACACAACCAA	AACCAAAAACAAAACAAAAAACAAAAAAAACAAAACACCAAAAAACCACAAAAACAACAACCAAAACACAAAAACAAACAAACAAACAAAAA
32	20201008-D-2	D	Figure 1 / No Training / 32	AACACAAAAACAAAACCAACAAAAAACCAAAAAACCAAAAAAACCAAAAAAACACACAAAAACCCAACAAACAAAAAACAACCAAAAAA	CAAACAAAAAACCAC
33	20201008-E-2	E	Figure 1 / No Training / 33	AACAAACAAAACAACAAAAAAAACACAAACAAAACAAAAAA	AAAAAACAAAAACCA
34	20201008-F-2	F	Figure 1 / No Training / 34	AAAACAAAAACAAAAAACAAAAACCAAAAAACACAAAAACACCAAAACAAACAACAAAAAACAACCACAAAAAAACCAAAAACAACACAAAA	CAAACAAA
35	20201008-G-2	G	Figure 1 / No Training / 35	CAACCCAACAAACAAAAAAAAAAAACCAAAACAAAACACAAAAAAACACAAAACAAAA	AAAACAAACAAAAAACACACAAAAACAAACAAAAACCAAAACAAACAAAAAAAACACAAAACAAAAAAACAAAACAAAACAAAAACAACAAAAACAACAAAA
36	20201008-H-2	H	Figure 1 / No Training / 36	AACAAAACAAACAAAAAAAACCAAAAACAAAAAACAAACAACAAACACAAAAAAACAAACAAAAAAACACAAA	AACAAACAAAAAAACA
37	20201009-B-1	B	Figure 1 / No Training / 37	AAAAAAAACAACAAAAACCAAAAACAAAACCAACCCACAAAAACAACAAACACAAAACCACAAAAAACAAAACACAAACCCAAAAACACACACAAAAA	AAAAACCAAAAACAAACAAACAACAAAACAAAAACCAAAACAAAAACAACCAAAACACACAC
38	20201009-C-1	C	Figure 1 / No Training / 38	CAAAAAACAACAAAAACAACAAACAAAAAACACAAAACAAAAC	ACAA
39	20201009-D-1	D	Figure 1 / No Training / 39	AAACAAAACAAACCAAAACAAACAACAAAACAAAACCAAAACAAAACACACACAAAAAAAACAAACAACA	ACAACAA
40	20201009-E-1	E	Figure 1 / No Training / 40	CAAAAAAAACCAACACAAACCACACAAAAAAAACACAAAAAAACAACACCAAAAAAACACCAAAAAAAACCACACAAAAACCAAAAACCA	ACAAAAACAACACACACAAACAAAACAAACAAAAAAAACACA
41	20201009-F-1	F	Figure 1 / No Training / 41	AAAAAACAACAAAAACCAACCAAA	AAACAAAAAACACAAC
42	20201009-G-1	G	Figure 1 / No Training / 42	ACAAAA	CAAAACAAAACAACAC
43	20201009-H-1	H	Figure 1 / No Training / 43	AACAAAAAACAAACACAAAAAACCAAAACAAAAACAA	AAAC
44	20201010-B-1	B	Figure 1 / No Training / 44	AACAAAACCAAAAACACAACAAAAAAAAAACCAACCAAACAAACAACAAAAACACCACAAAAAAAAACAAAAAAACCCACCACA	CAACACAACCAAAAACAAACAAAACAAACAAACAACAAACACAAAAACAAACCAAACAACAACAACAACAACAAACAAAAAAAA
45	20201010-C-1	C	Figure 1 / No Training / 45	AACAAAACAAAAACAAAAACCACCACCAAAAAAA	AACAAACA
46	20201010-D-1	D	Figure 1 / No Training / 46	AACAACCAAAAAAACAAAACACAAAACAACACAAAAAAACCACACCAAAACAAACCCACAAAC	AACAAAAAAACAAACCACAAAACCAACACAAAAAA
47	20201010-E-1	E	Figure 1 / No Training / 47	AAACAAACCAAACAAAACAAAAACACCAAACAAACCACAACCAACAACA	AACAAAAACAAAAACCACAAAACCAAACCCAAAAAACACAACCAAAACACAAAAAAAACACAAAAC
48	20201010-F-1	F	Figure 1 / No Training / 48	AAAACACCAAAACAAACCACACCACAAAACAAAAAAAAAAAAAACCCAAAAAACAAAACAAAAAACCAAAAAAAAA	AACAAAAACACAAAAAAACAAAAACAACAAAAACCACAAACAAACACCAAAAAAAAAAACACCAAAACACCAACACAA
49	20201010-G-1	G	Figure 1 / No Training / 49	ACAAAAACAAAA	CAAAACAAACAACA
50	20201010-H-1	H	Figure 1 / No Training / 50	AAAAACCAAAAAAACAACA	ACAAAACACAAAACAACAACAAAACAAAACCAAACAAAAAACAAACA

## Sheet: 1 cycles
	Figure 2
	Male parent: SS00864-Gal4; Female Parent: UAS-CsChrimson
	Training protocol: Paired training; repeated 1x
Number	Animal ID	Apparatus	File Path	Naive decision sequence	Post train decision sequence
1	20200914-B-1	B	Figure 2 / 1 cycles / 1	AAAAAAACAAACCAAACAAAAACCAAAAACAACCACCAA	AAACAAACAAAACCAAAAACACAAAA
2	20200914-B-2	B	Figure 2 / 1 cycles / 2	AAAACAAAACAACAAAAACCAAAAAAAAACACACACACCAAAACCAAAAAAAACAAAACAACACA	ACACACAAAAACCAAAAACAAAAAAACAAAACAAACAACA
3	20200914-C-1	C	Figure 2 / 1 cycles / 3	ACAAAACAAAAAACAAAACCACAAAA	CCCAACCACACAAACCCCAACC
4	20200914-C-2	C	Figure 2 / 1 cycles / 4	AAAAACAACACAACAAA	AACA
5	20200915-B-1	B	Figure 2 / 1 cycles / 5	ACAAAAAAAA	CCCCAAACCAACACAAACCCAACCAACACACCAAAAAAACCCACAAAAAAACCCACCCCCAACAC
6	20200915-B-2	B	Figure 2 / 1 cycles / 6	AAAAAAAAACAAAAAACAACAAAAACACAACAACACACACAACCAAACCAACACCCAAACAAA	AACACAAACCAACCACAAACAAACACAAACCCACCCAACAAAAACCACACCAAAAACAACAAAAACACAAAAAAA
7	20200915-C-1	C	Figure 2 / 1 cycles / 7	ACAA	AACAA
8	20200915-C-2	C	Figure 2 / 1 cycles / 8	AAAAAAAAACCACCCCAAACCAAAAAAA	AAACA
9	20200915-D-1	D	Figure 2 / 1 cycles / 9	AAAAACACCA	AAAAAACAAACAAACCACAACACAAAAAAAACAAAACCAACACAAAAAAACAAAA
10	20200915-D-2	D	Figure 2 / 1 cycles / 10	AAAAAACAACAACAAACCAAAAAACCCAAAAAAAACACCACAACAA	ACAAACCAACAAACCCCCCACCACAAACCAAAACACCACACCCCAA
11	20200915-E-1	E	Figure 2 / 1 cycles / 11	AAACACA	AAC
12	20200915-E-2	E	Figure 2 / 1 cycles / 12	AAACAAACAAAAAAACAAC	ACAAAAA
13	20200915-F-1	F	Figure 2 / 1 cycles / 13	AAAAACACACACAA	ACCCACCACCCAACACCAAACCCACA
14	20200915-F-2	F	Figure 2 / 1 cycles / 14	AACACAAAC	AACACCCCAAAAACAAACAA
15	20200915-G-1	G	Figure 2 / 1 cycles / 15	AAAAACA	AAAAA
16	20200915-H-1	H	Figure 2 / 1 cycles / 16	AAACCAACCAAAAACAAAACAAAACAAACC	AAAAAACAAACCAAACAAAACACACAAAACCAAAAAAAC
17	20200916-B-1	B	Figure 2 / 1 cycles / 17	AACAAAACAACAACAA	AAAAAACAACC
18	20200916-B-2	B	Figure 2 / 1 cycles / 18	AAACAACAAAA	AACCCCACACACCACAACACACAACAACCACAACCCCCACCCCC
19	20200916-D-1	D	Figure 2 / 1 cycles / 19	AAAAAAACCAACACACAAACCAAACCACCCAAACAACAAAAAAAAAC	AAAACAAACAACACCAACCAAAACAAACCAACCCAAACC
20	20200916-D-2	D	Figure 2 / 1 cycles / 20	AAACAAAAAAAAAAACCCAAC	CAAACAA
21	20200916-E-1	E	Figure 2 / 1 cycles / 21	AAAAAACCAA	AAAAACCACCCAACAACAAACACACCACCCACACCC
22	20200916-F-1	F	Figure 2 / 1 cycles / 22	AAAACACAA	CAAACAAA
23	20200916-G-1	G	Figure 2 / 1 cycles / 23	AAAAA	AAAACAAAAAA
24	20200917-B-2	B	Figure 2 / 1 cycles / 24	AAAAAACCAACACAAACAAACACCAACAAACCAAAACCAACAAAACAAAAAAACCAAAAA	AAACACCAACACCAACCCACAACACCAACC
25	20200917-C-1	C	Figure 2 / 1 cycles / 25	AAAACAAAACC	AAAACA
26	20200917-C-2	C	Figure 2 / 1 cycles / 26	AAAAACCAAAACACACACAAAAACACACACAAAAAAACAAACCAAACAAAAAAA	AACCAACAAAACAAA
27	20200917-D-2	D	Figure 2 / 1 cycles / 27	AAAAAAACAAACAAACAACCAACCAAAACAAACCAACAAAACAACCACAAAC	CAAACCAAAAAAACCC
28	20200917-E-1	E	Figure 2 / 1 cycles / 28	CAAAAAAACCAAAAACCAAAAA	AAAAAACAC
29	20200917-G-1	G	Figure 2 / 1 cycles / 29	CAACA	ACCCACACC
30	20200917-H-1	H	Figure 2 / 1 cycles / 30	AACAA	AAAC
31	20200918-B-1	B	Figure 2 / 1 cycles / 31	ACAA	CAACCCCACAACAACACCACAACACAACACCCACACACCCCCCCAAAACCCACACCAACACCAACACACAAC
32	20200918-B-2	B	Figure 2 / 1 cycles / 32	AAAACAAAAAAACACCAAAA	AAAAAACCAAAAACCCAAACCAC
33	20200918-C-1	C	Figure 2 / 1 cycles / 33	AAAAAACCAAACAAAAAAAAACAACCA	AAACAA
34	20200918-E-2	E	Figure 2 / 1 cycles / 34	AAAACCAAC	CCAAAACAAACACAC
35	20200918-F-1	F	Figure 2 / 1 cycles / 35	AAAAACCAAACAAAAAAACCACAAAAACACACAAAAAAAACA	CAAACAAA

## Sheet: 2 cycles
	Figure 2
	Male parent: SS00864-Gal4; Female Parent: UAS-CsChrimson
	Training protocol: Paired training; repeated 2x
Number	Animal ID	Apparatus	File Path	Naive decision sequence	Post train decision sequence
1	20200730-B-1	B	Figure 2 / 2 cycles / 1	AAAAACAAAAAAAAAAAAAACAACAAAACCAACACAAAAACCAAAACACAAACCCACAAAAAACACCACACACAAAAACCAAACCACAAAAAA	AAACACAAAACCAAAACCACAAACAAAAAAACCACAACAAAAAACACACAACACAACACACCACACCCAAAAACCAC
2	20200730-D-1	D	Figure 2 / 2 cycles / 2	AAAAAAACACCAAAAAACAACACAAAAAACAACCAAACAAAAAACAACCAACC	AACCAA
3	20200730-F-1	F	Figure 2 / 2 cycles / 3	AAACAACAAACACAAAAACAAACCACAACAAA	CAACCCCCCCCCAAACCAAAAACACCCCAACCACCCAAACCCACAAAACAAAAAAACCCCCAACACCACAACCAAAACAAACAAAAAACAACCCACCCCCACCCAA
4	20200730-G-1	G	Figure 2 / 2 cycles / 4	AAACAAAAACACAACAACCAAAACCCAAAAAAAACCACACCACAACAAA	AACCAAAACCAACCCACAAAACCACACAAACCACAA
5	20200730-H-1	H	Figure 2 / 2 cycles / 5	AAAAAACA	AAAA
6	20200803-B-1	B	Figure 2 / 2 cycles / 6	CAAAAAACAAAAA	ACCAACCACCCCAACC
7	20200803-B-2	B	Figure 2 / 2 cycles / 7	AAACAACCAAACACAAAAAACACCAAAAAAAACACACACAACAAACC	CCCCCCCAAAACCAACCAAACCCAACAACCC
8	20200803-C-1	C	Figure 2 / 2 cycles / 8	AACAAAAACAACACAAACAAAAAACA	CAAA
9	20200803-D-1	D	Figure 2 / 2 cycles / 9	AAAAAAAACCACAAAAA	ACAAA
10	20200803-D-2	D	Figure 2 / 2 cycles / 10	AACAACAAACAAAAAAAAC	ACCACCCCCACCCCAACA
11	20200803-E-1	E	Figure 2 / 2 cycles / 11	AAAAACAAAAAAC	CAAA
12	20200803-F-1	F	Figure 2 / 2 cycles / 12	ACACAAA	CAACAAAAAACAACAAAACACAAAAAAAACCAAA
13	20200803-G-1	G	Figure 2 / 2 cycles / 13	AAAAAAACAC	ACAA
14	20200807-B-1	B	Figure 2 / 2 cycles / 14	AAAAACAAAACAAAACAACACAAACCAAACACAAAAACAAAAAACAAAAACACAAA	ACAAACACAACCCACACACCCCACCACCAACCCAACACCCCCACCAAAACACAAAACAC
15	20200807-B-2	B	Figure 2 / 2 cycles / 15	AAAAACACAAACACAACCAAAAACCAAAAAACACACAACCAAACACAAAAAAACAAA	CCCCCCCCCCAAAAACAAACACAAACCCCACA
16	20200807-C-2	C	Figure 2 / 2 cycles / 16	AAAACAACACAACAAAAAAACCA	ACAACAAAACACCAAAAA
17	20200807-D-1	D	Figure 2 / 2 cycles / 17	AAAAACCAA	AACAAAAAA
18	20200807-E-1	E	Figure 2 / 2 cycles / 18	AAAAAACAAA	CAACCCAACAACA
19	20200807-G-1	G	Figure 2 / 2 cycles / 19	AAAAAACAAAAAACACAAAACAAACCAAA	CCACACCCCCACCACCCCC
20	20200807-H-1	H	Figure 2 / 2 cycles / 20	AAACAACAAAA	A
21	20200810-B-1	B	Figure 2 / 2 cycles / 21	AACACAAAAAAAACAC	AACAAA
22	20200810-B-2	B	Figure 2 / 2 cycles / 22	AAAAAAAACAAACAACAAAAAACCAAACAAACA	CCAAAACACCCACCAACAACACCAAC
23	20200810-C-1	C	Figure 2 / 2 cycles / 23	ACAAAAAAA	AAACAA
24	20200810-C-2	C	Figure 2 / 2 cycles / 24	AACAAAACACAACCAAAACAAAAAAA	AACA
25	20200810-D-1	D	Figure 2 / 2 cycles / 25	AAAAAAAAACAC	AA
26	20200810-D-2	D	Figure 2 / 2 cycles / 26	CAAAAACAAAAAACAAA	CAACAAA
27	20200810-E-1	E	Figure 2 / 2 cycles / 27	AAAAACACAAAAAAAACACAACACCAAAAACCACAACAAAAAAAAAAAACACAAAACAAAAAA	CCACCCCCCAAACCCCAAAACCACAAAAAACCACCACCCCCCCCCCACCACCACAAAACAACAACACCCACAAAAAAAACACCACCCC
28	20200810-E-2	E	Figure 2 / 2 cycles / 28	CAACAAAAAAAAAAAAAACCACAAAACAAACAACAAACAAACA	CACAACCCACCAAACC
29	20200810-F-2	F	Figure 2 / 2 cycles / 29	AAACAACAACAAAAA	CACAACCACCCAAC
30	20200810-G-1	G	Figure 2 / 2 cycles / 30	AAAACCAAAAA	AACCACCAACCAACCAACACCAACCAAACACACAAACACAAACCCACAACCA
31	20200810-H-1	H	Figure 2 / 2 cycles / 31	AACAAAAAACACAAAAACAAACCAACAAAAACAC	AAAAAAAC
32	20200812-B-2	B	Figure 2 / 2 cycles / 32	AACAAAACAACAAAAAAAACCCAAACACCACAAAAAACCAAACAAACAAAAAAAAA	CACACAACCCCACCCAAAAACAACCCCCAAACACAAACACACCAACAA
33	20200812-C-1	C	Figure 2 / 2 cycles / 33	AAACAAAAAAAAACCAACAAACACAAAAACCAAAAAAACACAAAACAAAACAAAAAACCACAACAAAAAAAAAACAAAAAA	ACCACCCCCAAACCCAACAACACCCACCCACACACACCCCCACCAACCAACAACACAACCCAACCCACCACCAAAAACAAAA
34	20200812-D-1	D	Figure 2 / 2 cycles / 34	CAACAAAAAAAACAAAAACAAAAACAACACAAAAACAAAAAAAAAAACCACCAAAAAACACAACAAAAAAACAACAAAAAAACAAAACCCACCCAAAACAAAAAAA	CACACACAAACAACAAAAACAAAACAAACACACCCAAAACCCACACAAACCAAACAACAAAAAACAACAACAAAAACAACAAAAAAACAACACCAAAACCCCCAAA
35	20200812-E-1	E	Figure 2 / 2 cycles / 35	CAAAACAAAACACAAAC	AAAAACAAAC
36	20200812-F-1	F	Figure 2 / 2 cycles / 36	CAAACAAAAAACACACAAAAACAACACACAAAAAAACAA	CCCAACAC
37	20200813-B-1	B	Figure 2 / 2 cycles / 37	AAAAAACACCACAACAAAAAAA	CCCACCAACACACCCAAAACCAAACCACAACCCACACACC
38	20200813-E-1	E	Figure 2 / 2 cycles / 38	AAACAAAAACAACCAAAAAAAACA	CAAAAAA
39	20200910-C-1	C	Figure 2 / 2 cycles / 39	AAACACAA	AAACACAAACAACAAACAAAACACCAC
40	20200910-C-2	C	Figure 2 / 2 cycles / 40	AACAACAAA	AAA
41	20200910-D-1	D	Figure 2 / 2 cycles / 41	AAACAAACAACAAAACCAAACAAAAAACACCCAAAACA	CCACA
42	20200910-D-2	D	Figure 2 / 2 cycles / 42	AAACAACAACAACAAAAAAACCAACACAAAAACCAAACAACAACAAAAAA	ACCCAAC
43	20200910-E-1	E	Figure 2 / 2 cycles / 43	AACAAACAACAACAA	AAAAA
44	20200910-E-2	E	Figure 2 / 2 cycles / 44	ACAAA	CAACC
45	20200911-F-1	F	Figure 2 / 2 cycles / 45	AAACAAACA	AACCAAAA
46	20201005-B-1	B	Figure 2 / 2 cycles / 46	AAACAAAAAAAAACAAACACAAAAACAAAAAAAACAAAACCAAAAA	CCCACACACAAACACCCACACACAACCAAACCCACCCACCACACAAACAAAACACCCCCACAAAA
47	20201005-B-2	B	Figure 2 / 2 cycles / 47	AAAAAAACAAAACCAAAACACAAAAACAAACCAACAAACAAAAAAACACAAAAACAAAACAA	CCCCAACACCACCACAC
48	20201005-C-1	C	Figure 2 / 2 cycles / 48	AAAACAAAAAACAAACA	AAAACA
49	20201005-C-2	C	Figure 2 / 2 cycles / 49	CAAAAAACAACACACAAAAAACAACCAAAC	CCCACACCCCACCAACACC
50	20201005-D-1	D	Figure 2 / 2 cycles / 50	AAAACAAAACAAAA	CACAACAAACCC
51	20201005-D-2	D	Figure 2 / 2 cycles / 51	AAAAAACACAAACACAAAAAAA	CACAAACAACCCAACACACCCAACAACACCCCCCCACACC
52	20201005-E-1	E	Figure 2 / 2 cycles / 52	AAAACAAACAAAAAAACACAAAAA	AAAAAACC
53	20201005-E-2	E	Figure 2 / 2 cycles / 53	AAAAAAAACAACAAAACAAACAAAAACAAACAAAAA	AAAAACAAACACCA
54	20201005-F-1	F	Figure 2 / 2 cycles / 54	AAAAACAAAAAACACAAAAAAACAAACAAAA	ACAACAAAAAACAAAACAAACCAAACAACAAAAAACAACACAAACAAAAAACAACA
55	20201005-F-2	F	Figure 2 / 2 cycles / 55	AAAAAAACAAAAACACAACAACACAAAAAAAAAAC	ACACAAAA
56	20201005-G-1	G	Figure 2 / 2 cycles / 56	AAAAAACACAAAAAAAAACACCAA	AACAA
57	20201005-G-2	G	Figure 2 / 2 cycles / 57	AAAAACAAAACAACACCAAACAAAACACAAAAAACAACAAAACAAAAAAAAACACACCAAAAA	CAACCAACCCACCACACACAACACCACCCAACCCCCCCA
58	20201005-H-1	H	Figure 2 / 2 cycles / 58	AAAAAAACCAACCAAAACCCACAACA	AACACAACACCACAAAAACCCCCCCAACA
59	20201005-H-2	H	Figure 2 / 2 cycles / 59	CAAAAAACAAACACAAACCAAAAAAAAAAAAAAACAAAAAAAAACACAAAAACCAACACACAAAAAAA	ACAAACACAACACAACCCACACACCCACAACCACACCACCCCCCCCCCAACCCAAACACACACC
60	20201006-B-1	B	Figure 2 / 2 cycles / 60	CAAAAACCAAAAAAAAACCACCAAAAAACAAACAACCCAAACAACCAAAACAACCAAAACAACAAAAAAAACAAAA	ACCACCAAACAAACCCACCCACCCCCACACACCAAACCCCCAACACCCCACAACACCCAAAC
61	20201006-B-2	B	Figure 2 / 2 cycles / 61	AAACAAAACAACAACACAAAAAAACAAAAACAAAAACAAAACACAAACACAACACCAAAACACAAAACCAAAAACACCACAACAAAAACAAAAAAACCCACAAAAACAACAAA	CACACACAACCACAAACCCCCCAAACACCCACAAACAACACAACCCCCAACACC
62	20201006-C-1	C	Figure 2 / 2 cycles / 62	CAAAAAAACACAAACAACAACAAACACAAAA	AAAAAACACAAACAAACAC
63	20201006-C-2	C	Figure 2 / 2 cycles / 63	CAAAAAACAAACAAACCAAACAAAAAAAACAACAAAAACAAAAAACAAAAACAACCAAAACAACCAAAACACCAACAAACAACAAACAAAAAACAAAA	CAAACAAACAAACAACAA
64	20201006-D-1	D	Figure 2 / 2 cycles / 64	AAAAAAAAAACACAAAA	AACCACCACCCCCACACAACACA
65	20201006-D-2	D	Figure 2 / 2 cycles / 65	ACAAAAAACAAAACCAAAAAAACCAAAAAAACACCAAAAAAACCAACCAAAACAAAAAACCAAAACCCAAACCACAAAAACAAAACAAAACCCAACAAAAAAAAAAACCACAAAACAACA	CCCCCAAACCAAACCACCCAACCACCA
66	20201006-E-1	E	Figure 2 / 2 cycles / 66	CACAACCAAAAACAAAACAAAAAACAAAAAAAACAAAACAACCCACCACAACAACAAAAACAAAAAACAAACAACAAACCACCCAACAACAACCACAACCAAAAAAAAACAACAAAAA	ACACCACCAAAAAACAAAACCAACACCCAAAA
67	20201006-E-2	E	Figure 2 / 2 cycles / 67	ACAAAACAAAACAACACAACAAAAAAACACCAAAACACAACAAAAACCAAA	AAAACA
68	20201006-F-1	F	Figure 2 / 2 cycles / 68	CAAAAAACA	ACAAAA
69	20201006-G-1	G	Figure 2 / 2 cycles / 69	CACAAACACAACACAACAAAA	CACAACCACCCACACAACACAAAACACCAACCCAAACACAACAACCCCAACCCCCACCAA
70	20201006-G-2	G	Figure 2 / 2 cycles / 70	AAAACACAAAAAAAACAAAAACAAACCAACAAAAAACCAACAAAACAAACAAACCAACAAAACCAAAACAAAACAACACACAAACAAAACCCAAACCAA	ACACAACACCCAACACCCAACAACACAACC
71	20201006-H-1	H	Figure 2 / 2 cycles / 71	AAACAACAACAC	CACACAAACAAA
72	20201007-B-1	B	Figure 2 / 2 cycles / 72	AACAAAACAAAAAAAACAACAAACAACAACAAAACAAACAACAAACA	CACAAACACAAACAAACAAACACACCAAACAACACAAACCAAAAAAACACACAACACACCACAAA
73	20201007-B-2	B	Figure 2 / 2 cycles / 73	AACAAACACAAACACAAAAAAACAAAAAACCACAACACAACAACAAAACAACAAAAAAAA	ACAAACACCAAAAAAACAAAACCCAAAAACCACAAACAC
74	20201007-C-1	C	Figure 2 / 2 cycles / 74	CACAAACAAACAAACAAACCAAAAAAACAACAAAACAAA	CAACACCACCACCAAAAACAACACCCCAAACACCCAAAAAAAAACACAACACCACAACACCCAACACCACAC
75	20201007-C-2	C	Figure 2 / 2 cycles / 75	AAAACAAAAACAAAAACCAACAAAAAC	CACCCCCAACCACCAACACAACCAACCCCAACCCCCCA
76	20201007-E-1	E	Figure 2 / 2 cycles / 76	AAAAACCAAACAAACAACAACAA	CACACCCCCAAACACACCCAAACAACAAACCACAC
77	20201007-E-2	E	Figure 2 / 2 cycles / 77	CAACAAAAAAAACACAAAACAAAAACACAAACAAAAACAAAAAAAC	CCACAACACCAACAACAC
78	20201007-F-1	F	Figure 2 / 2 cycles / 78	AAAACCCAAACAACAAACAAAAACAAAAACACACACAAAACCAAAAACACAAAAAAAAAACAAAAACAAAAACA	ACACCAACCAAACCCACACCCAAC
79	20201007-F-2	F	Figure 2 / 2 cycles / 79	AACAAACA	AAAACAACA
80	20201007-G-1	G	Figure 2 / 2 cycles / 80	CCAAACAAAAAAACACAAAAAAAAAAAAACACCAAACCAAACAAACAAAACCAACAACAAACAAAAAAAAACACACA	AACACACCACACCAACCACCA
81	20201007-G-2	G	Figure 2 / 2 cycles / 81	AAAAACACCAAACAACACACCAACAAAAAAAACAACCAAAAAACACAAAACCCA	CCCCCCAAACCCAACCCCCCACCCCCAAAAAACAAAAACA
82	20201007-H-1	H	Figure 2 / 2 cycles / 82	CAAAAAACAAAAACCAAAAAAA	CACAAAAAA
83	20201008-B-1	B	Figure 2 / 2 cycles / 83	AAAAAACACAAACAACCAAAACCAAACAAAAAAAACACAACACAAAACAACAAAAAACAAACAAAAACAACACAACCAAAAACAAACAAAACAAACCAAAAAAACAAAAAACACACAAACACAACACCACAACAAAA	ACAAAACCAACCACACCAAAACAAACAACAAACAACAACAAAAAAAACAAACAACAAAAAAAAAACACCAAAACACACAACACAACAAACA
84	20201008-E-1	E	Figure 2 / 2 cycles / 84	AAACAAAC	CAAAACAACAAACACAAAACAAACAAAA
85	20201008-F-1	F	Figure 2 / 2 cycles / 85	AAAAACAACAACAAACACAAAAAACACAAAAAACCAAAAAAAA	AAACCAAAAAC
86	20201008-G-1	G	Figure 2 / 2 cycles / 86	AACAAAAAAAAAAACCAACAACACAAAACACCAAACACAAACCAAAAAAAAAC	CAACCACAACCCACCCCCCACCA
87	20201008-H-1	H	Figure 2 / 2 cycles / 87	AAAAAACCAACAAAACAAAACAAAAACACACAAAACAACAAACACAAACAAACACACAACACAAAAAAAC	ACCACAACCACACACCCAACCACCACCACAACC

## Sheet: 3 cycles
	Figure 2
	Male parent: SS00864-Gal4; Female Parent: UAS-CsChrimson
	Training protocol: Paired training; repeated 3x
Number	Animal ID	Apparatus	File Path	Naive decision sequence	Post train decision sequence
1	20200919-B-1	B	Figure 2 / 3 cycles / 1	ACAAAACAAAAAACAAACAAACAAAACAACAACAAAACCAAAAAAACAA	CAACCCCAACAACAAACCAACACCCCCCCAACACAACACCACACAACCCCCCACAACCAACACCACCAAACAACACAAACCA
2	20200919-C-1	C	Figure 2 / 3 cycles / 2	AAAACACACAAA	AACA
3	20200919-C-2	C	Figure 2 / 3 cycles / 3	AAAAACCAAACAAAAAACAAAACACACAAAAAAAACAAAACAACAAACCACAAAA	ACACAAAAAACACAACACAACAAAAACAACCAA
4	20200919-D-1	D	Figure 2 / 3 cycles / 4	AAACACAACAAAAACAAA	ACCCCAACACAACAACCACAACACACA
5	20200919-E-1	E	Figure 2 / 3 cycles / 5	CAAAAAAACAAAAAACACCAAAACCCACAACCAAAAAAAACAAAACACCACAAACCAA	CAAACCCACCACA
6	20200919-E-2	E	Figure 2 / 3 cycles / 6	AAAAACAACAAAACCAA	AACACCCCCCAACCAAC
7	20200919-F-2	F	Figure 2 / 3 cycles / 7	CAAAAACA	CACCACCCACCCAACACA
8	20200921-B-1	B	Figure 2 / 3 cycles / 8	AAACAAAAAAAAAACAAAAACACACCACAAAAACACAACACAACACACAACACAAACAACCAACAAAACCAACAAAAAAAAACAAA	CAAAAACCCCCAACCACCCACCAAAACACCCAACAAACAAAAAACCCACACACCCACCAACACCCAAACAACCCCACCCCACCCAACCCCCAACACACACCCCAAACCCAAACCAAAAAA
9	20200921-B-2-3	B	Figure 2 / 3 cycles / 9	AACACAAAAAACAAACACACCAAAACAAACA	CACAACACCCCCACCAACCACCCCAAAAAACCACACACCCCAACAAACAAAACACCAAACCCCCAACCCCCACCAAACCACCACCCCCCCCA
10	20200921-C-2	C	Figure 2 / 3 cycles / 10	CACAAAAAACCAAAACAACAAAACACAAAACA	CCCCCAAAACCCACACCCAAACCCCAACACCACCACCCAAAAC
11	20200921-D-1	D	Figure 2 / 3 cycles / 11	CAAAAACAAAAACAAAACACAAAACCACACAAAAACACCCAAACAAAAAAA	CAAACCCAACAAACAACCCCACCAAAAAACAAACCCCAAACAACCAACACCCAAACAACAAA
12	20200921-D-2	D	Figure 2 / 3 cycles / 12	ACAAAAAAAAAACAACCAAACAAACAAACACACAAACCAACACAAAACCA	AAAACCAACCCCACAACCACCAACCACCCACACACCAAACAAAACCACAAACCACCCAAAACCCAACCAC
13	20200921-F-1	F	Figure 2 / 3 cycles / 13	AAACAAAAAA	CACACACCCACCACC
14	20200922-B-1	B	Figure 2 / 3 cycles / 14	ACAACAAAAAAACAAACAAAACCAACAAAACAAA	CAAAACCCACAAACCCAAAAACACCCAACCCCACACCCAACAAACCCCCCACAAAACACAACAAACA
15	20200922-B-2	B	Figure 2 / 3 cycles / 15	AAACACAAAAAACAAAAAACAAAAAAAACAAACCAAAAAAAAACCAACAACAAAAAAACAACACAACCAACAACCCAAAAAACAAACACACACCAAAACAAACAACAAAAAAA	AAACAACAACCCACAAACCACAAACCACAACCCCACCCCAAAAACACAAACACACAAAACAAACCACCCCACCCAACCACCCAAACCCAAACACAAAAAACAACCAAAACAAACCCCCCAA
16	20200922-C-1	C	Figure 2 / 3 cycles / 16	AAACACAAAAACAAACACCAAAA	CCAAAACAAAACCA
17	20200922-D-1	D	Figure 2 / 3 cycles / 17	ACCAAAAAAAAACCCAAAA	AAACACAACACACAA
18	20200922-D-2	D	Figure 2 / 3 cycles / 18	AACAACAAAAACACAAAAAACACACACCAAAAAACAAAACACAAAACACAAAAAACACACCAA	ACCAACCACCCCAAAACCAAC
19	20200922-E-2	E	Figure 2 / 3 cycles / 19	AAAACAAAAAACAAACACACAA	ACAA
20	20200922-G-1	G	Figure 2 / 3 cycles / 20	AACAAAACACACACAAAAAAACA	AACAAAC
21	20200922-G-2	G	Figure 2 / 3 cycles / 21	CCAAAAACAACAAACAAAACACCACAAACAAACCACAACAACACCAAACACCACACCAACCCCAAACAAACAACAAAAAAAAAAAAAACCCAACAAAAAAAAAAAACACCAACAAACAAAAA	CCCAA
22	20200923-B-1	B	Figure 2 / 3 cycles / 22	AAAAAACAAAAAAAAAACACACCAAAAAACCAAAAAAAACAAAAAAAAACCCACCCAAAACCAACACAAAAAA	ACCCACAACCAACAACCCCCAACCAACCCCAAAAAACCCCCCCCACCCACAACCACACCCACCAACCCAACCACACCAACAACCA
23	20200923-C-1	C	Figure 2 / 3 cycles / 23	AACAACAAAAACAAAAAAAACAAAAAAACAACCAAACAAAAAAAAAAAAAACAACACAAAAAAACAAAAACAAAAAAAAAAA	ACCAACAACCAAAAACAAAACCAACCCAAACCCAACCCCACACACCAAACCAAAACCACAACACCCCAACCCAAACCCCAACACCACACCCCACACAAAACACACAAACAAAAAAAACCCAACCAACC
24	20200923-D-1	D	Figure 2 / 3 cycles / 24	AAAAAACAAAACACAAAAAAAAAAAACAACACAACAAAAAAACA	AAACCAACCACACACACAACCCAAACCACCAACCCCAACAACAACCACCCCCACCACAACACAAACAAACCCCACCC
25	20200923-D-2	D	Figure 2 / 3 cycles / 25	CAAAAAAAAACAACAAAA	CCACCCACCCCAACAACCCACCCCCCCCCAACCCACACACAACCCCCACAAAAACAAAAAAAA
26	20200923-E-1	E	Figure 2 / 3 cycles / 26	AACAACAAACAAAAA	ACAAAAAAC
27	20200923-F-1	F	Figure 2 / 3 cycles / 27	AAAACAAAACAAAAACAAAAAAAA	CCACCAACAACCAAAACCCCCACCCACCCCCCAAAAAAACACACCCCAACA
28	20200923-G-1	G	Figure 2 / 3 cycles / 28	AACACAAAAAAAAAAAAAAAAACCCCAAACAAAAAAAAAAAACACA	ACCAAACACCCCACCAAACCCCCCAACCCAAAAAAACCCACCAACCCACCAACCCCACAACAAAAA
29	20200923-G-2	G	Figure 2 / 3 cycles / 29	ACACAAACCAAAAA	CCCACAACACCAACCCCC
30	20200923-H-1	H	Figure 2 / 3 cycles / 30	AAAACAAACAAAAACCCAA	ACAAAACAA
31	20200923-H-2	H	Figure 2 / 3 cycles / 31	AAAAAACAA	AAAACAAAAAAAAACC

## Sheet: 4 cycles
	Figure 2
	Male parent: SS00864-Gal4; Female Parent: UAS-CsChrimson
	Training protocol: Paired training; repeated 4x
Number	Animal ID	Apparatus	File Path	Naive decision sequence	Post train decision sequence
1	20200919-B-2	B	Figure 2 / 4 cycles / 1	AAAAAAAACAACAAACAAAACAAACCAAACCAAACAAAAAAAAACCAACAACCAAAC	CACACCACCAACA
2	20200919-F-1	F	Figure 2 / 4 cycles / 2	AAAAACCAAAAACCACAACAACAAACA	ACCACCAC
3	20200919-G-1	G	Figure 2 / 4 cycles / 3	AAAAAAACAAACAAACAACAAAAA	ACCACACACAACAA
4	20200919-G-2	G	Figure 2 / 4 cycles / 4	AAACACAAAAACAAA	AACCCC
5	20200919-H-1	H	Figure 2 / 4 cycles / 5	CAAAACAAACAAAAAA	AAAACCA
6	20200921-B-2-4	B	Figure 2 / 4 cycles / 6	AACCAAAAAAAACAAAACAAAACAA	ACAAAAACAAACAACCCAAAAACACACCACCCAAACAACCACCAACACACAA
7	20200921-C-1	C	Figure 2 / 4 cycles / 7	ACAACAACAAAAAACAAAAACACAACAA	CCCCCCACCACACCACAACCCCACCCAAACACAAAACCCAAA
8	20200921-E-1	E	Figure 2 / 4 cycles / 8	AAAAACAACACACAACACCACCAACAAAAACAAACAAAACCAAAAACACCAAAAAAA	AAACA
9	20200921-G-1	G	Figure 2 / 4 cycles / 9	AAAACAACAAAACAAAACACAAAAAAACAAACACAAAACAAACAACCAAAACAACA	CAAAAACCCCAAACCACACAACAACCAACACCAAAAACAACACCCAAAACAACAAACAAACACCCACCAACACCAACCCAAACACACCACACCAAC
10	20200924-B-2	B	Figure 2 / 4 cycles / 10	AAAACAACAAAAACAACACAAACAAAACAAACCAAAACAAAAAAAAACACCACCACAACAACAAAAACCCAACAAACCCCAAACAACACCACACAAAAAAAAACC	ACACACAACACAAACAAACAACAAAAACAACAACACACCCCCAAACACCACACAAACAACACCCAACA
11	20200924-D-2	D	Figure 2 / 4 cycles / 11	AAAAAAAACAAAACAAAAAAAACACCAACCCAAAAAACAACACCACAAAAAAAACAAAACACCACACAAACAACCACAAACACAACAAACAAC	AACCCACCAAACCCAACAACACAAAAACA
12	20200924-E-1	E	Figure 2 / 4 cycles / 12	AAAAACACAAAAACAAAAAAAACACACAAAAC	ACCAACCAAAAACCCCCAAACA
13	20200924-E-2	E	Figure 2 / 4 cycles / 13	CAACCAAAAAAAAAAAAAACCACAAAAAACCACACAAA	ACCCCCAAAACACCCAAA
14	20200924-F-1	F	Figure 2 / 4 cycles / 14	AAAAACACAACACAAACCACAAAAACAACAACAAA	CAAACCAACACCAACCCACACCACAAAAACCACACCAACACCCCCCCCAAAACCCACCCCCACACCCACCCCACACCACAACAACACAAA
15	20200924-F-2	F	Figure 2 / 4 cycles / 15	AACAAAAACCAAAA	CCACCCAACAAACAAAACCCAAACAACCCCAACAACACCACAACCACCAAAAAAACACAAACCAAC
16	20200924-G-2	G	Figure 2 / 4 cycles / 16	ACAAAAAACCAAACAAAAAACACCCAAACAAACAACAACA	AAACCACCACCCCCA
17	20200924-H-1	H	Figure 2 / 4 cycles / 17	ACAACAA	AAACACAA
18	20200924-H-2	H	Figure 2 / 4 cycles / 18	CCAAACAAAACAAAAAA	ACCCCAAAACAACCACAACCCCACAAACCCCACCAACCAACAAACAACCACCCAACAAACCACA
19	20200925-B-1	B	Figure 2 / 4 cycles / 19	AAAAACCAAAAAAAC	ACACCCC
20	20200925-B-2	B	Figure 2 / 4 cycles / 20	AAAACAAAAAACAAAAAACCACAAACA	CCAACACCCAACCACAAACACCAACACCACACCCCACCACCAA
21	20200925-D-1	D	Figure 2 / 4 cycles / 21	AACAAAAAAACAAAACCACAACAAAAAACAAA	ACACAAAACCACCCCACAACCAACCAACCAAAACCACC
22	20200925-E-1	E	Figure 2 / 4 cycles / 22	ACAAACAAAAAACAAAAAAACA	ACACACACACCCCACCAAACAAAACACAAAACACCCCCC
23	20200925-F-1	F	Figure 2 / 4 cycles / 23	CAAAAAACAACACCCAAAAAACAAAACAACAAAAAAAAAA	CACCCAACACAACACCAAACAACCCAAAACCAAAACAAACCAAAACAACCACCCCCAACCCACAACAAACCACACACCAACCACACAACAACCCC
24	20200925-G-1	G	Figure 2 / 4 cycles / 24	CAACAA	ACACCACCCCCCC
25	20200925-H-1	H	Figure 2 / 4 cycles / 25	CAAAA	AAAA
26	20200928-B-1	B	Figure 2 / 4 cycles / 26	ACAAAAA	AACACCAC
27	20200928-C-1	C	Figure 2 / 4 cycles / 27	AACAAAAAACAAAAAA	CCAAAAAAACAAAA
28	20200928-C-2	C	Figure 2 / 4 cycles / 28	AAAAACACAAAAAACCAAAAACCAAAACAAC	AAAAAACACCACA
29	20200928-D-1	D	Figure 2 / 4 cycles / 29	CAAAAAAAACCAAAAAACAAACAACAACAAACAAAAAAA	AACCCAACACAACCAACCACCCCACCACCCCCCCCCCACCCACACCCCCACCACAACCCCCCACAACACCAAAAACAC
30	20200928-E-1	E	Figure 2 / 4 cycles / 30	AAACAAACA	ACAAAA
31	20200928-F-1	F	Figure 2 / 4 cycles / 31	AAAAAACACAACCAACAA	CCCACCA
32	20200928-G-1	G	Figure 2 / 4 cycles / 32	AAAC	CCAACACCCCCAAAAC

## Sheet: 5 cycles
	Figure 2
	Male parent: SS00864-Gal4; Female Parent: UAS-CsChrimson
	Training protocol: Paired training; repeated 5x
Number	Animal ID	Apparatus	File Path	Naive decision sequence	Post train decision sequence
1	20200729-B-1	B	Figure 2 / 5 cycles / 1	ACAACAAAAAAAACACAAACAAAACACAAAACAAAAACACAACAAAAACCAAACAACACCAAACAAAAAAACCAACAAACAAAAACCAAAAACACCACCAAAAAAACACAAA	CCCAACCAA
2	20200729-B-2	B	Figure 2 / 5 cycles / 2	AAACAAAAAAACAAAACAAACAAAAACAACACAAAAACAACACACAAAACAAAAACACCAAAACCAACAAACAACAACAAAAAAACCCAAACACACAACAACACAAACACAAAAAACAAAACAAAAAA	CCAACCAACCACCACACACCCCAAACCCACAAAACACAAACACCCACCCAACCCCAAACAACAACAACAAAACACACACCCCACCACAAAACACAACACCAA
3	20200729-C-1	C	Figure 2 / 5 cycles / 3	AAAAACAAACAAACAAAAACCAAAAAAAAAACAAAACAAAAAAAACAAAAACAAAA	CCCCAACAACACAAACCAAACCCCACAAAAAAAACCAACAAACAAACCAAACCCAA
4	20200729-C-2	C	Figure 2 / 5 cycles / 4	AAAACAAAACCAAAAAAACCAACCACACACCCCACACAACAAAACCCCAAACCAAAACAAACACAACAAACACCAAAAAAAAAAACAAAA	CAACACAAACACACACCCCAACCAAAAACACCAAAACCACCCCCCCAAAACACCCAACACAACAA
5	20200729-D-1	D	Figure 2 / 5 cycles / 5	AAACAAAACA	CCCAAAACAACACCCCCCCCCAACCACCACAAAAACAACAAACAAACCCAAACCCACAAAACACCCACAACCCCCA
6	20200729-E-1	E	Figure 2 / 5 cycles / 6	CAAAAAAA	ACACACACCA
7	20200729-F-1	F	Figure 2 / 5 cycles / 7	AACAAAACCAAAAAAAAACCAACACAAAAAAACAACCACAAAAACAACACACAAAAAAAACCCCAACACAAAAAA	ACCACCCCCCCAAAAAACCACAAACACCCCCACACCAAAAAACACCACCCCAACCAACCCACACAACAAACACCC
8	20200729-G-1	G	Figure 2 / 5 cycles / 8	ACAAACACCAAAAAAAAACCAAAAACCAA	AAAACCAACCCACAACCCACAAA
9	20200911-B-1	B	Figure 2 / 5 cycles / 9	AAACAAAAAAACCAAAAACACAAACCACAAAACCAAACAAAAAACAAACAAAAAAACAAAACACCACAAACAACACCAAACACCAAACAAA	CCAAACCAACAACCCACAACCCAACCCACCAACCCAAAAACACCACAACACACAAACAAACCAAACACCCCAACAACCAACCAAACAACAACAACCCC
10	20200911-C-1	C	Figure 2 / 5 cycles / 10	AAAAAAACCAAAACCAAAACCAAAAAACAACCAAAAAAAACACACCAACACAACA	CCACACAC
11	20200911-C-2	C	Figure 2 / 5 cycles / 11	ACCAAAACAACAACAAAACAAAACACA	CCACACCCCACCAACAAAC
12	20200911-D-1	D	Figure 2 / 5 cycles / 12	AAAAAAAAACCCACAA	CCCAAACACC
13	20200911-E-1	E	Figure 2 / 5 cycles / 13	AAACA	CACCCAAA
14	20200911-G-1	G	Figure 2 / 5 cycles / 14	AAAACCAAAACCAACAAAAACACAAACACCAAAA	CCCACAA
15	20200911-H-2	H	Figure 2 / 5 cycles / 15	AAAAAAACAAAAACACCACAAC	ACAAA
16	20200917-B-1	B	Figure 2 / 5 cycles / 16	AAAAAACAACAACAAA	AAACCCACCAACACCCCCCCCAA
17	20200917-D-1	D	Figure 2 / 5 cycles / 17	ACAAACAAAAACAAAACAA	CACCACACCAACCCAAACAAAAACACCCACAAAACCCC
18	20200917-E-2	E	Figure 2 / 5 cycles / 18	AAAACAACACCAACCAAAAAAAAAACACAAA	AAAACCAACCCCCCAACAACACAACACAACCCCCAACACCACAACCCC
19	20200917-F-2	F	Figure 2 / 5 cycles / 19	AACAAAAAACCACCAAACAAACAAAAACAACACAAACACACAAAACAACAAACAACAAAAAAAAAACCACAAAAAA	AAAACAACAACAACAACCCCCAAACCAAAAACCCCACCACCACAAAACACCC
20	20200917-G-2	G	Figure 2 / 5 cycles / 20	AAAAA	CCACACACACAAACCCACACACAAC
21	20200918-C-2	C	Figure 2 / 5 cycles / 21	CAAAAACAACCAACACACAAAAACCCACAAACCCCCAACCACACCCACAAAAACACAAAAAAAAAAA	AAAAAACAACCAAACCACAACCACA
22	20200918-D-1	D	Figure 2 / 5 cycles / 22	AAACAAAAAACACCAAACCACCAAAAA	CAAAACA
23	20200918-D-2	D	Figure 2 / 5 cycles / 23	CCAAAAAACAAACAAACACAACACCAAAAAAACCAAAAAAACACCAAAAA	ACAAAACAAAACCACAAACCAACCCCAAAACAAAACCACCCAACACCCC
24	20200918-E-1	E	Figure 2 / 5 cycles / 24	AAAAAACAACAAACCAAA	CAAACCC
25	20200918-F-2	F	Figure 2 / 5 cycles / 25	AAAACCCAAAAACCAAACAAAA	ACAAACCCCCACCAAACCACACACCCAAC
26	20200918-G-1	G	Figure 2 / 5 cycles / 26	AAAACAAAAACCACAAACCAACAAAAAAACCAAA	CCCAACACA
27	20200918-H-1	H	Figure 2 / 5 cycles / 27	AAAACAAAAACAAACACAAAACAAACAAAAAACAAAACAACAAACAAACAAACCAAC	ACCCAC
28	20200918-H-2	H	Figure 2 / 5 cycles / 28	AACAAAAACAAACCACAAAAACA	CCCCCCAAA
29	20200924-B-1	B	Figure 2 / 5 cycles / 29	ACAAAAAACAACAACAAAAACAAAAACAAAAAAAAACAAAAAAACAACAAAAA	AAAAAACCAACACACAAAAACAAAAAACAAA
30	20200924-C-1	C	Figure 2 / 5 cycles / 30	CAAAAAACCAAAAAACACAAAAAAAC	ACCCAA
31	20200924-D-1	D	Figure 2 / 5 cycles / 31	AAAAACAAA	CACCCCACAC
32	20200924-G-1	G	Figure 2 / 5 cycles / 32	AACAAACAA	CCACAAAACACACCCACAAACACACC
33	20201011-B-1	B	Figure 2 / 5 cycles / 33	CACACAAAAACAAACAAAAAAAACCCACAACACAAAAAACACAAACAAAACAAAACAAAAAACAAAAA	CAACCACCCAACAAACACAAACACCAACCAACACCAAACACCACACCAACAACACCACCAAAACCCCAACACCCCAAAACCACC
34	20201011-C-1	C	Figure 2 / 5 cycles / 34	AAACAAAACAAAAAAAACAAACAAAAACAAAAAACACAAAAACAAAACCAAAAAACCAAAACAAAAAA	CAACACCCACAAAACAACCCCAACACCAACACACCAACCACCAACCC
35	20201011-D-1	D	Figure 2 / 5 cycles / 35	ACAAAACAAACACAACAAAACAACAAAAAACACAAAAAAACACAAAAAAACAACCAAAAACAAAA	ACCCACCCACACAAACCAACAACCACCACCCACCACACCCAACACACCACACCACCCACCAAAAAACCCCAAAACAC
36	20201011-E-1	E	Figure 2 / 5 cycles / 36	AAAAACAAAAAAAACAAAAAACACCCAAAAACACCAAAACAACAAAAAAAACCAAAAAAAAACAAACCACCAAAAAAAAAACACAAACAAACACAAAAAAACACCAACAACAAACAAACAAAAAAC	AAAAACCACCCCCACACACACCCACCCCACCCAAAACCCCAACACACCACCACACACA
37	20201011-F-1	F	Figure 2 / 5 cycles / 37	CAAAACAACACAAAAAAAA	ACAA
38	20201011-G-1	G	Figure 2 / 5 cycles / 38	AAACCAAAAAAACAAACAAAACCAACAAAAAAAAACAAAACAACAAAACACACAACCAAAAAAAAACACACACAAC	ACACCCACCACCACACA
39	20201011-H-1	H	Figure 2 / 5 cycles / 39	ACAAAAAACAAAAAACCACAAAAAAAAAAACACAACAAAAAAACACAAAAAACAAAAAAAAACCAAAAAACAAAACAAACAACCACAAAAAAAAAACACACAAAAAAAAACACAAACAAA	ACCCCACCCCAAACACAACACCCAACCAACCAACCCAAACCCCCCC
40	20201012-B-1	B	Figure 2 / 5 cycles / 40	AAAACAAACACAAAACACAAAAAAAAAACAACCACAACAAAACCACAAAAAAAACACAAACAAACAAA	CCACCC
41	20201012-B-2	B	Figure 2 / 5 cycles / 41	AAAAACCACAAAAAAACAACAAACCAAAAAAACACCAACAAAAAAACCAAAAA	CCCCCAACACAACAACAACCAAAACCAC
42	20201012-C-1	C	Figure 2 / 5 cycles / 42	AAAACACCAAAAAAACAAAACACAAAAACACAAAACACAAAAA	CCACCCACCAACCAACACA
43	20201012-D-1	D	Figure 2 / 5 cycles / 43	AACAAAAAACCAAACCAAACAAAAAAAACCCAACAAAAAAAAACACAAAAACAAAAACAAACCAAACAAACAAAAAACAAACCACCAAACAC	CAACAAACACCACCACAAAACCAACACCCAAACACCCACAACCA
44	20201012-D-2	D	Figure 2 / 5 cycles / 44	AACAAAAACAAAAAACACAACAAAAAACAAAAAACAACCACAAAAAAAAACAAAACAAAAAAAAACCAAAAAACCAAAACAAAAAAAAACACCCACCAAAAAAAAACACAAAAAAACACACC	AACCCCCCCCCAAAAAAACCAAAAACAACCCAACCACCCAACAAC
45	20201012-E-1	E	Figure 2 / 5 cycles / 45	CAAAAAAAACACCAAAACAAAAAAAAACCAAAAACCAAAAAAACAAACACAAAAACCAAAACCCAAACAAAAAACAAAACAAAAACAACAA	CACCAAACCAACACACACACCAA
46	20201012-F-1	F	Figure 2 / 5 cycles / 46	AAAAAAACAAAACACACACAAACAAAACACCAAACAAACACAAACCACCCCACAACAACCCAACCACAAACAACCACCAACCAAAACACCCCACAAAAAA	AAAAAAAAAC
47	20201012-F-2	F	Figure 2 / 5 cycles / 47	AAACAAACAAAACCAAAAAAACACAACAAAACAAACAACA	AACCACACCCAACAACAAACCAACAAACCCACCC
48	20201012-G-1	G	Figure 2 / 5 cycles / 48	CAAACAACAAAAACCAAAAACACAACAACAAAAAAAAA	AACAA
49	20201012-G-2	G	Figure 2 / 5 cycles / 49	CAAAACAAACAAAAAACAAAAA	CAACCCAACACAACCAACCAC
50	20201012-H-1	H	Figure 2 / 5 cycles / 50	AACAAAC	AACCAAAAAC
51	20201013-B-1	B	Figure 2 / 5 cycles / 51	AACAACAAACAAACAAACAACAACAACAAAACAAAACAAAAAAAACAAACCAAAAAAAACAAACAACACCAAAACAAAAAAC	CCCAACAA
52	20201013-B-2	B	Figure 2 / 5 cycles / 52	AAAAAACAAAACCACAAACAAACAAACAAAACCAAAAACAAAAAACAAAAAACCAAAAAAAAAACAAAACAAAACAACAAAAAAACCAAAACAAAACA	ACCCACCAACCAACCAAAAACAAACCACCAAACAAAAAAAAACACCAAACCACCCCCACACCCAACCACAACCACACACAAA
53	20201013-C-1	C	Figure 2 / 5 cycles / 53	CAAAAACAAAAACACAACAACAAAAACAAACCAAAACAACCCACCAAAAAAAAACAAAACCAAACACAAAAA	CCAAACAACCACACCAACAACCC
54	20201013-D-1	D	Figure 2 / 5 cycles / 54	CAAAAAAACAAAAACAAAC	AAAACCAACCAACACCACAAACCACACCCCACC
55	20201013-D-2	D	Figure 2 / 5 cycles / 55	CAAAAAAAAAAACCAAACACAAAACAAAAAACAAAAACCAAACCACAAAACCAACAAAAAACAACCCAAAAAAAACAAAACAAAACCAACCCCAAACACCACCA	CCCCAACCACACAAAAACCAA
56	20201013-E-1	E	Figure 2 / 5 cycles / 56	AAAAAACCAAAAAAACAAACAAAACAAACACAAAACAACACAACAAAAA	ACCAAAACCAAAA
57	20201013-F-1	F	Figure 2 / 5 cycles / 57	AAAACAAAACAACAAAAAAAAACAACACAAACACACAAAAAACAAAAAAAACAAAACAAAAAAACAAAACA	AAAAAACCCCAAACCAACCCACCCACCCACCAAACACCCCCACACACCCACACAAAAAACAACCCCAACCACACACACCACA
58	20201013-G-1	G	Figure 2 / 5 cycles / 58	AACCAAAAAAAACCACAAAAA	AACCCCCAACACAAACCA
59	20201013-H-1	H	Figure 2 / 5 cycles / 59	AACAACAACA	CAAC
60	20201014-B-1	B	Figure 2 / 5 cycles / 60	AACAAAACACAAAAACCAAAAAAACAAACAAAAACAACAAACCAAACAAAAACCACAAAAAAACCAAAACCCAACAAAAACAACA	ACAAAACACCACAAACCACCCCAAACCCCAACACAACAACCCAAAAACCCACAAACCCAAA
61	20201014-D-1	D	Figure 2 / 5 cycles / 61	AAAACACACAAAAAAAAACACAAACAACAAAAAAAACCACAAAAAAAACAAAAAAAAACCAACACAAAAAAACAAAAACACACAAAACAACAACACACACAAAAAAAAAACCACAACACAACACAAAAAACC	CAACCCAAAACAAAAACCACCCAAACAACCAACCCCC
62	20201014-G-1	G	Figure 2 / 5 cycles / 62	AAAACAAAAACCAAACACCAAAAACAAAACAACCAAACAACA	CCACAACCACCAAACACCCCACAACACAC

## Sheet: 10 cycles
	Figure 2
	Male parent: SS00864-Gal4; Female Parent: UAS-CsChrimson
	Training protocol: Paired training; repeated 10x
Number	Animal ID	Apparatus	File Path	Naive decision sequence	Post train decision sequence
1	20200722-B-1	B	Figure 2 / 10 cycles / 1	CAAAAAAAAA	CCACAACACC
2	20200722-B-2	B	Figure 2 / 10 cycles / 2	ACACAAACCCACCAAAAAAACCAAA	CCCCCCACACCAAAACCCCAAACCCACACCAAACAACACCACACAAACCACAAACAAACAACAAAAACCCCAAACAC
3	20200722-C-1	C	Figure 2 / 10 cycles / 3	AAAACAAAAAAAAAACCAAACACAACAACCCCAAACAAACAAACCCACACACCCAAAA	ACCCAAACCACC
4	20200722-D-1	D	Figure 2 / 10 cycles / 4	AAAAACACAAAAAAAA	CAAAAACCCCAA
5	20200722-G-1	G	Figure 2 / 10 cycles / 5	AAAAAACACACAAACAA	CCCA
6	20200722-G-2	G	Figure 2 / 10 cycles / 6	AAAAAACAA	ACAACCCC
7	20200722-H-1	H	Figure 2 / 10 cycles / 7	AAAACAAACCAAAAAA	CAACAC
8	20200723-B-1	B	Figure 2 / 10 cycles / 8	AAACCACAACAACAAAACAAAAAAAAACAAACAAAAAAAAAACACAAACAACCAA	ACACAACACCCACCCACCACCACCAACACAAACA
9	20200723-E-1	E	Figure 2 / 10 cycles / 9	AAAAAAACA	CACCACACCAACACAACCCAAA
10	20200724-B-1	B	Figure 2 / 10 cycles / 10	AACAAACACACCAAAAAAACAAAAAAAAAACAACACACAAACCACAACCAAACAAAAACAAAACAA	ACCACAAACCCCAAACA
11	20200724-D-1	D	Figure 2 / 10 cycles / 11	ACCAACAAAAAACCAAAACCCAAAAAAACAACAAA	CCCAAACCACAACACCCCAACACAACA
12	20200724-D-2	D	Figure 2 / 10 cycles / 12	AAAAACAACACCAAACAAAAAACAAC	ACAAACCCCAACCCCCCCCAAAAC
13	20200724-E-1	E	Figure 2 / 10 cycles / 13	ACAAACCAAAACCAAAACACCAAAACCAAACAAAAAAA	ACACAAACAACAACCACAACCCCACACAAACCACACC
14	20200724-H-1	H	Figure 2 / 10 cycles / 14	AAAAAAA	CACCACCA

## Sheet: 20 cycles
	Figure 2
	Male parent: SS00864-Gal4; Female Parent: UAS-CsChrimson
	Training protocol: Paired training; repeated 20x
Number	Animal ID	Apparatus	File Path	Naive decision sequence	Post train decision sequence
1	20200618-B-1	B	Figure 1 / Paired / 1	AACAAACA	CAACCACAAC
2	20200618-C-1	C	Figure 1 / Paired / 2	AAAA	CACCACACCCCCCCACAAACCCACCACA
3	20200618-D-1	D	Figure 1 / Paired / 3	CACAA	CACAACACCCCA
4	20200618-E-1	E	Figure 1 / Paired / 4	AAACAACAAAAA	CCACCACAA
5	20200618-G-1	G	Figure 1 / Paired / 5	CAAACACAAAAACAAA	CACACAACAA
6	20200708-B-1	B	Figure 1 / Paired / 6	AAAAACCAAAAC	CAACCAACCCACCCACCAACACAACACCAAAAACCAAAAACCCACACAA
7	20200708-D-1	D	Figure 1 / Paired / 7	AAACAAAAAACA	ACAACCACCAACAC
8	20200708-E-1	E	Figure 1 / Paired / 8	AAAAAAACCCAAAACA	CCCACCAAC
9	20200708-E-2	E	Figure 1 / Paired / 9	AAAACACAACACAAA	CCCAACACACAAACC
10	20200708-F-1	F	Figure 1 / Paired / 10	AAAAAAA	CCCACCACCACACCAACAACACAACCCC
11	20200708-F-2	F	Figure 1 / Paired / 11	AAACACCAAAAACCCAAAAAA	AAACCACACACACCCCAA
12	20200708-G-1	G	Figure 1 / Paired / 12	AACAAAACA	AAACCACCCCCA
13	20200708-H-1	H	Figure 1 / Paired / 13	AAAAACCAAAA	CCACACAC
14	20200720-B-1	B	Figure 1 / Paired / 14	AAAAAAAACACCAACAAAAACAACACCAAAC	CACAACCCAACAAACAACAAAAAAAACCACCCCCCCACCCACAAACCCCAAAA
15	20200720-B-2	B	Figure 1 / Paired / 15	AAAAAAAAACAACAAC	ACCACC
16	20200720-C-1	C	Figure 1 / Paired / 16	AAAACACCAACAAAAACAACACCAAAAAACCCACACACAAAAAACAAAAAACCAACAA	CACACCCAC
17	20200720-C-2	C	Figure 1 / Paired / 17	AAAACCAA	AACCCACA
18	20200720-E-1	E	Figure 1 / Paired / 18	AAAAAAAAA	CAACAACACCCCCAACCACCAACACA
19	20200720-E-2	E	Figure 1 / Paired / 19	ACAAACACAACCACAAAAAAA	ACCACCA
20	20200720-G-1	G	Figure 1 / Paired / 20	CAAAA	CA
21	20200720-H-1	H	Figure 1 / Paired / 21	ACAAAAAAAAAACAACAA	CCCACACCACAAC
22	20200720-H-2	H	Figure 1 / Paired / 22	AACACAAACCAAAAAAAC	CAAC
23	20200811-B-1	B	Figure 1 / Paired / 23	AAAAAACAAACAAAACAAAAAAACAAACAACCAAAAAAAACAAACCACAAAAAA	ACCAAACCCCCAAAAACACCACCACCAAACCCCCAACC
24	20200811-C-1	C	Figure 1 / Paired / 24	AAAAAACCAAACAAAA	CAAACACCCACACAACAACCAACAACCAAACCACCACCCAAACCCACACAAAAACAACACACCAACAA
25	20200811-C-2	C	Figure 1 / Paired / 25	AAAAAAAAACACCAACA	CACAACCAC
26	20200811-D-1	D	Figure 1 / Paired / 26	AAACAAAAACAACAAAAAACCAAACCAACAAAACCAAAAAA	CACACACACAACCAAAACCAACCAACCACCCCACCCCACACCCACCCAAAAAAACACCAACA
27	20200811-D-2	D	Figure 1 / Paired / 27	AAAAACAAAACACAAA	CACCAACCCACAC
28	20200811-E-1	E	Figure 1 / Paired / 28	AAAACAAAACAAACAACAAACA	ACCACAACCA
29	20200812-B-1	B	Figure 1 / Paired / 29	AAAAAACCAAAAACCAAAAAA	CCAAACCCCACACCAAC
30	20200812-C-2	C	Figure 1 / Paired / 30	AAAAAACAAACAAACAACCACAAAAAAACCACACAAAACACAAAACAAAAAAA	AACAACACCCCACAACAACCCCCCCACAAACCACCAACCACCCCACA
31	20200812-D-2	D	Figure 1 / Paired / 31	AAACAAAAACACAACACCAAACACACACAAAAAACAAAAACAAAACAAAACCACAAACACCAAACAAAAAAAAA	ACCAACCCCCCCAAAAACCCAACAC
32	20200812-G-1	G	Figure 1 / Paired / 32	ACAACACAAAAACAACCACAAAACAACAAAAAAAACAAACAAACACAAAAAA	AAAACCCCAACACCCAACAACACCCACCCCCAACACAAAACCCAACCACCAAACCCACCCAACC
33	20200910-B-1	B	Figure 1 / Paired / 33	AAAAACAACAACAAACAAAAAC	CCCAAACCCCAAACACCCCACCAAACCACCACCAAAACAAACCACAACACAA
34	20200910-B-2	B	Figure 1 / Paired / 34	AAACAAAA	CCCAACACCAACACAACC
35	20200910-F-1	F	Figure 1 / Paired / 35	AAAAACACACCAAAAAAACAAAAACAA	ACCACCCCCAACCAAAAC
36	20200910-H-1	H	Figure 1 / Paired / 36	AAAAACAACAAAAC	CCCAC
37	20200929-B-1	B	Figure 1 / Paired / 37	AAAAAACAAAAAAACAACACACAAAAAAAACAAAAA	AACACACCACCAACAACCACCACACCCAACCACCAC
38	20200929-B-2	B	Figure 1 / Paired / 38	AACACAAAAAAACCCACACAAAAAAAACCAAAAAAAAACCCAACAACAAAA	CCCCAACCAACAACCCAAAAACAACACCCCACCCAACCAACACCACCAACAAAC
39	20200929-C-1	C	Figure 1 / Paired / 39	AAAAAACACAAACCAAAAAAAACAACAAACAAAAAAAAAACACAAACAA	AACACACAACACCCCAAACC
40	20200929-D-1	D	Figure 1 / Paired / 40	AACAAAACAACACACAACAAAAAAAAAACAAAAACACAAAAAACAACCAAAAAACCACAAAAAAAAAAAA	ACAACCACACCCCACACCCAACCACACCAACCACCAACCCAACCCACACCCCCCCAAAAAAAACAACCACCCCCCCACC
41	20200929-D-2	D	Figure 1 / Paired / 41	CAAAAAAAACAACCAAAA	CCCCCA
42	20200929-E-1	E	Figure 1 / Paired / 42	AAAACAAAACAACAAACAAACAAACACAAACACCAAAACAAAAACCACAAAAACCCAA	ACACCCACCACCAACCACACCA
43	20200929-F-1	F	Figure 1 / Paired / 43	AAAAACCAAAAAACCAAAACACAAACA	AACCACACCCACAAAAACCACACC
44	20200929-G-1	G	Figure 1 / Paired / 44	AAAACCAACAAAAAAACACAAAAACACCAAAACAACAAAAAACAA	CACCCAACCACCCCCACAC
45	20200929-H-1	H	Figure 1 / Paired / 45	AAAACACACACCCAAAAACAACAAAAAAACAACAAAACAAAAAACACCAAAAAAAAACAAAAACCAAACAAAAA	AAACCAAAAACAAAAAAAACCCCACCACCACACCAAACACAACAAACCCACCAAAACCAAAAAACACACCCAACC
46	20200930-B-1	B	Figure 1 / Paired / 46	AACACAAAAAACAAAACACCCACAAACAAACAAAAACAAACAACAAAAACCACCACAAAAAACAAAAA	CAACAAAAACAACACCCAAACAAAAACCAA
47	20200930-C-1	C	Figure 1 / Paired / 47	AAAACAACAAAAAAACACAAAACACAAAACCAAACCAAAACAAAAAACAAAACAAAACACAAAAAACAAAAAACACAACAA	ACACCC
48	20200930-D-1	D	Figure 1 / Paired / 48	ACAAACAAAAAAAAAAAAACCAAACCAAAAACCAAAAACAAACACCAAAAACAACCAACACCACAAAC	CACCAACCAACACAAACACCCCCCCAACCACAAAACCAAAACCCACCACAAAACCCCACACAAACACCACCACAC
49	20200930-E-1	E	Figure 1 / Paired / 49	AAAACAACAAAAAACAAAAAACAAAAACAACAAAAAAACAAAAAACAAAACAAAACAACAACAACCAACAAAAACACAA	AACAACCACACCACCCAACCC
50	20200930-F-1	F	Figure 1 / Paired / 50	ACCAAAAAAAACCAAACAAAAAAACA	ACACAACACCAACACCACCACACAA
51	20200930-G-1	G	Figure 1 / Paired / 51	AAAAAAACACACCAAAAAAACAAACACCCCAACAAAAAACAAAACAAAACACAAAACCAAAAAAAAACAACCAAACACAA	ACACCACACAACCCCCAACCCAACCCCACAACAACCCACAAACACAAACCCAACCAA
52	20200930-H-1	H	Figure 1 / Paired / 52	ACAAACAAAAAAAACCAAAAAAAAAAACACCAAAAAAAACAAACCAACAAAACAAAAAACAAAACACCACAAAACCACAAAAAA	AACACACCCCCCAACCAACCACAAACAACAAAA
53	20200930-H-2	H	Figure 1 / Paired / 53	CAAACAAAAAAAAACAAACAAACCACAAAACAAAACCACACAAAAAACAAACAAAACCACAAAAAACACACAACAACAACAAAAAACCAAAAAAA	CACCCAACACCAACCACACACCAACCAACCAACAACACAAAACACAACACACACCACCCACACAAAC
54	20201001-B-1	B	Figure 1 / Paired / 54	AAAAAAAACCAAAAAAAAACACCAACCAAAACAAAAAACACAAAAACAAACACAAAACCAAAAACAAAAAAACAAAACACCAAAAAACACACCAAAAA	AACAACCCACCAACACAAACCACCCACCAACAACCCCCCAACACCCCACCACACACCACCCAAACACA
55	20201001-C-1	C	Figure 1 / Paired / 55	AAAAACACAAAAACAAAAAAAAAACCAA	CCCAAACA
56	20201001-C-2	C	Figure 1 / Paired / 56	CAAAAACAAAAACCAAACACACAAA	CACCACAAACCAA
57	20201001-D-1	D	Figure 1 / Paired / 57	AAAAACAACAAAAAAACCAAACAAAAACAACAAAACACAAAAAACACACAACCAAAAAAAACAAAA	CCCCAACACACCCCAACAACCAACACAAACACCAACAACACC
58	20201001-D-2	D	Figure 1 / Paired / 58	AAACACAAAAACAAA	CCCAAACAACCCCAAA
59	20201001-E-1	E	Figure 1 / Paired / 59	CAAAAAAACCAACAAAACAAAA	AAACCCCACC
60	20201001-F-1	F	Figure 1 / Paired / 60	AAAACACAAAAAAACAAACAAAAACACCAA	ACACCAAAACCCAACAAAACCAAACCAACCCCCACCAAAA
61	20201001-G-1	G	Figure 1 / Paired / 61	AACAAAACACAACAACCAAACAAAAAAA	ACACCACCAA
62	20201001-G-2	G	Figure 1 / Paired / 62	AAAAACAAAACAACAAAAAACACAAAACAAAAACAAAAACACCAAAAACCCAAAAACCAAAAAACCAAAACAAAACAAAAC	AAAACCCAACCCCAAACCAAC
63	20201001-H-1	H	Figure 1 / Paired / 63	ACAACACACAAAAAAAAACAAAAAAACCAAAAACACCAAAAAACCAAAAACCAAACAAAACAAAAAA	ACAACAACCACCCACCCACCCAAACCACCAACAAACACACACACAAAAAACAAACAAAACAAACAAACAACACCCACACAA
64	20201001-H-2	H	Figure 1 / Paired / 64	CAAAAAAAAAACAAAAAAAACCACACACAAAAAACAAAAAAAAAAACAAACACAACAAAAAAACACCAACAAACCAACCACAA	CAAAACCCCCACAACAACCCCAACAAACCACACAACCACACAACCAAACA
