# Supplementary material for: Switch-like and persistent memory formation in individual Drosophila larvae
Source: eLife. 2021 Oct 12;10:e70317. doi: 10.7554/eLife.70317 (PMC8510578; doi:10.7554/eLife.70317)
Supplement: Figure 3—source data 1. [file elife-70317-fig3-data1.xlsx]

## Sheet: 2 Cycles, Training
	Figure 3
	Male parent: SS00864-Gal4; Female Parent: UAS-CsChrimson
	Training protocol: Paired training; repeated 2x
Number	Animal ID	Apparatus	File Path	Naive decision sequence	Post train decision sequence
1	20200730-B-1	B	Figure 2 / 2 cycles / 1	AAAAACAAAAAAAAAAAAAACAACAAAACCAACACAAAAACCAAAACACAAACCCACAAAAAACACCACACACAAAAACCAAACCACAAAAAA	AAACACAAAACCAAAACCACAAACAAAAAAACCACAACAAAAAACACACAACACAACACACCACACCCAAAAACCAC
2	20200730-D-1	D	Figure 2 / 2 cycles / 2	AAAAAAACACCAAAAAACAACACAAAAAACAACCAAACAAAAAACAACCAACC	AACCAA
3	20200730-F-1	F	Figure 2 / 2 cycles / 3	AAACAACAAACACAAAAACAAACCACAACAAA	CAACCCCCCCCCAAACCAAAAACACCCCAACCACCCAAACCCACAAAACAAAAAAACCCCCAACACCACAACCAAAACAAACAAAAAACAACCCACCCCCACCCAA
4	20200730-G-1	G	Figure 2 / 2 cycles / 4	AAACAAAAACACAACAACCAAAACCCAAAAAAAACCACACCACAACAAA	AACCAAAACCAACCCACAAAACCACACAAACCACAA
5	20200730-H-1	H	Figure 2 / 2 cycles / 5	AAAAAACA	AAAA
6	20200803-B-1	B	Figure 2 / 2 cycles / 6	CAAAAAACAAAAA	ACCAACCACCCCAACC
7	20200803-B-2	B	Figure 2 / 2 cycles / 7	AAACAACCAAACACAAAAAACACCAAAAAAAACACACACAACAAACC	CCCCCCCAAAACCAACCAAACCCAACAACCC
8	20200803-C-1	C	Figure 2 / 2 cycles / 8	AACAAAAACAACACAAACAAAAAACA	CAAA
9	20200803-D-1	D	Figure 2 / 2 cycles / 9	AAAAAAAACCACAAAAA	ACAAA
10	20200803-D-2	D	Figure 2 / 2 cycles / 10	AACAACAAACAAAAAAAAC	ACCACCCCCACCCCAACA
11	20200803-E-1	E	Figure 2 / 2 cycles / 11	AAAAACAAAAAAC	CAAA
12	20200803-F-1	F	Figure 2 / 2 cycles / 12	ACACAAA	CAACAAAAAACAACAAAACACAAAAAAAACCAAA
13	20200803-G-1	G	Figure 2 / 2 cycles / 13	AAAAAAACAC	ACAA
14	20200807-B-1	B	Figure 2 / 2 cycles / 14	AAAAACAAAACAAAACAACACAAACCAAACACAAAAACAAAAAACAAAAACACAAA	ACAAACACAACCCACACACCCCACCACCAACCCAACACCCCCACCAAAACACAAAACAC
15	20200807-B-2	B	Figure 2 / 2 cycles / 15	AAAAACACAAACACAACCAAAAACCAAAAAACACACAACCAAACACAAAAAAACAAA	CCCCCCCCCCAAAAACAAACACAAACCCCACA
16	20200807-C-2	C	Figure 2 / 2 cycles / 16	AAAACAACACAACAAAAAAACCA	ACAACAAAACACCAAAAA
17	20200807-D-1	D	Figure 2 / 2 cycles / 17	AAAAACCAA	AACAAAAAA
18	20200807-E-1	E	Figure 2 / 2 cycles / 18	AAAAAACAAA	CAACCCAACAACA
19	20200807-G-1	G	Figure 2 / 2 cycles / 19	AAAAAACAAAAAACACAAAACAAACCAAA	CCACACCCCCACCACCCCC
20	20200807-H-1	H	Figure 2 / 2 cycles / 20	AAACAACAAAA	A
21	20200810-B-1	B	Figure 2 / 2 cycles / 21	AACACAAAAAAAACAC	AACAAA
22	20200810-B-2	B	Figure 2 / 2 cycles / 22	AAAAAAAACAAACAACAAAAAACCAAACAAACA	CCAAAACACCCACCAACAACACCAAC
23	20200810-C-1	C	Figure 2 / 2 cycles / 23	ACAAAAAAA	AAACAA
24	20200810-C-2	C	Figure 2 / 2 cycles / 24	AACAAAACACAACCAAAACAAAAAAA	AACA
25	20200810-D-1	D	Figure 2 / 2 cycles / 25	AAAAAAAAACAC	AA
26	20200810-D-2	D	Figure 2 / 2 cycles / 26	CAAAAACAAAAAACAAA	CAACAAA
27	20200810-E-1	E	Figure 2 / 2 cycles / 27	AAAAACACAAAAAAAACACAACACCAAAAACCACAACAAAAAAAAAAAACACAAAACAAAAAA	CCACCCCCCAAACCCCAAAACCACAAAAAACCACCACCCCCCCCCCACCACCACAAAACAACAACACCCACAAAAAAAACACCACCCC
28	20200810-E-2	E	Figure 2 / 2 cycles / 28	CAACAAAAAAAAAAAAAACCACAAAACAAACAACAAACAAACA	CACAACCCACCAAACC
29	20200810-F-2	F	Figure 2 / 2 cycles / 29	AAACAACAACAAAAA	CACAACCACCCAAC
30	20200810-G-1	G	Figure 2 / 2 cycles / 30	AAAACCAAAAA	AACCACCAACCAACCAACACCAACCAAACACACAAACACAAACCCACAACCA
31	20200810-H-1	H	Figure 2 / 2 cycles / 31	AACAAAAAACACAAAAACAAACCAACAAAAACAC	AAAAAAAC
32	20200812-B-2	B	Figure 2 / 2 cycles / 32	AACAAAACAACAAAAAAAACCCAAACACCACAAAAAACCAAACAAACAAAAAAAAA	CACACAACCCCACCCAAAAACAACCCCCAAACACAAACACACCAACAA
33	20200812-C-1	C	Figure 2 / 2 cycles / 33	AAACAAAAAAAAACCAACAAACACAAAAACCAAAAAAACACAAAACAAAACAAAAAACCACAACAAAAAAAAAACAAAAAA	ACCACCCCCAAACCCAACAACACCCACCCACACACACCCCCACCAACCAACAACACAACCCAACCCACCACCAAAAACAAAA
34	20200812-D-1	D	Figure 2 / 2 cycles / 34	CAACAAAAAAAACAAAAACAAAAACAACACAAAAACAAAAAAAAAAACCACCAAAAAACACAACAAAAAAACAACAAAAAAACAAAACCCACCCAAAACAAAAAAA	CACACACAAACAACAAAAACAAAACAAACACACCCAAAACCCACACAAACCAAACAACAAAAAACAACAACAAAAACAACAAAAAAACAACACCAAAACCCCCAAA
35	20200812-E-1	E	Figure 2 / 2 cycles / 35	CAAAACAAAACACAAAC	AAAAACAAAC
36	20200812-F-1	F	Figure 2 / 2 cycles / 36	CAAACAAAAAACACACAAAAACAACACACAAAAAAACAA	CCCAACAC
37	20200813-B-1	B	Figure 2 / 2 cycles / 37	AAAAAACACCACAACAAAAAAA	CCCACCAACACACCCAAAACCAAACCACAACCCACACACC
38	20200813-E-1	E	Figure 2 / 2 cycles / 38	AAACAAAAACAACCAAAAAAAACA	CAAAAAA
39	20200910-C-1	C	Figure 2 / 2 cycles / 39	AAACACAA	AAACACAAACAACAAACAAAACACCAC
40	20200910-C-2	C	Figure 2 / 2 cycles / 40	AACAACAAA	AAA
41	20200910-D-1	D	Figure 2 / 2 cycles / 41	AAACAAACAACAAAACCAAACAAAAAACACCCAAAACA	CCACA
42	20200910-D-2	D	Figure 2 / 2 cycles / 42	AAACAACAACAACAAAAAAACCAACACAAAAACCAAACAACAACAAAAAA	ACCCAAC
43	20200910-E-1	E	Figure 2 / 2 cycles / 43	AACAAACAACAACAA	AAAAA
44	20200910-E-2	E	Figure 2 / 2 cycles / 44	ACAAA	CAACC
45	20200911-F-1	F	Figure 2 / 2 cycles / 45	AAACAAACA	AACCAAAA
46	20201005-B-1	B	Figure 2 / 2 cycles / 46	AAACAAAAAAAAACAAACACAAAAACAAAAAAAACAAAACCAAAAA	CCCACACACAAACACCCACACACAACCAAACCCACCCACCACACAAACAAAACACCCCCACAAAA
47	20201005-B-2	B	Figure 2 / 2 cycles / 47	AAAAAAACAAAACCAAAACACAAAAACAAACCAACAAACAAAAAAACACAAAAACAAAACAA	CCCCAACACCACCACAC
48	20201005-C-1	C	Figure 2 / 2 cycles / 48	AAAACAAAAAACAAACA	AAAACA
49	20201005-C-2	C	Figure 2 / 2 cycles / 49	CAAAAAACAACACACAAAAAACAACCAAAC	CCCACACCCCACCAACACC
50	20201005-D-1	D	Figure 2 / 2 cycles / 50	AAAACAAAACAAAA	CACAACAAACCC
51	20201005-D-2	D	Figure 2 / 2 cycles / 51	AAAAAACACAAACACAAAAAAA	CACAAACAACCCAACACACCCAACAACACCCCCCCACACC
52	20201005-E-1	E	Figure 2 / 2 cycles / 52	AAAACAAACAAAAAAACACAAAAA	AAAAAACC
53	20201005-E-2	E	Figure 2 / 2 cycles / 53	AAAAAAAACAACAAAACAAACAAAAACAAACAAAAA	AAAAACAAACACCA
54	20201005-F-1	F	Figure 2 / 2 cycles / 54	AAAAACAAAAAACACAAAAAAACAAACAAAA	ACAACAAAAAACAAAACAAACCAAACAACAAAAAACAACACAAACAAAAAACAACA
55	20201005-F-2	F	Figure 2 / 2 cycles / 55	AAAAAAACAAAAACACAACAACACAAAAAAAAAAC	ACACAAAA
56	20201005-G-1	G	Figure 2 / 2 cycles / 56	AAAAAACACAAAAAAAAACACCAA	AACAA
57	20201005-G-2	G	Figure 2 / 2 cycles / 57	AAAAACAAAACAACACCAAACAAAACACAAAAAACAACAAAACAAAAAAAAACACACCAAAAA	CAACCAACCCACCACACACAACACCACCCAACCCCCCCA
58	20201005-H-1	H	Figure 2 / 2 cycles / 58	AAAAAAACCAACCAAAACCCACAACA	AACACAACACCACAAAAACCCCCCCAACA
59	20201005-H-2	H	Figure 2 / 2 cycles / 59	CAAAAAACAAACACAAACCAAAAAAAAAAAAAAACAAAAAAAAACACAAAAACCAACACACAAAAAAA	ACAAACACAACACAACCCACACACCCACAACCACACCACCCCCCCCCCAACCCAAACACACACC
60	20201006-B-1	B	Figure 2 / 2 cycles / 60	CAAAAACCAAAAAAAAACCACCAAAAAACAAACAACCCAAACAACCAAAACAACCAAAACAACAAAAAAAACAAAA	ACCACCAAACAAACCCACCCACCCCCACACACCAAACCCCCAACACCCCACAACACCCAAAC
61	20201006-B-2	B	Figure 2 / 2 cycles / 61	AAACAAAACAACAACACAAAAAAACAAAAACAAAAACAAAACACAAACACAACACCAAAACACAAAACCAAAAACACCACAACAAAAACAAAAAAACCCACAAAAACAACAAA	CACACACAACCACAAACCCCCCAAACACCCACAAACAACACAACCCCCAACACC
62	20201006-C-1	C	Figure 2 / 2 cycles / 62	CAAAAAAACACAAACAACAACAAACACAAAA	AAAAAACACAAACAAACAC
63	20201006-C-2	C	Figure 2 / 2 cycles / 63	CAAAAAACAAACAAACCAAACAAAAAAAACAACAAAAACAAAAAACAAAAACAACCAAAACAACCAAAACACCAACAAACAACAAACAAAAAACAAAA	CAAACAAACAAACAACAA
64	20201006-D-1	D	Figure 2 / 2 cycles / 64	AAAAAAAAAACACAAAA	AACCACCACCCCCACACAACACA
65	20201006-D-2	D	Figure 2 / 2 cycles / 65	ACAAAAAACAAAACCAAAAAAACCAAAAAAACACCAAAAAAACCAACCAAAACAAAAAACCAAAACCCAAACCACAAAAACAAAACAAAACCCAACAAAAAAAAAAACCACAAAACAACA	CCCCCAAACCAAACCACCCAACCACCA
66	20201006-E-1	E	Figure 2 / 2 cycles / 66	CACAACCAAAAACAAAACAAAAAACAAAAAAAACAAAACAACCCACCACAACAACAAAAACAAAAAACAAACAACAAACCACCCAACAACAACCACAACCAAAAAAAAACAACAAAAA	ACACCACCAAAAAACAAAACCAACACCCAAAA
67	20201006-E-2	E	Figure 2 / 2 cycles / 67	ACAAAACAAAACAACACAACAAAAAAACACCAAAACACAACAAAAACCAAA	AAAACA
68	20201006-F-1	F	Figure 2 / 2 cycles / 68	CAAAAAACA	ACAAAA
69	20201006-G-1	G	Figure 2 / 2 cycles / 69	CACAAACACAACACAACAAAA	CACAACCACCCACACAACACAAAACACCAACCCAAACACAACAACCCCAACCCCCACCAA
70	20201006-G-2	G	Figure 2 / 2 cycles / 70	AAAACACAAAAAAAACAAAAACAAACCAACAAAAAACCAACAAAACAAACAAACCAACAAAACCAAAACAAAACAACACACAAACAAAACCCAAACCAA	ACACAACACCCAACACCCAACAACACAACC
71	20201006-H-1	H	Figure 2 / 2 cycles / 71	AAACAACAACAC	CACACAAACAAA
72	20201007-B-1	B	Figure 2 / 2 cycles / 72	AACAAAACAAAAAAAACAACAAACAACAACAAAACAAACAACAAACA	CACAAACACAAACAAACAAACACACCAAACAACACAAACCAAAAAAACACACAACACACCACAAA
73	20201007-B-2	B	Figure 2 / 2 cycles / 73	AACAAACACAAACACAAAAAAACAAAAAACCACAACACAACAACAAAACAACAAAAAAAA	ACAAACACCAAAAAAACAAAACCCAAAAACCACAAACAC
74	20201007-C-1	C	Figure 2 / 2 cycles / 74	CACAAACAAACAAACAAACCAAAAAAACAACAAAACAAA	CAACACCACCACCAAAAACAACACCCCAAACACCCAAAAAAAAACACAACACCACAACACCCAACACCACAC
75	20201007-C-2	C	Figure 2 / 2 cycles / 75	AAAACAAAAACAAAAACCAACAAAAAC	CACCCCCAACCACCAACACAACCAACCCCAACCCCCCA
76	20201007-E-1	E	Figure 2 / 2 cycles / 76	AAAAACCAAACAAACAACAACAA	CACACCCCCAAACACACCCAAACAACAAACCACAC
77	20201007-E-2	E	Figure 2 / 2 cycles / 77	CAACAAAAAAAACACAAAACAAAAACACAAACAAAAACAAAAAAAC	CCACAACACCAACAACAC
78	20201007-F-1	F	Figure 2 / 2 cycles / 78	AAAACCCAAACAACAAACAAAAACAAAAACACACACAAAACCAAAAACACAAAAAAAAAACAAAAACAAAAACA	ACACCAACCAAACCCACACCCAAC
79	20201007-F-2	F	Figure 2 / 2 cycles / 79	AACAAACA	AAAACAACA
80	20201007-G-1	G	Figure 2 / 2 cycles / 80	CCAAACAAAAAAACACAAAAAAAAAAAAACACCAAACCAAACAAACAAAACCAACAACAAACAAAAAAAAACACACA	AACACACCACACCAACCACCA
81	20201007-G-2	G	Figure 2 / 2 cycles / 81	AAAAACACCAAACAACACACCAACAAAAAAAACAACCAAAAAACACAAAACCCA	CCCCCCAAACCCAACCCCCCACCCCCAAAAAACAAAAACA
82	20201007-H-1	H	Figure 2 / 2 cycles / 82	CAAAAAACAAAAACCAAAAAAA	CACAAAAAA
83	20201008-B-1	B	Figure 2 / 2 cycles / 83	AAAAAACACAAACAACCAAAACCAAACAAAAAAAACACAACACAAAACAACAAAAAACAAACAAAAACAACACAACCAAAAACAAACAAAACAAACCAAAAAAACAAAAAACACACAAACACAACACCACAACAAAA	ACAAAACCAACCACACCAAAACAAACAACAAACAACAACAAAAAAAACAAACAACAAAAAAAAAACACCAAAACACACAACACAACAAACA
84	20201008-E-1	E	Figure 2 / 2 cycles / 84	AAACAAAC	CAAAACAACAAACACAAAACAAACAAAA
85	20201008-F-1	F	Figure 2 / 2 cycles / 85	AAAAACAACAACAAACACAAAAAACACAAAAAACCAAAAAAAA	AAACCAAAAAC
86	20201008-G-1	G	Figure 2 / 2 cycles / 86	AACAAAAAAAAAAACCAACAACACAAAACACCAAACACAAACCAAAAAAAAAC	CAACCACAACCCACCCCCCACCA
87	20201008-H-1	H	Figure 2 / 2 cycles / 87	AAAAAACCAACAAAACAAAACAAAAACACACAAAACAACAAACACAAACAAACACACAACACAAAAAAAC	ACCACAACCACACACCCAACCACCACCACAACC

## Sheet: 2 Cycles, Habituation + Trainin
	Figure 3
	Male parent: SS00864-Gal4; Female Parent: UAS-CsChrimson
	Training protocol: 18 habituation cycles, followed by 2 cycles of paired training
Number	Animal ID	Apparatus	File Path	Naive decision sequence	Post train decision sequence
1	20201103-B-1-H	B	Figure 3 / 2 Cycles, Habituation + Training / 1	AAAACAAAC	ACCAAAAAAAAC
2	20201103-C-1-H	C	Figure 3 / 2 Cycles, Habituation + Training / 2	AAAAAAACCAACAACAAAAAAACCAAAAACAAAACCAAACACCAAAAAAACCAACAAAAAAAACCACAC	CACACCCACACCAACAACCACAAAAAAAACCCCAAACCCACCACACCC
3	20201103-D-1-H	D	Figure 3 / 2 Cycles, Habituation + Training / 3	CAAAAAACCACAAAAAAACAAAA	CAAACAAAACCCCCCCAAC
4	20201103-E-1-H	E	Figure 3 / 2 Cycles, Habituation + Training / 4	CAACAAAAAAAAACAACAACAAAAACCCAAAACCCAAAACCACACAAAAAAAAA	CACAAAACACAACAACCAAACCCCACCCCCCCCAAACACCCAACCCAACACAAACCACC
5	20201103-F-1-H	F	Figure 3 / 2 Cycles, Habituation + Training / 5	ACACAACAAACAA	AAAACACAACAAACAAA
6	20201103-G-1-H	G	Figure 3 / 2 Cycles, Habituation + Training / 6	ACAAA	AACAAACA
7	20201103-H-1-H	H	Figure 3 / 2 Cycles, Habituation + Training / 7	AAAACAAACACAAAAAACAAACAAAACCAAAAACAACACAACAAAAAACCACAAACAAAAA	CACACACCCCCCCCCCCCACACAAACCACCACCAAAAACCCACAAAAACC
8	20201104-B-1-H	B	Figure 3 / 2 Cycles, Habituation + Training / 8	AAACAAAAAACACCCAAAAACAAAAAACAACCAAAAAACAAAAACACAAAACAACAAAAAAAACCACAACCAAA	AAAAAAAACACACAAAACC
9	20201104-C-1-H	C	Figure 3 / 2 Cycles, Habituation + Training / 9	ACAAAAAAAACAAACACCAAAAAACACAAAACACAAACAACACAAAACAACAA	CAAAAACC
10	20201104-D-1-H	D	Figure 3 / 2 Cycles, Habituation + Training / 10	AAACACAAAAAAA	AACCCCACACAAAA
11	20201104-E-1-H	E	Figure 3 / 2 Cycles, Habituation + Training / 11	AACAAAAAAAAAACCCCAAAAAAAAACAACCACAAAAACCCAACAAACACAAACAAAAAAACACCAAAC	CACCCCAA
12	20201104-F-1-H	F	Figure 3 / 2 Cycles, Habituation + Training / 12	AAACACAAAACAAAAACAAAAAAACAACAAAACCAAACAAAACACAAACAAACAAACAAAAACA	CCCACACCAAAAAACCCCCCACAAAACAACCAACACACCCCAAAAAAAAACACAC
13	20201104-G-1-H	G	Figure 3 / 2 Cycles, Habituation + Training / 13	CAAAAAAACCAA	AAACAACA
14	20201104-H-1-H	H	Figure 3 / 2 Cycles, Habituation + Training / 14	AAACCAAAAAA	ACACAACAAAAACACACCACAACAAACCACCAAAACCCCAACCAACCACCCCC
15	20201105-B-1-H	B	Figure 3 / 2 Cycles, Habituation + Training / 15	ACAAAAAAAACCAAACACAAACAAAACCAAAAACACAACAAACAAAACAACACAAAAACCAACCACAAAACAACACAAAAAAAAC	AACCAAAACAAAAAAAAAACAACC
16	20201105-B-2-H	B	Figure 3 / 2 Cycles, Habituation + Training / 16	CAAAAAACAACCAACAAAACACAAAAAAAACACAACAAAA	CCCAAACCACACAAACCCCCCCC
17	20201105-C-1-H	C	Figure 3 / 2 Cycles, Habituation + Training / 17	AAACAAAAACCAAAAACCAAAAAACACAAA	AAAAACACCAA
18	20201105-C-2-H	C	Figure 3 / 2 Cycles, Habituation + Training / 18	AACAAAAAACAAAAAACACACCAAAAAAACCAACACACAAAAAAAAACCACAACCACAACCAAAACAAAAAAAAACAAAAACAAACCCAAAAA	CAAAACCACCCCCAACCAACAACCAACACCACAACAAAACAAAAACAACAAACAACAAAACCAC
19	20201105-D-1-H	D	Figure 3 / 2 Cycles, Habituation + Training / 19	AAAACCCAAACCAAAAAAAAACCAACACAAAACACACAACAAAACACACAAACAAAACAAAACACCAAAAAACAAACAACAACAAAAACACAAACCAAAAAAAAA	ACCAAAAAAAAACCACAAAAAAAAACACAAAAAAAACACACCAAAAACAAAAAAACACACAAAACACAACAAAACAAAA
20	20201105-E-1-H	E	Figure 3 / 2 Cycles, Habituation + Training / 20	AAACAACAAAAACAAAACAAAAACAAAACACAAAACCA	CACCA
21	20201105-F-1-H	F	Figure 3 / 2 Cycles, Habituation + Training / 21	AAAAAAACACACAAAAACAACAAACAACAACAAA	CAAAACCAAACAAAAAAAAAA
22	20201105-G-1-H	G	Figure 3 / 2 Cycles, Habituation + Training / 22	AAAACAAAACCCAAAAAACACAAAAAAACAC	CAAACCCCACAAAACCCACA
23	20201105-H-1-H	H	Figure 3 / 2 Cycles, Habituation + Training / 23	AAAAAAAACACCAAAAACCAAAAAAACCAAAACAAACAAACAAACAAAAAAACAACAAAAAAACACACACAAAAAA	AACAAAAAACAAACAACCACAACCCCCAAAAAAACCCACCAAAAACCCCCCACCCCACAAACCCACAAACCACCCCACCAACC
24	20201106-B-1-H	B	Figure 3 / 2 Cycles, Habituation + Training / 24	AAAAAACCACAACAACAAACCAAAACAAAACAAACAAAAAACCAAAAACAACAAACAAACAAACAAAA	AAACACCAAAACCCAAACCAACAAAACCACAAACAAA
25	20201106-C-1-H	C	Figure 3 / 2 Cycles, Habituation + Training / 25	CCAAAAAAAACAAACAACACAAAAACAAAACCAAAAAAAAACCAAAACCAAAACCCAAAAAAACAAAACAAAAAACAAAAACAAACAACACACAAAAAA	CAAAAAACACAAAACCAAAAACACCACAAAAAAAACCCCAAAAAAAAAACAACACACCAACACACAAC
26	20201106-D-1-H	D	Figure 3 / 2 Cycles, Habituation + Training / 26	AAAAAAAAACAAACACACAAAA	CAAACAAACAACA
27	20201106-E-1-H	E	Figure 3 / 2 Cycles, Habituation + Training / 27	ACACAAACCAAAAAACAAAACAACAACAAAAAAAACACCACAAAAACAAAAAAAACAC	CAACACCCCACCAACCCACCACAAAACAACCAAAACCCACCCAC
28	20201106-F-1-H	F	Figure 3 / 2 Cycles, Habituation + Training / 28	AAAAACAAAAACAAACCAAACAAACAAACAA	AAAACAC
29	20201106-G-1-H	G	Figure 3 / 2 Cycles, Habituation + Training / 29	AACAAAAAAACACACAAAACCAAAAAAACAAAACAACACCAAAAACCAAAAAACAACCAAAACAACAAAAAACCAAAA	CCCAAACCACACACCAACCCACCCACCAAACACCCAACACCCAACCACAA
30	20201106-H-1-H	H	Figure 3 / 2 Cycles, Habituation + Training / 30	AAAACACAAAAACACAAACCAAAAAACACACAACAAAAAAAACCAAAAAAACAAAACAAAAAAAACACACACCAACACACAAAACAAAAACACA	ACACCAAACCACCAAACCCCACAAAACCACCACACCAACCAAACCACAC

## Sheet: 2 Cycles, Training + Extinction
	Figure 3
	Male parent: SS00864-Gal4; Female Parent: UAS-CsChrimson
	Training protocol: 2 cycles of paired training, followed by 18 extinction cycles
Number	Animal ID	Apparatus	File Path	Naive decision sequence	Post train decision sequence
1	20201103-B-1-E	B	Figure 3 / 2 Cycles, Training + Extinction / 1	ACAAAACAAAAAAACAAACACACCAAAAAACAAACAAACCACAACAAACAAACAACAAACACACAACAAAAAAAACCAACCAACAAAA	AAAACACCAACAAAAAAACCAACAACAAACCAACAAAAACAACACAACACACAAAAAAAACAAAACACC
2	20201103-C-1-E	C	Figure 3 / 2 Cycles, Training + Extinction / 2	AACA	AAAAAAACAACCAACAAC
3	20201103-D-1-E	D	Figure 3 / 2 Cycles, Training + Extinction / 3	CAAACAAAAC	AACCAAAAAAACACAAAACCACCAAAAAACAAACACAAAAAAAACAC
4	20201103-E-1-E	E	Figure 3 / 2 Cycles, Training + Extinction / 4	AAACAC	ACAAAAAAACCACCACAACACAAAACAAAAACAAACCCCAAACCCAACAAAAAACACA
5	20201103-F-1-E	F	Figure 3 / 2 Cycles, Training + Extinction / 5	AACACCAAAAACAA	AACC
6	20201103-G-1-E	G	Figure 3 / 2 Cycles, Training + Extinction / 6	AAAC	AACCA
7	20201103-H-1-E	H	Figure 3 / 2 Cycles, Training + Extinction / 7	AAAAACAAAACAAAACAACAAACAAAACAAAAAAAACAAACACCAAAACAAACCAAAAAAAAACAACCACCACACCAACACAAAAAACACAAAA	CAAAAACACCCAAAACAAACCCCCACCCACCCACACCCCAACCCCCCACAACACCAACAAAAAAACAAAACAAACACAAACACAACAAACACCCCAACACCAAAA
8	20201103-H-2-E	H	Figure 3 / 2 Cycles, Training + Extinction / 8	AAACAAAACACAAAAACAACAAAAACCCAAAAACAAAACAACACACACAAAAACAAACAAAAAAACCACAAACAACAACAAAAAC	ACACAAAAACAAAAACCAAAACCAAACAAAACAACAAACCAACCAACAAAAAACCAACAACCCACA
9	20201104-B-1-E	B	Figure 3 / 2 Cycles, Training + Extinction / 9	AACACAAACAA	CCAAACCAAAAAACCAAAACCCAAACAACAACAAACAACACAA
10	20201104-C-1-E	C	Figure 3 / 2 Cycles, Training + Extinction / 10	ACAAAAAACC	AACCAACACACAAAACAACAACCCAAAACCCACACACCAAACCCAAAAACAAACAAAACAACCCAAACCA
11	20201104-D-1-E	D	Figure 3 / 2 Cycles, Training + Extinction / 11	CAAACCAAACCAAAAACAAAAAACAACACACAAAAAAAACCACAACCAAACAAAAAAACAAAAACACAAC	AAAACCAAAAACACAA
12	20201104-E-1-E	E	Figure 3 / 2 Cycles, Training + Extinction / 12	AAACCAAAACAC	AACCAAACAAACCAACA
13	20201104-F-1-E	F	Figure 3 / 2 Cycles, Training + Extinction / 13	AAACCCAAAAAA	AAACACAACAAAAAACCAAAA
14	20201104-G-1-E	G	Figure 3 / 2 Cycles, Training + Extinction / 14	AAAAAAACACAAAAACACAACCAAACAAA	ACAAA
15	20201104-H-1-E	H	Figure 3 / 2 Cycles, Training + Extinction / 15	ACCAAACACAAAAACAAAACACAAAAAAAACCAAAAAACCAACACAAAAAACCAAACCCAAAAAAAAAAAAACAACAC	ACAAAAAAAAACACAAACAACAAAACCAAAAACAAAAAACAAACAAAAAAAAAAAAACACAACCACAAAAAAAAAACCAACAAAAACAAAAAC
16	20201105-B-1-E	B	Figure 3 / 2 Cycles, Training + Extinction / 16	AAACAAAACAAAAAAAACCAAACAAAAAAACCACACAAACAAAACACAAAAACAACACCAACAAAAAAAAACACCAA	ACAAAAACAAACAACAAACACAAAACAAACCC
17	20201105-C-1-E	C	Figure 3 / 2 Cycles, Training + Extinction / 17	AAAAACAAAAACAAAACCAAAAAAAACAAAAACACAAAAACCAAAAACACAAAAAAACAACAA	AACAAAAAAACAAACACCAAAAAAAACACCCACACCAAACAAAAA
18	20201105-D-1-E	D	Figure 3 / 2 Cycles, Training + Extinction / 18	AAAACAAAAAAAACAACACCAAA	AAAACAACAAA
19	20201105-D-2-E	D	Figure 3 / 2 Cycles, Training + Extinction / 19	ACCAAAAACAA	CCCAAAACCAAAAAACCCCAACACCAC
20	20201105-E-1-E	E	Figure 3 / 2 Cycles, Training + Extinction / 20	CAAACCACCAAAAACCACAAAAAACAAAAAAAAAACCAAAAAAAACAAAAAAAACAACAAACAAAAAAAAACAAAACCACCAAAAACAAAAACCAAACACCAACCCCAAAACAAACCAAAACA	CCAAAAAAACAACAAAAAAAAAACACCAAAAAAACAAAACCA
21	20201105-F-1-E	F	Figure 3 / 2 Cycles, Training + Extinction / 21	AACACAAAAACAAACACAAAAAACAACCCAAAAAAACAAACAA	AAACAAAACCAAAAAAAACCCCACA
22	20201105-G-1-E	G	Figure 3 / 2 Cycles, Training + Extinction / 22	AAAACACAAAAAAACACCAAAAAAACCAAAAC	AAACAA
23	20201105-H-1-E	H	Figure 3 / 2 Cycles, Training + Extinction / 23	ACAAACAAAAAAAACCACAAACAAAAAAAAACAAAAAAAAACACACACACAAAAAAACCACAAAAAAACACCACAACAAACAA	AAACCAACCCAAACAAAAACCAAACCAAACCCAAAAACCCCAAACACAAAACCCAAAA
24	20201105-H-2-E	H	Figure 3 / 2 Cycles, Training + Extinction / 24	CAAAAAAAACAAAACAAACCAAAAACAAA	AACCAAAACAACAACCACCCACAACCAACAAAACCCAACAAACCAAAACAAAACAAAAACAAAAC
25	20201106-C-1-E	C	Figure 3 / 2 Cycles, Training + Extinction / 25	ACCAACAAA	CAAAACAAACA
26	20201106-D-1-E	D	Figure 3 / 2 Cycles, Training + Extinction / 26	CACAAAAAAACAACAAACAAAAACAACAAACAAAAAAACACAAAAACAACAACCAAAAACAAAAA	AAACACAAAAAAAAACAC
27	20201106-E-1-E	E	Figure 3 / 2 Cycles, Training + Extinction / 27	CAAAAACAACAAAACAAAAAAACACACAAAAACCAAAAA	CAAAAAACA
28	20201106-F-1-E	F	Figure 3 / 2 Cycles, Training + Extinction / 28	AACCAAACCAACAAAAAAAAAAACACAACAAACACACAACAAACCCACAAAAAACCCAAAAACAAAAAAACACCCCAAAAAAAACACAAAAAAC	AAACCCAAAACAAAAACCCAAAAAAACACACCCAAAAACAAACCAAACA
29	20201106-G-1-E	G	Figure 3 / 2 Cycles, Training + Extinction / 29	AAAAACACAACCAAAAAAC	CAAAAAACACCAAACAAAACCAAAACCACAAAAACACACACAAAACAACACAACAAACAAAACACAAACAACACAAAAACACAAACAAAAACACAAAAAAAAAAAAACAA
30	20201106-H-1-E	H	Figure 3 / 2 Cycles, Training + Extinction / 30	AAACAAAACAAAAACAAACCAAACAAAAAACAAAAAACAACAACA	CCAAAAAACCAAAAAACACAAAA

## Sheet: 3 Cycles, Training
	Figure 3
	Male parent: SS00864-Gal4; Female Parent: UAS-CsChrimson
	Training protocol: Paired training; repeated 3x
Number	Animal ID	Apparatus	File Path	Naive decision sequence	Post train decision sequence
1	20200919-B-1	B	Figure 2 / 3 cycles / 1	ACAAAACAAAAAACAAACAAACAAAACAACAACAAAACCAAAAAAACAA	CAACCCCAACAACAAACCAACACCCCCCCAACACAACACCACACAACCCCCCACAACCAACACCACCAAACAACACAAACCA
2	20200919-C-1	C	Figure 2 / 3 cycles / 2	AAAACACACAAA	AACA
3	20200919-C-2	C	Figure 2 / 3 cycles / 3	AAAAACCAAACAAAAAACAAAACACACAAAAAAAACAAAACAACAAACCACAAAA	ACACAAAAAACACAACACAACAAAAACAACCAA
4	20200919-D-1	D	Figure 2 / 3 cycles / 4	AAACACAACAAAAACAAA	ACCCCAACACAACAACCACAACACACA
5	20200919-E-1	E	Figure 2 / 3 cycles / 5	CAAAAAAACAAAAAACACCAAAACCCACAACCAAAAAAAACAAAACACCACAAACCAA	CAAACCCACCACA
6	20200919-E-2	E	Figure 2 / 3 cycles / 6	AAAAACAACAAAACCAA	AACACCCCCCAACCAAC
7	20200919-F-2	F	Figure 2 / 3 cycles / 7	CAAAAACA	CACCACCCACCCAACACA
8	20200921-B-1	B	Figure 2 / 3 cycles / 8	AAACAAAAAAAAAACAAAAACACACCACAAAAACACAACACAACACACAACACAAACAACCAACAAAACCAACAAAAAAAAACAAA	CAAAAACCCCCAACCACCCACCAAAACACCCAACAAACAAAAAACCCACACACCCACCAACACCCAAACAACCCCACCCCACCCAACCCCCAACACACACCCCAAACCCAAACCAAAAAA
9	20200921-B-2-3	B	Figure 2 / 3 cycles / 9	AACACAAAAAACAAACACACCAAAACAAACA	CACAACACCCCCACCAACCACCCCAAAAAACCACACACCCCAACAAACAAAACACCAAACCCCCAACCCCCACCAAACCACCACCCCCCCCA
10	20200921-C-2	C	Figure 2 / 3 cycles / 10	CACAAAAAACCAAAACAACAAAACACAAAACA	CCCCCAAAACCCACACCCAAACCCCAACACCACCACCCAAAAC
11	20200921-D-1	D	Figure 2 / 3 cycles / 11	CAAAAACAAAAACAAAACACAAAACCACACAAAAACACCCAAACAAAAAAA	CAAACCCAACAAACAACCCCACCAAAAAACAAACCCCAAACAACCAACACCCAAACAACAAA
12	20200921-D-2	D	Figure 2 / 3 cycles / 12	ACAAAAAAAAAACAACCAAACAAACAAACACACAAACCAACACAAAACCA	AAAACCAACCCCACAACCACCAACCACCCACACACCAAACAAAACCACAAACCACCCAAAACCCAACCAC
13	20200921-F-1	F	Figure 2 / 3 cycles / 13	AAACAAAAAA	CACACACCCACCACC
14	20200922-B-1	B	Figure 2 / 3 cycles / 14	ACAACAAAAAAACAAACAAAACCAACAAAACAAA	CAAAACCCACAAACCCAAAAACACCCAACCCCACACCCAACAAACCCCCCACAAAACACAACAAACA
15	20200922-B-2	B	Figure 2 / 3 cycles / 15	AAACACAAAAAACAAAAAACAAAAAAAACAAACCAAAAAAAAACCAACAACAAAAAAACAACACAACCAACAACCCAAAAAACAAACACACACCAAAACAAACAACAAAAAAA	AAACAACAACCCACAAACCACAAACCACAACCCCACCCCAAAAACACAAACACACAAAACAAACCACCCCACCCAACCACCCAAACCCAAACACAAAAAACAACCAAAACAAACCCCCCAA
16	20200922-C-1	C	Figure 2 / 3 cycles / 16	AAACACAAAAACAAACACCAAAA	CCAAAACAAAACCA
17	20200922-D-1	D	Figure 2 / 3 cycles / 17	ACCAAAAAAAAACCCAAAA	AAACACAACACACAA
18	20200922-D-2	D	Figure 2 / 3 cycles / 18	AACAACAAAAACACAAAAAACACACACCAAAAAACAAAACACAAAACACAAAAAACACACCAA	ACCAACCACCCCAAAACCAAC
19	20200922-E-2	E	Figure 2 / 3 cycles / 19	AAAACAAAAAACAAACACACAA	ACAA
20	20200922-G-1	G	Figure 2 / 3 cycles / 20	AACAAAACACACACAAAAAAACA	AACAAAC
21	20200922-G-2	G	Figure 2 / 3 cycles / 21	CCAAAAACAACAAACAAAACACCACAAACAAACCACAACAACACCAAACACCACACCAACCCCAAACAAACAACAAAAAAAAAAAAAACCCAACAAAAAAAAAAAACACCAACAAACAAAAA	CCCAA
22	20200923-B-1	B	Figure 2 / 3 cycles / 22	AAAAAACAAAAAAAAAACACACCAAAAAACCAAAAAAAACAAAAAAAAACCCACCCAAAACCAACACAAAAAA	ACCCACAACCAACAACCCCCAACCAACCCCAAAAAACCCCCCCCACCCACAACCACACCCACCAACCCAACCACACCAACAACCA
23	20200923-C-1	C	Figure 2 / 3 cycles / 23	AACAACAAAAACAAAAAAAACAAAAAAACAACCAAACAAAAAAAAAAAAAACAACACAAAAAAACAAAAACAAAAAAAAAAA	ACCAACAACCAAAAACAAAACCAACCCAAACCCAACCCCACACACCAAACCAAAACCACAACACCCCAACCCAAACCCCAACACCACACCCCACACAAAACACACAAACAAAAAAAACCCAACCAACC
24	20200923-D-1	D	Figure 2 / 3 cycles / 24	AAAAAACAAAACACAAAAAAAAAAAACAACACAACAAAAAAACA	AAACCAACCACACACACAACCCAAACCACCAACCCCAACAACAACCACCCCCACCACAACACAAACAAACCCCACCC
25	20200923-D-2	D	Figure 2 / 3 cycles / 25	CAAAAAAAAACAACAAAA	CCACCCACCCCAACAACCCACCCCCCCCCAACCCACACACAACCCCCACAAAAACAAAAAAAA
26	20200923-E-1	E	Figure 2 / 3 cycles / 26	AACAACAAACAAAAA	ACAAAAAAC
27	20200923-F-1	F	Figure 2 / 3 cycles / 27	AAAACAAAACAAAAACAAAAAAAA	CCACCAACAACCAAAACCCCCACCCACCCCCCAAAAAAACACACCCCAACA
28	20200923-G-1	G	Figure 2 / 3 cycles / 28	AACACAAAAAAAAAAAAAAAAACCCCAAACAAAAAAAAAAAACACA	ACCAAACACCCCACCAAACCCCCCAACCCAAAAAAACCCACCAACCCACCAACCCCACAACAAAAA
29	20200923-G-2	G	Figure 2 / 3 cycles / 29	ACACAAACCAAAAA	CCCACAACACCAACCCCC
30	20200923-H-1	H	Figure 2 / 3 cycles / 30	AAAACAAACAAAAACCCAA	ACAAAACAA
31	20200923-H-2	H	Figure 2 / 3 cycles / 31	AAAAAACAA	AAAACAAAAAAAAACC

## Sheet: 3 Cycles, Habituation + Trainin
	Figure 3
	Male parent: SS00864-Gal4; Female Parent: UAS-CsChrimson
	Training protocol: 18 habituation cycles, followed by 3 cycles of paired training
Number	Animal ID	Apparatus	File Path	Naive decision sequence	Post train decision sequence
1	20201114-B-1-H-3	B	Figure 3 / 3 Cycles, Habituation + Training / 1	CAAAAAAAACAACCAAAAAAAAACACAAAAAAACAACCAACCAAAAAAAACAACAACCAAAAAACACAAAACACAAAACAAACA	AAACCAAAACACAACCCACAAACCACCACAACCCCCCCACACAACACACAAACCAACAACCACCACAACAACCACAAAAAAAACACAACACAACAACACCACCCCACCACCCCCAACCCACCCCCCAACACACC
2	20201114-C-1-H-3	C	Figure 3 / 3 Cycles, Habituation + Training / 2	AACACAAACAA	ACCCACACCAAAACCACACAA
3	20201114-D-1-H-3	D	Figure 3 / 3 Cycles, Habituation + Training / 3	CAAAAAAACAAAAAAAAAAACACAAACACAAAAAACCCAAAAAACAACAAAAAAACACAAAAAAACAACAAC	AACACAAAACCAACAAACAAAAAAA
4	20201114-E-1-H-3	E	Figure 3 / 3 Cycles, Habituation + Training / 4	AAAAAACAAACAAACAAACAAACAAAAAACCAACAACAAAACAACCA	AAAAACACCAAACAACAACAAACCAACA
5	20201114-F-1-H-3	F	Figure 3 / 3 Cycles, Habituation + Training / 5	CCAAAAAACACAAAAAAACCAAAAAAAAACCAAAAAACCAAAAACAAAAACACCAACAACAAAAACAAAAACCAAAAAAACCAAAAACCAAAA	ACAACCCAACCAACACCC
6	20201114-G-1-H-3	G	Figure 3 / 3 Cycles, Habituation + Training / 6	AAAAACCAAAAAACCAAAAACAAACCAAAACAAAACCACAAAAAACACCCAACAAAA	ACACCACAAACCACAACCC
7	20201114-H-1-H-3	H	Figure 3 / 3 Cycles, Habituation + Training / 7	CAAACCAAAACAAAAAAACACAACAAAAAAAAAAAAAAAAACAAAACCACAAAAAAACACAAAAAACACACAAA	AAAACCA
8	20201114-N-1-H-3	N	Figure 3 / 3 Cycles, Habituation + Training / 8	AAACCCAAAACAAAAACAAAACAAACAAACAAAACAACAACAAAAAAAAACCAAACAAACA	CCAAAACCCAAACAACCCAAAACCCAACCCACCACCACCAAAACC
9	20201118-B-1-H-3	B	Figure 3 / 3 Cycles, Habituation + Training / 9	CCAAACAAAAAACCAACAAAACCAACAAAACAACAACACCAAAAAC	CCAAACAAAAAACAAAAACAAACCACCA
10	20201118-D-1-H-3	D	Figure 3 / 3 Cycles, Habituation + Training / 10	ACAACAAACAA	CCCCAACAACACCAACAC
11	20201118-D-2-H-3	D	Figure 3 / 3 Cycles, Habituation + Training / 11	CAACAACAAAACACAAACACCCCACAAAAAACAACAAAAACACCACAACAAAAACCCCAAAAAAAAACA	ACACACACCAAAAACAAAAA
12	20201118-E-1-H-3	E	Figure 3 / 3 Cycles, Habituation + Training / 12	CCAAAAACCAACAAACAAAA	ACCACAAAACAAAACACAA
13	20201118-E-2-H-3	E	Figure 3 / 3 Cycles, Habituation + Training / 13	CAACAAACAAACAAAACAAACACAC	CAAAACA
14	20201118-H-1-H-3	H	Figure 3 / 3 Cycles, Habituation + Training / 14	AAC	CCCAAACCCCCACACCACCAACACAACCACACCCCACAACCAACCACCAAACCAAAACAACCCACACCCA
15	20201119-B-1-H-3	B	Figure 3 / 3 Cycles, Habituation + Training / 15	CAAAAAAACAAACCAAACCAAAAAACAAAACAAACCAACCAAAAACCAACCAAAAACCAA	AACACCAACAACCCACAACCCCCCAACACCACAAA
16	20201119-F-1-H-3	F	Figure 3 / 3 Cycles, Habituation + Training / 16	AAACAACACAACAAA	ACAAACAAACCCAACCCCCACACAACCCCCAA
17	20201119-G-1-H-3	G	Figure 3 / 3 Cycles, Habituation + Training / 17	CAAAAACAACCAACAACCAAACAAAACCCAAAAACACACCAAAAAACCAAAACCAAACAA	ACACCCC
18	20201119-H-1-H-3	H	Figure 3 / 3 Cycles, Habituation + Training / 18	ACCAA	CCAAAACCCAACCAAACACAA

## Sheet: 3 Cycles, Training + Extinction
	Figure 3
	Male parent: SS00864-Gal4; Female Parent: UAS-CsChrimson
	Training protocol: 3 cycles of paired training, followed by 18 extinction cycles
Number	Animal ID	Apparatus	File Path	Naive decision sequence	Post train decision sequence
1	20201114-B-1-E-3	B	Figure 3 / 3 Cycles, Training + Extinction / 1	CAAAAACCAAAAAACAAAACAAACAAAAAAAAAACACAAAAACCCACAACCAACAAAAAAACCAAAAAACAACACCAAACACACCAAACAAAAACCCCAAAAAAACACAAACAAAACAAACCAAAAAAAAACACAAA	CACCAAACACAAACCAAAAAAAAACCAAAAAACAAAACAACACAAACACAAAAACCAAAAAACCCACAACCAAAACACCCACAACAAAAACAACCAA
2	20201114-C-1-E-3	C	Figure 3 / 3 Cycles, Training + Extinction / 2	CCAAAAACAAAAACCAAAACAAAAAACACAAAAACACCAAACACCAAACACAAAAAAAAACAAAAC	AACACA
3	20201114-D-1-E-3	D	Figure 3 / 3 Cycles, Training + Extinction / 3	AAACCAAACAAAAACCAAAAA	ACCAAAAACCAACAACACCCAAAACAAAAACCAAAAA
4	20201114-E-1-E-3	E	Figure 3 / 3 Cycles, Training + Extinction / 4	ACAAAAAAAACAACCAAAAAACAA	CCAAACC
5	20201114-F-1-E-3	F	Figure 3 / 3 Cycles, Training + Extinction / 5	ACAAACAA	AAAACCA
6	20201114-G-1-E-3	G	Figure 3 / 3 Cycles, Training + Extinction / 6	AAAAACAAAAACCAAAAAACAACAAACAAAACCA	AACAAACAAAAACCAA
7	20201114-N-1-E-3	N	Figure 3 / 3 Cycles, Training + Extinction / 7	CCCAAAAAACCAAAACAAAACAAAAAAACAAACAAAAAAAAACAA	AAAAAACAACACAACAACAAA
8	20201118-C-1-E-3	C	Figure 3 / 3 Cycles, Training + Extinction / 8	ACACAAACCCACAAAAA	CAAAAACAACCAACACAAACCAAACAAC
9	20201118-C-2-E-3	C	Figure 3 / 3 Cycles, Training + Extinction / 9	CAAACCAACAAA	CCCACA
10	20201118-F-1-E-3	F	Figure 3 / 3 Cycles, Training + Extinction / 10	AAAAACACCACACAACAAACCAAAAACACAAC	AACCACAAA
11	20201118-F-2-E-3	F	Figure 3 / 3 Cycles, Training + Extinction / 11	ACCCAAAACCAAAAAAACCAACAAAAACAACAAACACAA	CAAACAACAACACAACAAC
12	20201118-G-1-E-3	G	Figure 3 / 3 Cycles, Training + Extinction / 12	CAAA	AACAA
13	20201118-G-2-E-3	G	Figure 3 / 3 Cycles, Training + Extinction / 13	ACAACCAAACAAACAA	ACAACCCCAAA
14	20201118-N-1-E-3	N	Figure 3 / 3 Cycles, Training + Extinction / 14	ACAACAAAAACACCAAA	AAAAAC
15	20201119-C-1-E-3	C	Figure 3 / 3 Cycles, Training + Extinction / 15	AAACAACCAAAAAAAACAAACCCAAAAAAAAACCACACCCAAAACCACAAAAAAAACAAACACA	AAAACACAAC
16	20201119-D-1-E-3	D	Figure 3 / 3 Cycles, Training + Extinction / 16	ACAACAACAAA	AACACAA
17	20201119-E-1-E-3	E	Figure 3 / 3 Cycles, Training + Extinction / 17	CAAAAAACAACAAACCCAACAACAAAAACACAACA	ACAAAAACCAAACACACAACACAA
18	20201119-N-1-E-3	N	Figure 3 / 3 Cycles, Training + Extinction / 18	CAAA	CCAAACACAA
19	20201123-C-1-E-3	C	Figure 3 / 3 Cycles, Training + Extinction / 19	AACAAAAAAC	AAAAAACAACCACAAAACACAACA
20	20201123-C-2-E-3	C	Figure 3 / 3 Cycles, Training + Extinction / 20	AAACAAAAAACACAAAAAACACACCACACAAAACCAACCAAAAAACAAAAACAACACAAAAAACCACAAAAC	ACAACAAAACAACA
21	20201123-D-1-E-3	D	Figure 3 / 3 Cycles, Training + Extinction / 21	AAACAAACAAAAAACAACAAAAACAACCACAAAAC	AACCAAACAACACACCC
22	20201123-E-1-E-3	E	Figure 3 / 3 Cycles, Training + Extinction / 22	AACAAACACAAAAAAACAACACAAAACCAACCAAACCAAAACCCACCAAAACCAAACAAAACACAACACA	AACAACACAAAAAACAAACACCACAAAAACCAACAAACCCCAAAAACACACCAAA
23	20201123-F-1-E-3	F	Figure 3 / 3 Cycles, Training + Extinction / 23	AAAAACAAAAACCCAAAAAAAAACCAAACCACACAAACCAAACCAAACAAAAA	CAAAAAAAAAACCAAAAACA
24	20201123-H-1-E-3	H	Figure 3 / 3 Cycles, Training + Extinction / 24	AAAAAAACAAACA	AAAACACACAACACAAAAACAAAAAACAAAACACACACAAAAAAACAAACAAAAA
25	20201123-N-1-E-3	N	Figure 3 / 3 Cycles, Training + Extinction / 25	AAAAACCCAAAAAACAACAAAACCAA	CACCAAACCAAAACCAAAAAAAAAACAAAACCCAAACCACCCAAAAAAACAACAAAACCAAAAA
26	20201123-N-2-E-3	N	Figure 3 / 3 Cycles, Training + Extinction / 26	CCAAAAAACCACAAAAACCCAAACAAACCAAAAAACAAAACACAACCCAAAAAAAAAACACAAAAACCACACAACAAACCCCAAAACAAACAAACACCAAACAAACAAA	AAAACAAAACACAAACCAACCACACAACAAAAAACA
			Figure 3 / 3 Cycles, Training + Extinction / 27
			Figure 3 / 3 Cycles, Training + Extinction / 28
			Figure 3 / 3 Cycles, Training + Extinction / 29
			Figure 3 / 3 Cycles, Training + Extinction / 30

## Sheet: 4 Cycles, Training
	Figure 3
	Male parent: SS00864-Gal4; Female Parent: UAS-CsChrimson
	Training protocol: Paired training; repeated 4x
Number	Animal ID	Apparatus	File Path	Naive decision sequence	Post train decision sequence
1	20200919-B-2	B	Figure 2 / 4 cycles / 1	AAAAAAAACAACAAACAAAACAAACCAAACCAAACAAAAAAAAACCAACAACCAAAC	CACACCACCAACA
2	20200919-F-1	F	Figure 2 / 4 cycles / 2	AAAAACCAAAAACCACAACAACAAACA	ACCACCAC
3	20200919-G-1	G	Figure 2 / 4 cycles / 3	AAAAAAACAAACAAACAACAAAAA	ACCACACACAACAA
4	20200919-G-2	G	Figure 2 / 4 cycles / 4	AAACACAAAAACAAA	AACCCC
5	20200919-H-1	H	Figure 2 / 4 cycles / 5	CAAAACAAACAAAAAA	AAAACCA
6	20200921-B-2-4	B	Figure 2 / 4 cycles / 6	AACCAAAAAAAACAAAACAAAACAA	ACAAAAACAAACAACCCAAAAACACACCACCCAAACAACCACCAACACACAA
7	20200921-C-1	C	Figure 2 / 4 cycles / 7	ACAACAACAAAAAACAAAAACACAACAA	CCCCCCACCACACCACAACCCCACCCAAACACAAAACCCAAA
8	20200921-E-1	E	Figure 2 / 4 cycles / 8	AAAAACAACACACAACACCACCAACAAAAACAAACAAAACCAAAAACACCAAAAAAA	AAACA
9	20200921-G-1	G	Figure 2 / 4 cycles / 9	AAAACAACAAAACAAAACACAAAAAAACAAACACAAAACAAACAACCAAAACAACA	CAAAAACCCCAAACCACACAACAACCAACACCAAAAACAACACCCAAAACAACAAACAAACACCCACCAACACCAACCCAAACACACCACACCAAC
10	20200924-B-2	B	Figure 2 / 4 cycles / 10	AAAACAACAAAAACAACACAAACAAAACAAACCAAAACAAAAAAAAACACCACCACAACAACAAAAACCCAACAAACCCCAAACAACACCACACAAAAAAAAACC	ACACACAACACAAACAAACAACAAAAACAACAACACACCCCCAAACACCACACAAACAACACCCAACA
11	20200924-D-2	D	Figure 2 / 4 cycles / 11	AAAAAAAACAAAACAAAAAAAACACCAACCCAAAAAACAACACCACAAAAAAAACAAAACACCACACAAACAACCACAAACACAACAAACAAC	AACCCACCAAACCCAACAACACAAAAACA
12	20200924-E-1	E	Figure 2 / 4 cycles / 12	AAAAACACAAAAACAAAAAAAACACACAAAAC	ACCAACCAAAAACCCCCAAACA
13	20200924-E-2	E	Figure 2 / 4 cycles / 13	CAACCAAAAAAAAAAAAAACCACAAAAAACCACACAAA	ACCCCCAAAACACCCAAA
14	20200924-F-1	F	Figure 2 / 4 cycles / 14	AAAAACACAACACAAACCACAAAAACAACAACAAA	CAAACCAACACCAACCCACACCACAAAAACCACACCAACACCCCCCCCAAAACCCACCCCCACACCCACCCCACACCACAACAACACAAA
15	20200924-F-2	F	Figure 2 / 4 cycles / 15	AACAAAAACCAAAA	CCACCCAACAAACAAAACCCAAACAACCCCAACAACACCACAACCACCAAAAAAACACAAACCAAC
16	20200924-G-2	G	Figure 2 / 4 cycles / 16	ACAAAAAACCAAACAAAAAACACCCAAACAAACAACAACA	AAACCACCACCCCCA
17	20200924-H-1	H	Figure 2 / 4 cycles / 17	ACAACAA	AAACACAA
18	20200924-H-2	H	Figure 2 / 4 cycles / 18	CCAAACAAAACAAAAAA	ACCCCAAAACAACCACAACCCCACAAACCCCACCAACCAACAAACAACCACCCAACAAACCACA
19	20200925-B-1	B	Figure 2 / 4 cycles / 19	AAAAACCAAAAAAAC	ACACCCC
20	20200925-B-2	B	Figure 2 / 4 cycles / 20	AAAACAAAAAACAAAAAACCACAAACA	CCAACACCCAACCACAAACACCAACACCACACCCCACCACCAA
21	20200925-D-1	D	Figure 2 / 4 cycles / 21	AACAAAAAAACAAAACCACAACAAAAAACAAA	ACACAAAACCACCCCACAACCAACCAACCAAAACCACC
22	20200925-E-1	E	Figure 2 / 4 cycles / 22	ACAAACAAAAAACAAAAAAACA	ACACACACACCCCACCAAACAAAACACAAAACACCCCCC
23	20200925-F-1	F	Figure 2 / 4 cycles / 23	CAAAAAACAACACCCAAAAAACAAAACAACAAAAAAAAAA	CACCCAACACAACACCAAACAACCCAAAACCAAAACAAACCAAAACAACCACCCCCAACCCACAACAAACCACACACCAACCACACAACAACCCC
24	20200925-G-1	G	Figure 2 / 4 cycles / 24	CAACAA	ACACCACCCCCCC
25	20200925-H-1	H	Figure 2 / 4 cycles / 25	CAAAA	AAAA
26	20200928-B-1	B	Figure 2 / 4 cycles / 26	ACAAAAA	AACACCAC
27	20200928-C-1	C	Figure 2 / 4 cycles / 27	AACAAAAAACAAAAAA	CCAAAAAAACAAAA
28	20200928-C-2	C	Figure 2 / 4 cycles / 28	AAAAACACAAAAAACCAAAAACCAAAACAAC	AAAAAACACCACA
29	20200928-D-1	D	Figure 2 / 4 cycles / 29	CAAAAAAAACCAAAAAACAAACAACAACAAACAAAAAAA	AACCCAACACAACCAACCACCCCACCACCCCCCCCCCACCCACACCCCCACCACAACCCCCCACAACACCAAAAACAC
30	20200928-E-1	E	Figure 2 / 4 cycles / 30	AAACAAACA	ACAAAA
31	20200928-F-1	F	Figure 2 / 4 cycles / 31	AAAAAACACAACCAACAA	CCCACCA
32	20200928-G-1	G	Figure 2 / 4 cycles / 32	AAAC	CCAACACCCCCAAAAC

## Sheet: 4 Cycles, Habituation + Trainin
	Figure 3
	Male parent: SS00864-Gal4; Female Parent: UAS-CsChrimson
	Training protocol: 18 habituation cycles, followed by 4 cycles of paired training
Number	Animal ID	Apparatus	File Path	Naive decision sequence	Post train decision sequence
1	20201112-B-1-H-4	B	Figure 3 / 4 Cycles, Habituation + Training / 1	ACAACAAAAAAACAAAACCAAAAAAAACCACAAACCAAAACAACACAACAACAACAAAAACCCCAAAAAACCAAAACCAAAACAACAAACAAAACCAAAAACAAAA	CCACCCAAACCCCAACAAAACCACCCACCCACCCAACAACAACAAAA
2	20201112-C-1-H-4	C	Figure 3 / 4 Cycles, Habituation + Training / 2	ACCACAAAAAAAACCAAAAAAACCAAAAAAAACACCAAAAAAAAACCAAAA	CACACAACACAAACCCACCACCCCAACCACC
3	20201112-D-1-H-4	D	Figure 3 / 4 Cycles, Habituation + Training / 3	CCAACAAACAAACACAAACAAAAACAAAAACAAAACCAAAAAAACAAAAAAAACAAAAACCCAAAAA	ACACCCCCCACACCACACCACCCCCACCCACCACACCACAAAACACAAACCCCCCACCAAAACACCAAAACCCACAACCCCAAAAACC
4	20201112-E-1-H-4	E	Figure 3 / 4 Cycles, Habituation + Training / 4	AAACAAAAAAAAAACAAAACAAACAAAACACAAAAAAACAAAAAC	CACCCCAAACCAACACAACCCCAAACCACCC
5	20201112-F-1-H-4	F	Figure 3 / 4 Cycles, Habituation + Training / 5	CAAACAAAAACAAAACCAAAACCAAAAACAACCAACAAACAAAAA	CCAAACCACCACCCCAC
6	20201112-G-1-H-4	G	Figure 3 / 4 Cycles, Habituation + Training / 6	ACAAACCAAAAACACAAAACAAAAAA	CAAACCACAAACAAAA
7	20201112-H-1-H-4	H	Figure 3 / 4 Cycles, Habituation + Training / 7	CACAAAAACAAACAAAACAAAACAACCAAAACAAAAACAACCAAACAACAAAA	AACCACACCCCCACAACACCACAAAACCAAACACCAAACCACCCCACACCC
8	20201113-B-1-H-4	B	Figure 3 / 4 Cycles, Habituation + Training / 8	AAACCCAAAAACAACAAAAAAACACAAAAAACCAAAACAAAAAAACCAACAAAAAACACAAACACAACAAAAAAACCACAAAAAACAAAAAAAAACAAACCAAACAAAAAACCAACAAACAAAAAAAAA	ACCAAACCAACAACACCCCACCAACCACACACCAACCCACAAAAAAAACAACCCACAAACCAAAACACAAACCCCCACACACCACCCACCCACACACCAAACCACACAACACCACCACCAACCAAAA
9	20201113-B-2-H-4	B	Figure 3 / 4 Cycles, Habituation + Training / 9	AAACAACACAAACCACACAAAAAAAACAAACCAAACAACAAAAAAAACCAAAACACACCACACAAAAAAA	AACAACACCCCCACCCCAACCCCAACACACACACCACCACCACAAACCACCCCAACAACCA
10	20201113-C-1-H-4	C	Figure 3 / 4 Cycles, Habituation + Training / 10	AAAAAAACAAAACAAAAAAAAAAACCACCAAAAA	CAACCACAACACCACAAACCCACACACACACA
11	20201113-D-1-H-4	D	Figure 3 / 4 Cycles, Habituation + Training / 11	AAAAAAACCAAAAAAACAAAACAACAAACCAAAAAACAACAAAAAAACAAAAAAAAACACAA	CACCCCCCCCCACCACAACACACAACAAACA
12	20201113-D-2-H-4	D	Figure 3 / 4 Cycles, Habituation + Training / 12	AACACAAAA	CACAAACAAAACAACAACAA
13	20201113-E-1-H-4	E	Figure 3 / 4 Cycles, Habituation + Training / 13	AACCAAACACAAAA	CCCACACCACACAACCAC
14	20201113-F-1-H-4	F	Figure 3 / 4 Cycles, Habituation + Training / 14	AACCAAAAACACCAAACAAACCAAAACAAAAACCA	ACAAA
15	20201113-F-2-H-4	F	Figure 3 / 4 Cycles, Habituation + Training / 15	ACAAACAAAACAAACAAAACAAAACCACAAACAAAA	ACAACACCAACCACACCACCAACACAAACCAC
16	20201113-G-1-H-4	G	Figure 3 / 4 Cycles, Habituation + Training / 16	AAAAACCAACAAAACACCAAAAAAA	ACACAAACACCCC
17	20201113-H-1-H-4	H	Figure 3 / 4 Cycles, Habituation + Training / 17	ACAAAAAACAACAACAACAAAACCCAAAAACCAAACCAACAAAACCAAACCAAACCACAAAACCAAAACACCAAAACAAAACAAAAACA	ACACAAAAAACACACCAACCAACCAAACCCAACAAACACCCAAAAAACCAACAACCAAAAAACAAAACCCCCA
18	20201113-N-1-H-4	N	Figure 3 / 4 Cycles, Habituation + Training / 18	AAACACAAAACCAAAAAACAAAAACAACCAAACAAAAACCCAAC	ACCAACAACCCACACAAACCACACCCCAACA

## Sheet: 4 Cycles, Training + Extinction
	Figure 3
	Male parent: SS00864-Gal4; Female Parent: UAS-CsChrimson
	Training protocol: 4 cycles of paired training, followed by 18 extinction cycles
Number	Animal ID	Apparatus	File Path	Naive decision sequence	Post train decision sequence
1	20201112-B-1-E-4	B	Figure 3 / 4 Cycles, Training + Extinction / 1	CAAACAAAACCAAACCACAAAAAACAAAAAAAACAAAACAACAACAAAAAAACAAAACACA	AAAAACAAAAAACACAAACAAAACCAAACAACACAAAAAACAACC
2	20201112-C-1-E-4	C	Figure 3 / 4 Cycles, Training + Extinction / 2	AAAAACCAAAAAACAAAAC	CCCACACCCACACACAAA
3	20201112-D-1-E-4	D	Figure 3 / 4 Cycles, Training + Extinction / 3	AAAACAACAACAAAAACAAACAAACAAAACAAA	ACAAAAAAAAACCA
4	20201112-E-1-E-4	E	Figure 3 / 4 Cycles, Training + Extinction / 4	CAAAACAAACAACACCAAAACAAAAACACAAAAACCAAAACAACA	AAAAAACCCACA
5	20201112-F-1-E-4	F	Figure 3 / 4 Cycles, Training + Extinction / 5	CAAAAACAACAAAAAAAACAAAAAAAAAAACAAAAAACAAAAACCAA	AAACAAACCCCAACACAACCCAACACAACCA
6	20201112-G-1-E-4	G	Figure 3 / 4 Cycles, Training + Extinction / 6	AAAAACAAACCACAAACAAAAAC	CCACCCACCCACACACCACACACACCCCAACCACCCAACAACACAACCAACCCCACCAC
7	20201112-H-1-E-4	H	Figure 3 / 4 Cycles, Training + Extinction / 7	CAAAAACAAAAAACAAAAACACAACAA	ACCAAAAACAA
8	20201113-B-1-E-4	B	Figure 3 / 4 Cycles, Training + Extinction / 8	CAAACAAACAACAAAACCCAAAACAAAAAACCAAAAAACAAAACAAAAAACCCAAAAAACAACAAAAACCAAAAAACAACAAAACAAAACACCAAACCAAAAAAAACCAACAACCAAAAAAAAC	CCCCCCCCAAAAAACAAAAAAAAACCCACAACCCCAACACCCC
9	20201113-C-1-E-4	C	Figure 3 / 4 Cycles, Training + Extinction / 9	ACAAAAAAAAACACAAAACCCAAAAAACAACAAAAACAAAACAAAAAAACACCAAAACAAACCAACCCAAAAAC	ACA
10	20201113-C-2-E-4	C	Figure 3 / 4 Cycles, Training + Extinction / 10	AACAAAAAAACAAAAACCCACAACAAACAACAAAACAC	AACCACAAAAAACA
11	20201113-D-1-E-4	D	Figure 3 / 4 Cycles, Training + Extinction / 11	AAAAAACACAACCAAAAAACCAAAAAAAAAACACAAAAACAACCAAACACAACCCACAAAAAA	ACCACACACCACAAAACCCACACCCACCAACCACCACCAAACCCAAACAAAC
12	20201113-E-1-E-4	E	Figure 3 / 4 Cycles, Training + Extinction / 12	AACACAAAAAAAACCACAAAAAAAACAAAACAACACCAAAAAAACCAACAACAAACAACACCACACAACAAAAAAAAAACAAA	ACAACACCCACCCCCCCC
13	20201113-E-2-E-4	E	Figure 3 / 4 Cycles, Training + Extinction / 13	CAAAAAACAACAAAAACAAAAAACAACAAACAAACAAACCAAAACCAA	ACAAAACACACACAACAAAACCCCCCCAACACA
14	20201113-F-1-E-4	F	Figure 3 / 4 Cycles, Training + Extinction / 14	AAACCAAAAAAAACAAAAACAAACAAAAACACC	CAACACACCCCAAACCAAACAACCCCACCCACCACACCCACCACACAACAAAACCA
15	20201113-G-1-E-4	G	Figure 3 / 4 Cycles, Training + Extinction / 15	ACAAACAAAACACAAAAAAAACCAACAAAAAAACCAACACCCAAAAAAAAAA	ACCACCCAACACCAACAAAACCCAAA
16	20201113-G-2-E-4	G	Figure 3 / 4 Cycles, Training + Extinction / 16	CAAAACAAAAAACACAAAAACACACACAAAA	AACACAAAACCAACAA
17	20201113-H-1-E-4	H	Figure 3 / 4 Cycles, Training + Extinction / 17	ACAAAAACAAAAACCAAAAAAACCCAAAAACAAACCAAAAAAACCAAAAAAAACC	CCCCCCACCCCAAAAACCCACAAAAACAAAAACCAACCCCCCAACACAACCACCAAAAACCACACAAA
18	20201113-H-2-E-4	H	Figure 3 / 4 Cycles, Training + Extinction / 18	AAAACAAAAAAAAAAAACCAACAACAA	AAAACAACCAAAACAAAACAACACACAAACAAACCACACAACAAACAAAAAACCAACAAAAAACCAAAAACACAAAACAA
19	20201113-N-1-E-4	N	Figure 3 / 4 Cycles, Training + Extinction / 19	AAACCAAAAAAAAAACCAAAAAACCCAAAAAACAAACCAAAACCAAACAAAAACAAAACACCACAAAACACACCAAAACAACAA	ACAAACAAAA
20	20201123-B-1-E-4	B	Figure 3 / 4 Cycles, Training + Extinction / 20	CACAAAACCAAAAACAAACACAACAACAACAACACAAAAACACAACAAAACA	CACAAAACCCACAACCAAA
21	20201123-B-2-E-4	B	Figure 3 / 4 Cycles, Training + Extinction / 21	CAACACAACCAAACAAAAAACAAAACCAAAAAAAAACACAACCAACCAAACACCAACAAAAAAAAAACCAAACAAAAAAACAAAC	CACCAAAAACCACCCACACACCAAAAACACCCACCAACACCCCACACACAACCAACACCACCCACAAAAAACCC
22	20201123-D-1-E-4	D	Figure 3 / 4 Cycles, Training + Extinction / 22	AAACAACCCAAAAACCACAAAAACCAAAACACAAAA	CACCACAACACCCAAACAAAAAACAAA
23	20201123-E-1-E-4	E	Figure 3 / 4 Cycles, Training + Extinction / 23	CACAAAAAAACAAACAACAAACCAAAAAAACAACCACAAAAAACCAAAAAACACAAAACCCACAACACCCAAAAAAAAACAAACAAAACAAAACAACCAAAAAAACAAAACAAACA	AAAAAAAAACAAAA
24	20201123-F-1-E-4	F	Figure 3 / 4 Cycles, Training + Extinction / 24	AAAACACAAAAAACACAAAAACAAAACAA	CAACCCC
25	20201123-G-1-E-4	G	Figure 3 / 4 Cycles, Training + Extinction / 25	ACAAACCAAAAAAAACAAA	ACACCAACCCCAACCCAACACCCCACACCACACACCCCCCAAAACACAACAAACAACCCAC
26	20201123-G-2-E-4	G	Figure 3 / 4 Cycles, Training + Extinction / 26	CCAAAAACCAAAAACAAAAAACACACAACACCAAAAACAAACAAAAACAAAAAAACACAACAAAACCACAAACCCAAAACAAAAAAACAAAAACAAAAACACCACACAAAACCAAAACACACAAAAAAAC	ACACCCACCCAACAAAACACAACAAACCACCCAAACCCAAACACACCCCAAACACCC
27	20201123-H-1-E-4	H	Figure 3 / 4 Cycles, Training + Extinction / 27	CAACCAAAAACAACAAACCAAAAC	A

## Sheet: 5 Cycles, Training
	Figure 3
	Male parent: SS00864-Gal4; Female Parent: UAS-CsChrimson
	Training protocol: Paired training; repeated 5x
Number	Animal ID	Apparatus	File Path	Naive decision sequence	Post train decision sequence
1	20200729-B-1	B	Figure 2 / 5 cycles / 1	ACAACAAAAAAAACACAAACAAAACACAAAACAAAAACACAACAAAAACCAAACAACACCAAACAAAAAAACCAACAAACAAAAACCAAAAACACCACCAAAAAAACACAAA	CCCAACCAA
2	20200729-B-2	B	Figure 2 / 5 cycles / 2	AAACAAAAAAACAAAACAAACAAAAACAACACAAAAACAACACACAAAACAAAAACACCAAAACCAACAAACAACAACAAAAAAACCCAAACACACAACAACACAAACACAAAAAACAAAACAAAAAA	CCAACCAACCACCACACACCCCAAACCCACAAAACACAAACACCCACCCAACCCCAAACAACAACAACAAAACACACACCCCACCACAAAACACAACACCAA
3	20200729-C-1	C	Figure 2 / 5 cycles / 3	AAAAACAAACAAACAAAAACCAAAAAAAAAACAAAACAAAAAAAACAAAAACAAAA	CCCCAACAACACAAACCAAACCCCACAAAAAAAACCAACAAACAAACCAAACCCAA
4	20200729-C-2	C	Figure 2 / 5 cycles / 4	AAAACAAAACCAAAAAAACCAACCACACACCCCACACAACAAAACCCCAAACCAAAACAAACACAACAAACACCAAAAAAAAAAACAAAA	CAACACAAACACACACCCCAACCAAAAACACCAAAACCACCCCCCCAAAACACCCAACACAACAA
5	20200729-D-1	D	Figure 2 / 5 cycles / 5	AAACAAAACA	CCCAAAACAACACCCCCCCCCAACCACCACAAAAACAACAAACAAACCCAAACCCACAAAACACCCACAACCCCCA
6	20200729-E-1	E	Figure 2 / 5 cycles / 6	CAAAAAAA	ACACACACCA
7	20200729-F-1	F	Figure 2 / 5 cycles / 7	AACAAAACCAAAAAAAAACCAACACAAAAAAACAACCACAAAAACAACACACAAAAAAAACCCCAACACAAAAAA	ACCACCCCCCCAAAAAACCACAAACACCCCCACACCAAAAAACACCACCCCAACCAACCCACACAACAAACACCC
8	20200729-G-1	G	Figure 2 / 5 cycles / 8	ACAAACACCAAAAAAAAACCAAAAACCAA	AAAACCAACCCACAACCCACAAA
9	20200911-B-1	B	Figure 2 / 5 cycles / 9	AAACAAAAAAACCAAAAACACAAACCACAAAACCAAACAAAAAACAAACAAAAAAACAAAACACCACAAACAACACCAAACACCAAACAAA	CCAAACCAACAACCCACAACCCAACCCACCAACCCAAAAACACCACAACACACAAACAAACCAAACACCCCAACAACCAACCAAACAACAACAACCCC
10	20200911-C-1	C	Figure 2 / 5 cycles / 10	AAAAAAACCAAAACCAAAACCAAAAAACAACCAAAAAAAACACACCAACACAACA	CCACACAC
11	20200911-C-2	C	Figure 2 / 5 cycles / 11	ACCAAAACAACAACAAAACAAAACACA	CCACACCCCACCAACAAAC
12	20200911-D-1	D	Figure 2 / 5 cycles / 12	AAAAAAAAACCCACAA	CCCAAACACC
13	20200911-E-1	E	Figure 2 / 5 cycles / 13	AAACA	CACCCAAA
14	20200911-G-1	G	Figure 2 / 5 cycles / 14	AAAACCAAAACCAACAAAAACACAAACACCAAAA	CCCACAA
15	20200911-H-2	H	Figure 2 / 5 cycles / 15	AAAAAAACAAAAACACCACAAC	ACAAA
16	20200917-B-1	B	Figure 2 / 5 cycles / 16	AAAAAACAACAACAAA	AAACCCACCAACACCCCCCCCAA
17	20200917-D-1	D	Figure 2 / 5 cycles / 17	ACAAACAAAAACAAAACAA	CACCACACCAACCCAAACAAAAACACCCACAAAACCCC
18	20200917-E-2	E	Figure 2 / 5 cycles / 18	AAAACAACACCAACCAAAAAAAAAACACAAA	AAAACCAACCCCCCAACAACACAACACAACCCCCAACACCACAACCCC
19	20200917-F-2	F	Figure 2 / 5 cycles / 19	AACAAAAAACCACCAAACAAACAAAAACAACACAAACACACAAAACAACAAACAACAAAAAAAAAACCACAAAAAA	AAAACAACAACAACAACCCCCAAACCAAAAACCCCACCACCACAAAACACCC
20	20200917-G-2	G	Figure 2 / 5 cycles / 20	AAAAA	CCACACACACAAACCCACACACAAC
21	20200918-C-2	C	Figure 2 / 5 cycles / 21	CAAAAACAACCAACACACAAAAACCCACAAACCCCCAACCACACCCACAAAAACACAAAAAAAAAAA	AAAAAACAACCAAACCACAACCACA
22	20200918-D-1	D	Figure 2 / 5 cycles / 22	AAACAAAAAACACCAAACCACCAAAAA	CAAAACA
23	20200918-D-2	D	Figure 2 / 5 cycles / 23	CCAAAAAACAAACAAACACAACACCAAAAAAACCAAAAAAACACCAAAAA	ACAAAACAAAACCACAAACCAACCCCAAAACAAAACCACCCAACACCCC
24	20200918-E-1	E	Figure 2 / 5 cycles / 24	AAAAAACAACAAACCAAA	CAAACCC
25	20200918-F-2	F	Figure 2 / 5 cycles / 25	AAAACCCAAAAACCAAACAAAA	ACAAACCCCCACCAAACCACACACCCAAC
26	20200918-G-1	G	Figure 2 / 5 cycles / 26	AAAACAAAAACCACAAACCAACAAAAAAACCAAA	CCCAACACA
27	20200918-H-1	H	Figure 2 / 5 cycles / 27	AAAACAAAAACAAACACAAAACAAACAAAAAACAAAACAACAAACAAACAAACCAAC	ACCCAC
28	20200918-H-2	H	Figure 2 / 5 cycles / 28	AACAAAAACAAACCACAAAAACA	CCCCCCAAA
29	20200924-B-1	B	Figure 2 / 5 cycles / 29	ACAAAAAACAACAACAAAAACAAAAACAAAAAAAAACAAAAAAACAACAAAAA	AAAAAACCAACACACAAAAACAAAAAACAAA
30	20200924-C-1	C	Figure 2 / 5 cycles / 30	CAAAAAACCAAAAAACACAAAAAAAC	ACCCAA
31	20200924-D-1	D	Figure 2 / 5 cycles / 31	AAAAACAAA	CACCCCACAC
32	20200924-G-1	G	Figure 2 / 5 cycles / 32	AACAAACAA	CCACAAAACACACCCACAAACACACC
33	20201011-B-1	B	Figure 2 / 5 cycles / 33	CACACAAAAACAAACAAAAAAAACCCACAACACAAAAAACACAAACAAAACAAAACAAAAAACAAAAA	CAACCACCCAACAAACACAAACACCAACCAACACCAAACACCACACCAACAACACCACCAAAACCCCAACACCCCAAAACCACC
34	20201011-C-1	C	Figure 2 / 5 cycles / 34	AAACAAAACAAAAAAAACAAACAAAAACAAAAAACACAAAAACAAAACCAAAAAACCAAAACAAAAAA	CAACACCCACAAAACAACCCCAACACCAACACACCAACCACCAACCC
35	20201011-D-1	D	Figure 2 / 5 cycles / 35	ACAAAACAAACACAACAAAACAACAAAAAACACAAAAAAACACAAAAAAACAACCAAAAACAAAA	ACCCACCCACACAAACCAACAACCACCACCCACCACACCCAACACACCACACCACCCACCAAAAAACCCCAAAACAC
36	20201011-E-1	E	Figure 2 / 5 cycles / 36	AAAAACAAAAAAAACAAAAAACACCCAAAAACACCAAAACAACAAAAAAAACCAAAAAAAAACAAACCACCAAAAAAAAAACACAAACAAACACAAAAAAACACCAACAACAAACAAACAAAAAAC	AAAAACCACCCCCACACACACCCACCCCACCCAAAACCCCAACACACCACCACACACA
37	20201011-F-1	F	Figure 2 / 5 cycles / 37	CAAAACAACACAAAAAAAA	ACAA
38	20201011-G-1	G	Figure 2 / 5 cycles / 38	AAACCAAAAAAACAAACAAAACCAACAAAAAAAAACAAAACAACAAAACACACAACCAAAAAAAAACACACACAAC	ACACCCACCACCACACA
39	20201011-H-1	H	Figure 2 / 5 cycles / 39	ACAAAAAACAAAAAACCACAAAAAAAAAAACACAACAAAAAAACACAAAAAACAAAAAAAAACCAAAAAACAAAACAAACAACCACAAAAAAAAAACACACAAAAAAAAACACAAACAAA	ACCCCACCCCAAACACAACACCCAACCAACCAACCCAAACCCCCCC
40	20201012-B-1	B	Figure 2 / 5 cycles / 40	AAAACAAACACAAAACACAAAAAAAAAACAACCACAACAAAACCACAAAAAAAACACAAACAAACAAA	CCACCC
41	20201012-B-2	B	Figure 2 / 5 cycles / 41	AAAAACCACAAAAAAACAACAAACCAAAAAAACACCAACAAAAAAACCAAAAA	CCCCCAACACAACAACAACCAAAACCAC
42	20201012-C-1	C	Figure 2 / 5 cycles / 42	AAAACACCAAAAAAACAAAACACAAAAACACAAAACACAAAAA	CCACCCACCAACCAACACA
43	20201012-D-1	D	Figure 2 / 5 cycles / 43	AACAAAAAACCAAACCAAACAAAAAAAACCCAACAAAAAAAAACACAAAAACAAAAACAAACCAAACAAACAAAAAACAAACCACCAAACAC	CAACAAACACCACCACAAAACCAACACCCAAACACCCACAACCA
44	20201012-D-2	D	Figure 2 / 5 cycles / 44	AACAAAAACAAAAAACACAACAAAAAACAAAAAACAACCACAAAAAAAAACAAAACAAAAAAAAACCAAAAAACCAAAACAAAAAAAAACACCCACCAAAAAAAAACACAAAAAAACACACC	AACCCCCCCCCAAAAAAACCAAAAACAACCCAACCACCCAACAAC
45	20201012-E-1	E	Figure 2 / 5 cycles / 45	CAAAAAAAACACCAAAACAAAAAAAAACCAAAAACCAAAAAAACAAACACAAAAACCAAAACCCAAACAAAAAACAAAACAAAAACAACAA	CACCAAACCAACACACACACCAA
46	20201012-F-1	F	Figure 2 / 5 cycles / 46	AAAAAAACAAAACACACACAAACAAAACACCAAACAAACACAAACCACCCCACAACAACCCAACCACAAACAACCACCAACCAAAACACCCCACAAAAAA	AAAAAAAAAC
47	20201012-F-2	F	Figure 2 / 5 cycles / 47	AAACAAACAAAACCAAAAAAACACAACAAAACAAACAACA	AACCACACCCAACAACAAACCAACAAACCCACCC
48	20201012-G-1	G	Figure 2 / 5 cycles / 48	CAAACAACAAAAACCAAAAACACAACAACAAAAAAAAA	AACAA
49	20201012-G-2	G	Figure 2 / 5 cycles / 49	CAAAACAAACAAAAAACAAAAA	CAACCCAACACAACCAACCAC
50	20201012-H-1	H	Figure 2 / 5 cycles / 50	AACAAAC	AACCAAAAAC
51	20201013-B-1	B	Figure 2 / 5 cycles / 51	AACAACAAACAAACAAACAACAACAACAAAACAAAACAAAAAAAACAAACCAAAAAAAACAAACAACACCAAAACAAAAAAC	CCCAACAA
52	20201013-B-2	B	Figure 2 / 5 cycles / 52	AAAAAACAAAACCACAAACAAACAAACAAAACCAAAAACAAAAAACAAAAAACCAAAAAAAAAACAAAACAAAACAACAAAAAAACCAAAACAAAACA	ACCCACCAACCAACCAAAAACAAACCACCAAACAAAAAAAAACACCAAACCACCCCCACACCCAACCACAACCACACACAAA
53	20201013-C-1	C	Figure 2 / 5 cycles / 53	CAAAAACAAAAACACAACAACAAAAACAAACCAAAACAACCCACCAAAAAAAAACAAAACCAAACACAAAAA	CCAAACAACCACACCAACAACCC
54	20201013-D-1	D	Figure 2 / 5 cycles / 54	CAAAAAAACAAAAACAAAC	AAAACCAACCAACACCACAAACCACACCCCACC
55	20201013-D-2	D	Figure 2 / 5 cycles / 55	CAAAAAAAAAAACCAAACACAAAACAAAAAACAAAAACCAAACCACAAAACCAACAAAAAACAACCCAAAAAAAACAAAACAAAACCAACCCCAAACACCACCA	CCCCAACCACACAAAAACCAA
56	20201013-E-1	E	Figure 2 / 5 cycles / 56	AAAAAACCAAAAAAACAAACAAAACAAACACAAAACAACACAACAAAAA	ACCAAAACCAAAA
57	20201013-F-1	F	Figure 2 / 5 cycles / 57	AAAACAAAACAACAAAAAAAAACAACACAAACACACAAAAAACAAAAAAAACAAAACAAAAAAACAAAACA	AAAAAACCCCAAACCAACCCACCCACCCACCAAACACCCCCACACACCCACACAAAAAACAACCCCAACCACACACACCACA
58	20201013-G-1	G	Figure 2 / 5 cycles / 58	AACCAAAAAAAACCACAAAAA	AACCCCCAACACAAACCA
59	20201013-H-1	H	Figure 2 / 5 cycles / 59	AACAACAACA	CAAC
60	20201014-B-1	B	Figure 2 / 5 cycles / 60	AACAAAACACAAAAACCAAAAAAACAAACAAAAACAACAAACCAAACAAAAACCACAAAAAAACCAAAACCCAACAAAAACAACA	ACAAAACACCACAAACCACCCCAAACCCCAACACAACAACCCAAAAACCCACAAACCCAAA
61	20201014-D-1	D	Figure 2 / 5 cycles / 61	AAAACACACAAAAAAAAACACAAACAACAAAAAAAACCACAAAAAAAACAAAAAAAAACCAACACAAAAAAACAAAAACACACAAAACAACAACACACACAAAAAAAAAACCACAACACAACACAAAAAACC	CAACCCAAAACAAAAACCACCCAAACAACCAACCCCC
62	20201014-G-1	G	Figure 2 / 5 cycles / 62	AAAACAAAAACCAAACACCAAAAACAAAACAACCAAACAACA	CCACAACCACCAAACACCCCACAACACAC

[truncated: 7 more sheets: 6 Cycles, Habituation + Trainin, 6 Cycles, Training + Extinction, 10 Cycles, Training, 10 Cycles, Habituation + Traini, 10 Cycles, Training + Extinctio, Train 3, Ext 18, Train 3, Train 5 Min, Test 15 Min; Repea]
