# Supplementary material for: Switch-like and persistent memory formation in individual Drosophila larvae
Source: eLife. 2021 Oct 12;10:e70317. doi: 10.7554/eLife.70317 (PMC8510578; doi:10.7554/eLife.70317)
Supplement: Figure 4—source data 1. [file elife-70317-fig4-data1.xlsx]

## Sheet: Paired, x20
	Figure 4
	Male parent: SS00864-Gal4; Female Parent: UAS-CsChrimson
	Training protocol: Paired training; repeated 20x; retest larva next day
Number	Animal ID	Apparatus	File Path	Naive decision sequence	Post train decision sequence	Next day decision sequence
37	20200929-B-1	B	Figure 1 / Paired / 37	AAAAAACAAAAAAACAACACACAAAAAAAACAAAAA	AACACACCACCAACAACCACCACACCCAACCACCAC
38	20200929-B-2	B	Figure 1 / Paired / 38	AACACAAAAAAACCCACACAAAAAAAACCAAAAAAAAACCCAACAACAAAA	CCCCAACCAACAACCCAAAAACAACACCCCACCCAACCAACACCACCAACAAAC	AACCCACAACACCAACAACCCACACCCCCCCAAAA
39	20200929-C-1	C	Figure 1 / Paired / 39	AAAAAACACAAACCAAAAAAAACAACAAACAAAAAAAAAACACAAACAA	AACACACAACACCCCAAACC	CCAACAC
40	20200929-D-1	D	Figure 1 / Paired / 40	AACAAAACAACACACAACAAAAAAAAAACAAAAACACAAAAAACAACCAAAAAACCACAAAAAAAAAAAA	ACAACCACACCCCACACCCAACCACACCAACCACCAACCCAACCCACACCCCCCCAAAAAAAACAACCACCCCCCCACC	CACACACCACCAACACACCC
41	20200929-D-2	D	Figure 1 / Paired / 41	CAAAAAAAACAACCAAAA	CCCCCA	ACCACCA
42	20200929-E-1	E	Figure 1 / Paired / 42	AAAACAAAACAACAAACAAACAAACACAAACACCAAAACAAAAACCACAAAAACCCAA	ACACCCACCACCAACCACACCA	CCACAACCCACCACCAACCAAAACAAAACC
43	20200929-F-1	F	Figure 1 / Paired / 43	AAAAACCAAAAAACCAAAACACAAACA	AACCACACCCACAAAAACCACACC	CAACCAAACC
44	20200929-G-1	G	Figure 1 / Paired / 44	AAAACCAACAAAAAAACACAAAAACACCAAAACAACAAAAAACAA	CACCCAACCACCCCCACAC	ACAACCAACAAC
47	20200930-C-1	C	Figure 1 / Paired / 47	AAAACAACAAAAAAACACAAAACACAAAACCAAACCAAAACAAAAAACAAAACAAAACACAAAAAACAAAAAACACAACAA	ACACCC	ACAACCCCCACAACCCAACAACAC
48	20200930-D-1	D	Figure 1 / Paired / 48	ACAAACAAAAAAAAAAAAACCAAACCAAAAACCAAAAACAAACACCAAAAACAACCAACACCACAAAC	CACCAACCAACACAAACACCCCCCCAACCACAAAACCAAAACCCACCACAAAACCCCACACAAACACCACCACAC	ACACACCACACCCACAAACA
49	20200930-E-1	E	Figure 1 / Paired / 49	AAAACAACAAAAAACAAAAAACAAAAACAACAAAAAAACAAAAAACAAAACAAAACAACAACAACCAACAAAAACACAA	AACAACCACACCACCCAACCC	CCCAACACAACCAACCACAA
50	20200930-F-1	F	Figure 1 / Paired / 50	ACCAAAAAAAACCAAACAAAAAAACA	ACACAACACCAACACCACCACACAA	CCCCCACAAACCACCACCAACCCCCAAACAAAACCCAAC
51	20200930-G-1	G	Figure 1 / Paired / 51	AAAAAAACACACCAAAAAAACAAACACCCCAACAAAAAACAAAACAAAACACAAAACCAAAAAAAAACAACCAAACACAA	ACACCACACAACCCCCAACCCAACCCCACAACAACCCACAAACACAAACCCAACCAA	CACAAACCAACACACCAAAACCACCCCAACCCAACC
52	20200930-H-1	H	Figure 1 / Paired / 52	ACAAACAAAAAAAACCAAAAAAAAAAACACCAAAAAAAACAAACCAACAAAACAAAAAACAAAACACCACAAAACCACAAAAAA	AACACACCCCCCAACCAACCACAAACAACAAAA	AACCCAACAC
53	20200930-H-2	H	Figure 1 / Paired / 53	CAAACAAAAAAAAACAAACAAACCACAAAACAAAACCACACAAAAAACAAACAAAACCACAAAAAACACACAACAACAACAAAAAACCAAAAAAA	CACCCAACACCAACCACACACCAACCAACCAACAACACAAAACACAACACACACCACCCACACAAAC	AACAAAACAACCAAAACCAAAACAACAACACAACCCCACAAAACAC
54	20201001-B-1	B	Figure 1 / Paired / 54	AAAAAAAACCAAAAAAAAACACCAACCAAAACAAAAAACACAAAAACAAACACAAAACCAAAAACAAAAAAACAAAACACCAAAAAACACACCAAAAA	AACAACCCACCAACACAAACCACCCACCAACAACCCCCCAACACCCCACCACACACCACCCAAACACA	CACCACCACACACCCAACAACCCACCCCAACCAACAAAAAACCCAAAACACACACCAAAAACACCCCAACACACCACAACCCACAACAACAACCCCACCCCACCAACAACA
55	20201001-C-1	C	Figure 1 / Paired / 55	AAAAACACAAAAACAAAAAAAAAACCAA	CCCAAACA	ACCACAAAACCCCAACCCACACACA
56	20201001-C-2	C	Figure 1 / Paired / 56	CAAAAACAAAAACCAAACACACAAA	CACCACAAACCAA	AACAACCAACCCCCCCAACCCCACCAAAACCAAACCAA
57	20201001-D-1	D	Figure 1 / Paired / 57	AAAAACAACAAAAAAACCAAACAAAAACAACAAAACACAAAAAACACACAACCAAAAAAAACAAAA	CCCCAACACACCCCAACAACCAACACAAACACCAACAACACC	CAAAAACCCACCACCCCCCAACACCACCACACCACCACAACAACACAACACCCAACACCACACCC
58	20201001-D-2	D	Figure 1 / Paired / 58	AAACACAAAAACAAA	CCCAAACAACCCCAAA	CACAAACCACACCACCAAAACACCACCCCACCCCCACACAAACCCCCCCCAAAAACCCCCACAACACCACACA
59	20201001-E-1	E	Figure 1 / Paired / 59	CAAAAAAACCAACAAAACAAAA	AAACCCCACC	CCAAACCCAACCCACACACACCAACCCACACCCCCCACAACCACCCACCACAAAAACCA
60	20201001-F-1	F	Figure 1 / Paired / 60	AAAACACAAAAAAACAAACAAAAACACCAA	ACACCAAAACCCAACAAAACCAAACCAACCCCCACCAAAA	CCACCACACACCACACAAACAACCACCACCACCCAAC
61	20201001-G-1	G	Figure 1 / Paired / 61	AACAAAACACAACAACCAAACAAAAAAA	ACACCACCAA	CCCAAACCCACAACAAAC
62	20201001-G-2	G	Figure 1 / Paired / 62	AAAAACAAAACAACAAAAAACACAAAACAAAAACAAAAACACCAAAAACCCAAAAACCAAAAAACCAAAACAAAACAAAAC	AAAACCCAACCCCAAACCAAC	ACCACACCAA
63	20201001-H-1	H	Figure 1 / Paired / 63	ACAACACACAAAAAAAAACAAAAAAACCAAAAACACCAAAAAACCAAAAACCAAACAAAACAAAAAA	ACAACAACCACCCACCCACCCAAACCACCAACAAACACACACACAAAAAACAAACAAAACAAACAAACAACACCCACACAA	ACCAACCAAACCCCCACCAACAAAAAACCAAAACCAAAACACCCAACCC
64	20201001-H-2	H	Figure 1 / Paired / 64	CAAAAAAAAAACAAAAAAAACCACACACAAAAAACAAAAAAAAAAACAAACACAACAAAAAAACACCAACAAACCAACCACAA	CAAAACCCCCACAACAACCCCAACAAACCACACAACCACACAACCAAACA	ACAAACACAACACACACCCCACCCACAAACACCCCCAACCCCAAACACCCCCCA

## Sheet: Paired x20, only test next day
	Figure 4
	Male parent: SS00864-Gal4; Female Parent: UAS-CsChrimson
	Training protocol: Paired training; repeated 20x; do not test larva immediately following training, but remove to food and test larva next day
Number	Animal ID	Apparatus	File Path	Naive decision sequence	Next day decision sequence
1	20201019-B-1-20	B	Figure 4 / Paired, x20 - Only Test Next Day / 1	CAAAAAACAAAAAAAAACCCAAAAACACAAAAAAACAACAAAAAAACAAAAAACACAAAAAAACACACCAAAAACACAAAAAACAAAACCAACAA	AACCCCCACCAACCACACCAAACACCCCCCACCCCCACACCAACCA
2	20201019-B-2-20	B	Figure 4 / Paired, x20 - Only Test Next Day / 2	AAACAAAAAAACACAACCACAAAAAAACAAAAAAAACAAAAACAAAAACCAAAACCAAAAAAAAACAACAAAAAAACAAAACACCAAAAACAA	CAAACCCCACACACCCACCACAAAAAACACACCACCCAACCAACCCAAACACCCCA
3	20201019-C-1-20	C	Figure 4 / Paired, x20 - Only Test Next Day / 3	AAACAAAAAACAAAAAACCAAAAAACAAAACAAAACACAAAACAAAAACAAAAAAAACAAAACCAAAAAAACCCAAAAAAAAAACACCAACAACACAACC	ACACACCCACCACAAAC
4	20201019-C-2-20	C	Figure 4 / Paired, x20 - Only Test Next Day / 4	ACAAAAACAAAAACAAAAAACCACAAAAAAAAAACCAAAAACCAAAACAAAAC	CCCCCAAACCACACAACAAACCCCCCAACAAAAACCCCAACAACCCCACCAAAACCCACACCACACCCCCA
5	20201019-D-1-20	D	Figure 4 / Paired, x20 - Only Test Next Day / 5	AAAACAAACCAAAAAAAACACAAAACAAAAAAAACAACAACAAAAAAAAACCAAACAACAAAAACAAACAAACCAACAACACCAAAAAAACAAACA	ACCAACAAAAAAAACCCAACCCC
6	20201019-D-2-20	D	Figure 4 / Paired, x20 - Only Test Next Day / 6	AAACAAAAAAACAAACCAAAAAAAAACCCAAAAAAAAAACAAACCACCAACAAACACACAAAAAA	CCACAAACCCCCCCCACACCACACCAACCCAACCCAAACCAACCCAAAAAACA
7	20201019-E-1-20	E	Figure 4 / Paired, x20 - Only Test Next Day / 7	AAACAAAAACAAAACAAACAAAAACACACAACAAAAACCAAAACAAAAAACAAACAAAA	CACACACC
8	20201019-E-2-20	E	Figure 4 / Paired, x20 - Only Test Next Day / 8	CAAAAACAAAAACCAAAAAAAAACAAAACCAACACAAAAACCAAAAAAAA	CACCCACCAAAACCACCAAACAAAACACAACCACCCCCACACAA
9	20201019-F-1-20	F	Figure 4 / Paired, x20 - Only Test Next Day / 9	CAAAACAAAAAAACAAAACAAAACAAAAAAACACAAAAAACAAAACCAAAACCAAAAAAACAAAAAACAAAAAC	ACCACCCCACCCACCAACACCCAACCACCAACACACAAAAACCAAAACC
10	20201019-F-2-20	F	Figure 4 / Paired, x20 - Only Test Next Day / 10	AAAAAACAAAAACAAACAACAAAAAAAACAAAAA	CCAAACAA
11	20201019-G-1-20	G	Figure 4 / Paired, x20 - Only Test Next Day / 11	ACACAAAAAAAAAACAAAAAACAAAACAAACAACCAAACAAAA	CACCCCAAACACAA
12	20201019-G-2-20	G	Figure 4 / Paired, x20 - Only Test Next Day / 12	AAAAAAAAACCAAAACCAACAAAAACAAACAAACAAAAAAAACAACACAACAAAAAACAACACCAAAAAACCAAAAAAAACAAAACACAAACA	CCCCACCAACCAACCACACCACACACCCCACCAACCCACAACAACCAACACACCACAACCACAAAAACAACACAAACACC
13	20201019-H-1-20	H	Figure 4 / Paired, x20 - Only Test Next Day / 13	AAACCAAAAAAAACCAAACCAACAAAAAAACAAAAACAAACAAAAACAACCACAAAACCACAAAAAAAACAAACAAAAAACAAACACAAAAAA	CCCCAACCAAAACACCACCAAACCACCACCACCCCCAAAACCCAACACA
14	20201019-H-2-20	H	Figure 4 / Paired, x20 - Only Test Next Day / 14	AAACAACAACAAAACCAACAAAAAAACAAAACAAAAACCAAAAA	ACACACCCCAACCCCCAACCAACCACAC

## Sheet: Paired x5
	Figure 4
	Male parent: SS00864-Gal4; Female Parent: UAS-CsChrimson
	Training protocol: Paired training; repeated 5x; retest larva next day
Number	Animal ID	Apparatus	File Path	Naive decision sequence	Post train decision sequence	Next day decision sequence
33	20201011-B-1	B	Figure 2 / 5 cycles / 33	CACACAAAAACAAACAAAAAAAACCCACAACACAAAAAACACAAACAAAACAAAACAAAAAACAAAAA	CAACCACCCAACAAACACAAACACCAACCAACACCAAACACCACACCAACAACACCACCAAAACCCCAACACCCCAAAACCACC	ACACCACACCACCCCCCCCAAACCCCCAACACCCACCCAAACACAACAA
34	20201011-C-1	C	Figure 2 / 5 cycles / 34	AAACAAAACAAAAAAAACAAACAAAAACAAAAAACACAAAAACAAAACCAAAAAACCAAAACAAAAAA	CAACACCCACAAAACAACCCCAACACCAACACACCAACCACCAACCC	CACCACCCCACCACCAAAACAAAAACACACCACACCCC
35	20201011-D-1	D	Figure 2 / 5 cycles / 35	ACAAAACAAACACAACAAAACAACAAAAAACACAAAAAAACACAAAAAAACAACCAAAAACAAAA	ACCCACCCACACAAACCAACAACCACCACCCACCACACCCAACACACCACACCACCCACCAAAAAACCCCAAAACAC	AACACCCCCACCCAACACACACCCAAACACCCAAAAAACAAAACACACCCACAACCCCCCCC
36	20201011-E-1	E	Figure 2 / 5 cycles / 36	AAAAACAAAAAAAACAAAAAACACCCAAAAACACCAAAACAACAAAAAAAACCAAAAAAAAACAAACCACCAAAAAAAAAACACAAACAAACACAAAAAAACACCAACAACAAACAAACAAAAAAC	AAAAACCACCCCCACACACACCCACCCCACCCAAAACCCCAACACACCACCACACACA	AACCCACACACAACACCAAAACAAACACCCACCACA
37	20201011-F-1	F	Figure 2 / 5 cycles / 37	CAAAACAACACAAAAAAAA	ACAA	AAACCAAAACAACAA
38	20201011-G-1	G	Figure 2 / 5 cycles / 38	AAACCAAAAAAACAAACAAAACCAACAAAAAAAAACAAAACAACAAAACACACAACCAAAAAAAAACACACACAAC	ACACCCACCACCACACA	CCCCCACAAAACAACCAA
39	20201011-H-1	H	Figure 2 / 5 cycles / 39	ACAAAAAACAAAAAACCACAAAAAAAAAAACACAACAAAAAAACACAAAAAACAAAAAAAAACCAAAAAACAAAACAAACAACCACAAAAAAAAAACACACAAAAAAAAACACAAACAAA	ACCCCACCCCAAACACAACACCCAACCAACCAACCCAAACCCCCCC	CCAACAACCACCCACCACACAACCCCAAAACCC
40	20201012-B-1	B	Figure 2 / 5 cycles / 40	AAAACAAACACAAAACACAAAAAAAAAACAACCACAACAAAACCACAAAAAAAACACAAACAAACAAA	CCACCC	AACACAACAAACCACAACACCAACCCCAAACCAC
41	20201012-B-2	B	Figure 2 / 5 cycles / 41	AAAAACCACAAAAAAACAACAAACCAAAAAAACACCAACAAAAAAACCAAAAA	CCCCCAACACAACAACAACCAAAACCAC	ACACCCACAAAACAAAAACAACAAACAAAACAAC
42	20201012-C-1	C	Figure 2 / 5 cycles / 42	AAAACACCAAAAAAACAAAACACAAAAACACAAAACACAAAAA	CCACCCACCAACCAACACA	AACACACCACCCCAAACAC
43	20201012-D-1	D	Figure 2 / 5 cycles / 43	AACAAAAAACCAAACCAAACAAAAAAAACCCAACAAAAAAAAACACAAAAACAAAAACAAACCAAACAAACAAAAAACAAACCACCAAACAC	CAACAAACACCACCACAAAACCAACACCCAAACACCCACAACCA	CCCCCACAAAACAAACCACAAAACAACAACCACA
44	20201012-D-2	D	Figure 2 / 5 cycles / 44	AACAAAAACAAAAAACACAACAAAAAACAAAAAACAACCACAAAAAAAAACAAAACAAAAAAAAACCAAAAAACCAAAACAAAAAAAAACACCCACCAAAAAAAAACACAAAAAAACACACC	AACCCCCCCCCAAAAAAACCAAAAACAACCCAACCACCCAACAAC	CCACCCAAAACCCCCCAACACCACCAACCACAAACAACACC
45	20201012-E-1	E	Figure 2 / 5 cycles / 45	CAAAAAAAACACCAAAACAAAAAAAAACCAAAAACCAAAAAAACAAACACAAAAACCAAAACCCAAACAAAAAACAAAACAAAAACAACAA	CACCAAACCAACACACACACCAA	CAAACCAAAAAAACAACCAACA
46	20201012-F-1	F	Figure 2 / 5 cycles / 46	AAAAAAACAAAACACACACAAACAAAACACCAAACAAACACAAACCACCCCACAACAACCCAACCACAAACAACCACCAACCAAAACACCCCACAAAAAA	AAAAAAAAAC	ACAAAACAACACAACAA
47	20201012-F-2	F	Figure 2 / 5 cycles / 47	AAACAAACAAAACCAAAAAAACACAACAAAACAAACAACA	AACCACACCCAACAACAAACCAACAAACCCACCC	CACCACACCAACAACCACACA
48	20201012-G-1	G	Figure 2 / 5 cycles / 48	CAAACAACAAAAACCAAAAACACAACAACAAAAAAAAA	AACAA	AACCCAAAAA
49	20201012-G-2	G	Figure 2 / 5 cycles / 49	CAAAACAAACAAAAAACAAAAA	CAACCCAACACAACCAACCAC	CACCACAACCCACCCACACAAAACAAC
50	20201012-H-1	H	Figure 2 / 5 cycles / 50	AACAAAC	AACCAAAAAC	AACAAACCAACAACCAAAA
51	20201013-B-1	B	Figure 2 / 5 cycles / 51	AACAACAAACAAACAAACAACAACAACAAAACAAAACAAAAAAAACAAACCAAAAAAAACAAACAACACCAAAACAAAAAAC	CCCAACAA	AAACAAACCCACCAACAAACAAACAACACCAACAAACCCAACCACA
52	20201013-B-2	B	Figure 2 / 5 cycles / 52	AAAAAACAAAACCACAAACAAACAAACAAAACCAAAAACAAAAAACAAAAAACCAAAAAAAAAACAAAACAAAACAACAAAAAAACCAAAACAAAACA	ACCCACCAACCAACCAAAAACAAACCACCAAACAAAAAAAAACACCAAACCACCCCCACACCCAACCACAACCACACACAAA	ACAACCCCACCAACCAAAAACAAACACACAACAACCACACCCCAAAAACCAAC
53	20201013-C-1	C	Figure 2 / 5 cycles / 53	CAAAAACAAAAACACAACAACAAAAACAAACCAAAACAACCCACCAAAAAAAAACAAAACCAAACACAAAAA	CCAAACAACCACACCAACAACCC	ACCACCACAAAAAAAA
54	20201013-D-1	D	Figure 2 / 5 cycles / 54	CAAAAAAACAAAAACAAAC	AAAACCAACCAACACCACAAACCACACCCCACC	CACCAAAAAAAACCACCAACAAAACCCACCCC
56	20201013-E-1	E	Figure 2 / 5 cycles / 56	AAAAAACCAAAAAAACAAACAAAACAAACACAAAACAACACAACAAAAA	ACCAAAACCAAAA	ACAAAACAACCACAAA
57	20201013-F-1	F	Figure 2 / 5 cycles / 57	AAAACAAAACAACAAAAAAAAACAACACAAACACACAAAAAACAAAAAAAACAAAACAAAAAAACAAAACA	AAAAAACCCCAAACCAACCCACCCACCCACCAAACACCCCCACACACCCACACAAAAAACAACCCCAACCACACACACCACA	ACACCCCACAACCCACACCACCACACCCA
58	20201013-G-1	G	Figure 2 / 5 cycles / 58	AACCAAAAAAAACCACAAAAA	AACCCCCAACACAAACCA	ACCAAAACAAACAACAAAAACAAA
59	20201013-H-1	H	Figure 2 / 5 cycles / 59	AACAACAACA	CAAC	CCACACCAACACAACACCA
60	20201014-B-1	B	Figure 2 / 5 cycles / 60	AACAAAACACAAAAACCAAAAAAACAAACAAAAACAACAAACCAAACAAAAACCACAAAAAAACCAAAACCCAACAAAAACAACA	ACAAAACACCACAAACCACCCCAAACCCCAACACAACAACCCAAAAACCCACAAACCCAAA	ACACCAACAAAAACCCAAACCCCAACAACCAAACAAC
61	20201014-D-1	D	Figure 2 / 5 cycles / 61	AAAACACACAAAAAAAAACACAAACAACAAAAAAAACCACAAAAAAAACAAAAAAAAACCAACACAAAAAAACAAAAACACACAAAACAACAACACACACAAAAAAAAAACCACAACACAACACAAAAAACC	CAACCCAAAACAAAAACCACCCAAACAACCAACCCCC	AAACACACCACCACACAAAAAACAACCACCACAACCACCACCACCAC
62	20201014-G-1	G	Figure 2 / 5 cycles / 62	AAAACAAAAACCAAACACCAAAAACAAAACAACCAAACAACA	CCACAACCACCAAACACCCCACAACACAC	CACCAACACACCCACAA

## Sheet: Paired x2
	Figure 4
	Male parent: SS00864-Gal4; Female Parent: UAS-CsChrimson
	Training protocol: Paired training; repeated 2x; retest larva next day
Number	Animal ID	Apparatus	File Path	Naive decision sequence	Post train decision sequence	Next day decision sequence
46	20201005-B-1	B	Figure 2 / 2 cycles / 46	AAACAAAAAAAAACAAACACAAAAACAAAAAAAACAAAACCAAAAA	CCCACACACAAACACCCACACACAACCAAACCCACCCACCACACAAACAAAACACCCCCACAAAA	AACAAAAAACACAAAAAACCAAAAAAAACACAAAAC
47	20201005-B-2	B	Figure 2 / 2 cycles / 47	AAAAAAACAAAACCAAAACACAAAAACAAACCAACAAACAAAAAAACACAAAAACAAAACAA	CCCCAACACCACCACAC	ACAAACCAAAACA
48	20201005-C-1	C	Figure 2 / 2 cycles / 48	AAAACAAAAAACAAACA	AAAACA	AAACAAAAAACAACAAACAA
49	20201005-C-2	C	Figure 2 / 2 cycles / 49	CAAAAAACAACACACAAAAAACAACCAAAC	CCCACACCCCACCAACACC	CAAAAAAACACAAACAAACCAACACAAAAAAACCACAACA
50	20201005-D-1	D	Figure 2 / 2 cycles / 50	AAAACAAAACAAAA	CACAACAAACCC	AAAAACAAACAAA
51	20201005-D-2	D	Figure 2 / 2 cycles / 51	AAAAAACACAAACACAAAAAAA	CACAAACAACCCAACACACCCAACAACACCCCCCCACACC	AAAAACAAACAAA
52	20201005-E-1	E	Figure 2 / 2 cycles / 52	AAAACAAACAAAAAAACACAAAAA	AAAAAACC	ACACAAAAAA
53	20201005-E-2	E	Figure 2 / 2 cycles / 53	AAAAAAAACAACAAAACAAACAAAAACAAACAAAAA	AAAAACAAACACCA	AAAACAAC
54	20201005-F-1	F	Figure 2 / 2 cycles / 54	AAAAACAAAAAACACAAAAAAACAAACAAAA	ACAACAAAAAACAAAACAAACCAAACAACAAAAAACAACACAAACAAAAAACAACA	AAAAAAACCAAACAA
55	20201005-F-2	F	Figure 2 / 2 cycles / 55	AAAAAAACAAAAACACAACAACACAAAAAAAAAAC	ACACAAAA	AAACAA
56	20201005-G-1	G	Figure 2 / 2 cycles / 56	AAAAAACACAAAAAAAAACACCAA	AACAA	AAAACA
57	20201005-G-2	G	Figure 2 / 2 cycles / 57	AAAAACAAAACAACACCAAACAAAACACAAAAAACAACAAAACAAAAAAAAACACACCAAAAA	CAACCAACCCACCACACACAACACCACCCAACCCCCCCA	AAAC
58	20201005-H-1	H	Figure 2 / 2 cycles / 58	AAAAAAACCAACCAAAACCCACAACA	AACACAACACCACAAAAACCCCCCCAACA	CAAAAC
59	20201005-H-2	H	Figure 2 / 2 cycles / 59	CAAAAAACAAACACAAACCAAAAAAAAAAAAAAACAAAAAAAAACACAAAAACCAACACACAAAAAAA	ACAAACACAACACAACCCACACACCCACAACCACACCACCCCCCCCCCAACCCAAACACACACC	AACA
60	20201006-B-1	B	Figure 2 / 2 cycles / 60	CAAAAACCAAAAAAAAACCACCAAAAAACAAACAACCCAAACAACCAAAACAACCAAAACAACAAAAAAAACAAAA	ACCACCAAACAAACCCACCCACCCCCACACACCAAACCCCCAACACCCCACAACACCCAAAC	AAACAAAACCACAAACCAAAAACC
61	20201006-B-2	B	Figure 2 / 2 cycles / 61	AAACAAAACAACAACACAAAAAAACAAAAACAAAAACAAAACACAAACACAACACCAAAACACAAAACCAAAAACACCACAACAAAAACAAAAAAACCCACAAAAACAACAAA	CACACACAACCACAAACCCCCCAAACACCCACAAACAACACAACCCCCAACACC	AAAAACAAACACCAAACAAAACACAACAACCCAA
62	20201006-C-1	C	Figure 2 / 2 cycles / 62	CAAAAAAACACAAACAACAACAAACACAAAA	AAAAAACACAAACAAACAC	ACCCAAAACAAAA
63	20201006-C-2	C	Figure 2 / 2 cycles / 63	CAAAAAACAAACAAACCAAACAAAAAAAACAACAAAAACAAAAAACAAAAACAACCAAAACAACCAAAACACCAACAAACAACAAACAAAAAACAAAA	CAAACAAACAAACAACAA	AAAACACA
64	20201006-D-1	D	Figure 2 / 2 cycles / 64	AAAAAAAAAACACAAAA	AACCACCACCCCCACACAACACA	ACAACACAAAACA
65	20201006-D-2	D	Figure 2 / 2 cycles / 65	ACAAAAAACAAAACCAAAAAAACCAAAAAAACACCAAAAAAACCAACCAAAACAAAAAACCAAAACCCAAACCACAAAAACAAAACAAAACCCAACAAAAAAAAAAACCACAAAACAACA	CCCCCAAACCAAACCACCCAACCACCA	AAAAACCAAACA
66	20201006-E-1	E	Figure 2 / 2 cycles / 66	CACAACCAAAAACAAAACAAAAAACAAAAAAAACAAAACAACCCACCACAACAACAAAAACAAAAAACAAACAACAAACCACCCAACAACAACCACAACCAAAAAAAAACAACAAAAA	ACACCACCAAAAAACAAAACCAACACCCAAAA	AACAAACCAA
67	20201006-E-2	E	Figure 2 / 2 cycles / 67	ACAAAACAAAACAACACAACAAAAAAACACCAAAACACAACAAAAACCAAA	AAAACA	AAAAACC
68	20201006-F-1	F	Figure 2 / 2 cycles / 68	CAAAAAACA	ACAAAA	AAAAACAAACCAA
69	20201006-G-1	G	Figure 2 / 2 cycles / 69	CACAAACACAACACAACAAAA	CACAACCACCCACACAACACAAAACACCAACCCAAACACAACAACCCCAACCCCCACCAA	CAAAACAAAACCACACAAAC
70	20201006-G-2	G	Figure 2 / 2 cycles / 70	AAAACACAAAAAAAACAAAAACAAACCAACAAAAAACCAACAAAACAAACAAACCAACAAAACCAAAACAAAACAACACACAAACAAAACCCAAACCAA	ACACAACACCCAACACCCAACAACACAACC	CAAAACAAAAC
71	20201006-H-1	H	Figure 2 / 2 cycles / 71	AAACAACAACAC	CACACAAACAAA	AAACAAACAACAAACCAAACAAA
72	20201007-B-1	B	Figure 2 / 2 cycles / 72	AACAAAACAAAAAAAACAACAAACAACAACAAAACAAACAACAAACA	CACAAACACAAACAAACAAACACACCAAACAACACAAACCAAAAAAACACACAACACACCACAAA	AAAAACCCAAAAACACACAAACAAC
73	20201007-B-2	B	Figure 2 / 2 cycles / 73	AACAAACACAAACACAAAAAAACAAAAAACCACAACACAACAACAAAACAACAAAAAAAA	ACAAACACCAAAAAAACAAAACCCAAAAACCACAAACAC	AACCAAACACAAAACACACAAACCAACCAAAAAACCAAAACAAA
74	20201007-C-1	C	Figure 2 / 2 cycles / 74	CACAAACAAACAAACAAACCAAAAAAACAACAAAACAAA	CAACACCACCACCAAAAACAACACCCCAAACACCCAAAAAAAAACACAACACCACAACACCCAACACCACAC	AACAAACAAAACCACAAACAA
75	20201007-C-2	C	Figure 2 / 2 cycles / 75	AAAACAAAAACAAAAACCAACAAAAAC	CACCCCCAACCACCAACACAACCAACCCCAACCCCCCA	AACAAACAAAAACAAAACCAA
76	20201007-E-1	E	Figure 2 / 2 cycles / 76	AAAAACCAAACAAACAACAACAA	CACACCCCCAAACACACCCAAACAACAAACCACAC	AAACCAACAACAAAAACAACC
77	20201007-E-2	E	Figure 2 / 2 cycles / 77	CAACAAAAAAAACACAAAACAAAAACACAAACAAAAACAAAAAAAC	CCACAACACCAACAACAC	CAAAACAACACAAACA
78	20201007-F-1	F	Figure 2 / 2 cycles / 78	AAAACCCAAACAACAAACAAAAACAAAAACACACACAAAACCAAAAACACAAAAAAAAAACAAAAACAAAAACA	ACACCAACCAAACCCACACCCAAC	ACAAACAAACACACAA
79	20201007-F-2	F	Figure 2 / 2 cycles / 79	AACAAACA	AAAACAACA	ACAAACAAAAACCACAAACAAAACACAACACAAAACAAAAACACACAA
80	20201007-G-1	G	Figure 2 / 2 cycles / 80	CCAAACAAAAAAACACAAAAAAAAAAAAACACCAAACCAAACAAACAAAACCAACAACAAACAAAAAAAAACACACA	AACACACCACACCAACCACCA	ACAAAACCAAAACAAAACCCAAAAAAC
81	20201007-G-2	G	Figure 2 / 2 cycles / 81	AAAAACACCAAACAACACACCAACAAAAAAAACAACCAAAAAACACAAAACCCA	CCCCCCAAACCCAACCCCCCACCCCCAAAAAACAAAAACA	AAACAACAACCAAAAAAA
82	20201007-H-1	H	Figure 2 / 2 cycles / 82	CAAAAAACAAAAACCAAAAAAA	CACAAAAAA	AAAACACAAACAACACAAACAAAA
83	20201008-B-1	B	Figure 2 / 2 cycles / 83	AAAAAACACAAACAACCAAAACCAAACAAAAAAAACACAACACAAAACAACAAAAAACAAACAAAAACAACACAACCAAAAACAAACAAAACAAACCAAAAAAACAAAAAACACACAAACACAACACCACAACAAAA	ACAAAACCAACCACACCAAAACAAACAACAAACAACAACAAAAAAAACAAACAACAAAAAAAAAACACCAAAACACACAACACAACAAACA	AAAAAACAAACCAAACAAAACAAAAAC
84	20201008-E-1	E	Figure 2 / 2 cycles / 84	AAACAAAC	CAAAACAACAAACACAAAACAAACAAAA	AACAAAAAA
85	20201008-F-1	F	Figure 2 / 2 cycles / 85	AAAAACAACAACAAACACAAAAAACACAAAAAACCAAAAAAAA	AAACCAAAAAC	AACAAAAAACAAAAAAACCAAAACCAA
86	20201008-G-1	G	Figure 2 / 2 cycles / 86	AACAAAAAAAAAAACCAACAACACAAAACACCAAACACAAACCAAAAAAAAAC	CAACCACAACCCACCCCCCACCA	AACAAAAAACAAAC
87	20201008-H-1	H	Figure 2 / 2 cycles / 87	AAAAAACCAACAAAACAAAACAAAAACACACAAAACAACAAACACAAACAAACACACAACACAAAAAAAC	ACCACAACCACACACCCAACCACCACCACAACC	AAAAAACCA

## Sheet: Paired x2, only test next day
	Figure 4
	Male parent: SS00864-Gal4; Female Parent: UAS-CsChrimson
	Training protocol: Paired training; repeated 2x; do not test larva immediately following training, but remove to food and test larva next day
Number	Animal ID	Apparatus	File Path	Naive decision sequence	Next day decision sequence
1	20201019-B-1-2	B	Figure 4 / Paired, x2 - Only Test Next Day / 1	AAAAAAAACCCAAAAAAAACAAAACAAAA	CAAACAACCAACAAAACA
2	20201019-B-2-2	B	Figure 4 / Paired, x2 - Only Test Next Day / 2	AAAAACAAAAAAAAACAAAACAACAAAAAACAAAACCAAAAACCAAAAAACA	AACCAACAAAAAACA
3	20201019-C-1-2	C	Figure 4 / Paired, x2 - Only Test Next Day / 3	AAAACAAAAAAACAAAAAAAACAAACCAAAACAAAAAAACAAAAACAACCAACCAAAAAAACACAACACCCAACA	AACAACAA
4	20201019-C-2-2	C	Figure 4 / Paired, x2 - Only Test Next Day / 4	AAAAAAAAACAACAAAAAACAACAAAACAAACCAAACAAAAACAAAAACAAAAAAAACACACAAAAACACCAACAACAACAAA	CCCAAACACACAACACACCAACCCCCAAC
5	20201019-D-1-2	D	Figure 4 / Paired, x2 - Only Test Next Day / 5	AAAACAAAAAACAAAAACCAAAAA	CAAACCACAAACAAACCAAACCCAACACAACCAC
6	20201019-D-2-2	D	Figure 4 / Paired, x2 - Only Test Next Day / 6	CAAAAACAAAAAAAAACAAAAAACACAAAAAACACACCAAAAACCACACACAACACAAACAAAAACACAAACAAAACAAAAAA	CAACCAAAA
7	20201019-E-1-2	E	Figure 4 / Paired, x2 - Only Test Next Day / 7	AAAACACAAACAAAAAACCAAAAAACCAACAAAAACAACA	AAACCCACCCCACAACCCACCAAACCAAAAAAA
8	20201019-E-2-2	E	Figure 4 / Paired, x2 - Only Test Next Day / 8	AAAAAAACAAAAAACAACAC	AAAC
9	20201019-F-1-2	F	Figure 4 / Paired, x2 - Only Test Next Day / 9	ACAAAAAAAAACCAAACCAAAAAAAAACACAAACAAAACACAAAA	AAAAA
10	20201019-F-2-2	F	Figure 4 / Paired, x2 - Only Test Next Day / 10	AAACAAACACAAAAACAAA	AACCCAAAAAA
11	20201019-G-1-2	G	Figure 4 / Paired, x2 - Only Test Next Day / 11	AAAAACAAACAAAAACCAAACAAAAAACAAACAACCCAACAAAAACAACAAAAAAAACACAAAAAAACCAAACCACAAACAAACCACA	ACCACCCCAAACCCCAACAAAACACCCCCCAACAAACCACACACACCCCAACCA
12	20201019-G-2-2	G	Figure 4 / Paired, x2 - Only Test Next Day / 12	AAAACACACAAAAAACAAAAAACAAAAAAACACAAACACAACAAAACAAAAACAAAAACCAAAAACCAAAACAAAAAAAACACAAAAACCACAAA	CCACCACCACCACAAACACCCCCCACCACACAAAAACCCACCACCCCCACCACAAC
13	20201019-H-1-2	H	Figure 4 / Paired, x2 - Only Test Next Day / 13	AAA	AACA
14	20201019-H-2-2	H	Figure 4 / Paired, x2 - Only Test Next Day / 14	AAACAAACAAAACACAAAAACACAACAAACAACCAAAACAACAAAACAAACAAAACAAA	AACCCAACACCCCACCAAACAACCA
15	20201020-B-1	B	Figure 4 / Paired, x2 - Only Test Next Day / 15	AACAAAAAAAAACAAACAAAAAACAACAAAAAAAACAACCAAACAAAAAAAAACCAAAAAACAAAAAAACCAAACCCCACAAAA	ACACACCACACAACACAACAACACCAACAACCCA
16	20201020-B-2	B	Figure 4 / Paired, x2 - Only Test Next Day / 16	CAAAAAAAC	ACCCCCAAACCCCCCACACACAAAAAAAAACA
17	20201020-C-1	C	Figure 4 / Paired, x2 - Only Test Next Day / 17	ACAAAACAAACAAA	AACAA
18	20201020-D-1	D	Figure 4 / Paired, x2 - Only Test Next Day / 18	CAAAACACAAAACAAACAACAAAA	CCAAAACAAAAACACAAAAAAA
19	20201020-E-1	E	Figure 4 / Paired, x2 - Only Test Next Day / 19	AACAAAACAAAACAAAAAAACAA	ACAACAAAAACACCAAACACACACAAACAAAAAAACAAACCAAAACAA
20	20201020-F-1	F	Figure 4 / Paired, x2 - Only Test Next Day / 20	AAAAACACACACAAAA	AAC
21	20201020-G-1	G	Figure 4 / Paired, x2 - Only Test Next Day / 21	CAAAAA	ACACCAAACC
22	20201020-H-1	H	Figure 4 / Paired, x2 - Only Test Next Day / 22	AAACAAACACAAAA	AACAAAAAAACACAAACCCCCAAAAACCACAACCAAA

## Sheet: No Training
	Figure 4
	Male parent: SS00864-Gal4; Female Parent: UAS-CsChrimson
	Training protocol: No training; retest larva next day
Number	Animal ID	Apparatus	File Path	Naive decision sequence	Post train decision sequence	Next day decision sequence
31	20201008-B-2	B	Figure 1 / No Training / 31	AAACAAAACAAAAAAAACAACAAAAACAAAAAAACAAAACAAAAAACAAAACACAAAACAAAAACCACAACCCAAAACAAAAAACACAAAACAAACAAACACCAAACACAACCAACACACACCCAAACAACACAACCACACAACCAA	AACCAAAAACAAAACAAAAAACAAAAAAAACAAAACACCAAAAAACCACAAAAACAACAACCAAAACACAAAAACAAACAAACAAACAAAAA	AAAACAACACAAAAAAAAAAACCAACCAACA
32	20201008-D-2	D	Figure 1 / No Training / 32	AACACAAAAACAAAACCAACAAAAAACCAAAAAACCAAAAAAACCAAAAAAACACACAAAAACCCAACAAACAAAAAACAACCAAAAAA	CAAACAAAAAACCAC	AAACACAAAAACAA
33	20201008-E-2	E	Figure 1 / No Training / 33	AACAAACAAAACAACAAAAAAAACACAAACAAAACAAAAAA	AAAAAACAAAAACCA	AAAAACAAAAAACCAAAACAA
34	20201008-F-2	F	Figure 1 / No Training / 34	AAAACAAAAACAAAAAACAAAAACCAAAAAACACAAAAACACCAAAACAAACAACAAAAAACAACCACAAAAAAACCAAAAACAACACAAAA	CAAACAAA	AACAAA
35	20201008-G-2	G	Figure 1 / No Training / 35	CAACCCAACAAACAAAAAAAAAAAACCAAAACAAAACACAAAAAAACACAAAACAAAA	AAAACAAACAAAAAACACACAAAAACAAACAAAAACCAAAACAAACAAAAAAAACACAAAACAAAAAAACAAAACAAAACAAAAACAACAAAAACAACAAAA	AACAAAACAAAACA
36	20201008-H-2	H	Figure 1 / No Training / 36	AACAAAACAAACAAAAAAAACCAAAAACAAAAAACAAACAACAAACACAAAAAAACAAACAAAAAAACACAAA	AACAAACAAAAAAACA	AAACACAAAAAAC
37	20201009-B-1	B	Figure 1 / No Training / 37	AAAAAAAACAACAAAAACCAAAAACAAAACCAACCCACAAAAACAACAAACACAAAACCACAAAAAACAAAACACAAACCCAAAAACACACACAAAAA	AAAAACCAAAAACAAACAAACAACAAAACAAAAACCAAAACAAAAACAACCAAAACACACAC	AACAAAAAACAAACAAACCAAAAACAAAC
38	20201009-C-1	C	Figure 1 / No Training / 38	CAAAAAACAACAAAAACAACAAACAAAAAACACAAAACAAAAC	ACAA	ACAAACAAAAAA
39	20201009-D-1	D	Figure 1 / No Training / 39	AAACAAAACAAACCAAAACAAACAACAAAACAAAACCAAAACAAAACACACACAAAAAAAACAAACAACA	ACAACAA	AAACAAAAAACACAAAAAAACCAAACA
40	20201009-E-1	E	Figure 1 / No Training / 40	CAAAAAAAACCAACACAAACCACACAAAAAAAACACAAAAAAACAACACCAAAAAAACACCAAAAAAAACCACACAAAAACCAAAAACCA	ACAAAAACAACACACACAAACAAAACAAACAAAAAAAACACA	CAAAAACAAACAACACAAAAAACAAAACACAAAACAAACAAA
41	20201009-F-1	F	Figure 1 / No Training / 41	AAAAAACAACAAAAACCAACCAAA	AAACAAAAAACACAAC	AAACCAAACAAAACCA
42	20201009-G-1	G	Figure 1 / No Training / 42	ACAAAA	CAAAACAAAACAACAC	ACAAAAAAACAAACAAAACAAC
43	20201009-H-1	H	Figure 1 / No Training / 43	AACAAAAAACAAACACAAAAAACCAAAACAAAAACAA	AAAC	AAACACAACAAACACAAAAAACACAA
44	20201010-B-1	B	Figure 1 / No Training / 44	AACAAAACCAAAAACACAACAAAAAAAAAACCAACCAAACAAACAACAAAAACACCACAAAAAAAAACAAAAAAACCCACCACA	CAACACAACCAAAAACAAACAAAACAAACAAACAACAAACACAAAAACAAACCAAACAACAACAACAACAACAAACAAAAAAAA	AAAAAAACAAACCACAAACAAAAAACACACAAACAAA
45	20201010-C-1	C	Figure 1 / No Training / 45	AACAAAACAAAAACAAAAACCACCACCAAAAAAA	AACAAACA	AAAAAAACACAAAAAAACAACACCAAAACAAAAAAA
46	20201010-D-1	D	Figure 1 / No Training / 46	AACAACCAAAAAAACAAAACACAAAACAACACAAAAAAACCACACCAAAACAAACCCACAAAC	AACAAAAAAACAAACCACAAAACCAACACAAAAAA	ACCAAACAAAACACCAAA
47	20201010-E-1	E	Figure 1 / No Training / 47	AAACAAACCAAACAAAACAAAAACACCAAACAAACCACAACCAACAACA	AACAAAAACAAAAACCACAAAACCAAACCCAAAAAACACAACCAAAACACAAAAAAAACACAAAAC	AAACAACCAAACAAAAAAACCAAAAA
48	20201010-F-1	F	Figure 1 / No Training / 48	AAAACACCAAAACAAACCACACCACAAAACAAAAAAAAAAAAAACCCAAAAAACAAAACAAAAAACCAAAAAAAAA	AACAAAAACACAAAAAAACAAAAACAACAAAAACCACAAACAAACACCAAAAAAAAAAACACCAAAACACCAACACAA	ACAACAAAAAACAAA
49	20201010-G-1	G	Figure 1 / No Training / 49	ACAAAAACAAAA	CAAAACAAACAACA	AACAAAACAAACACAACAAAACAA
50	20201010-H-1	H	Figure 1 / No Training / 50	AAAAACCAAAAAAACAACA	ACAAAACACAAAACAACAACAAAACAAAACCAAACAAAAAACAAACA	AAACAAACAACA

## Sheet: Reverse paired, x20
	Figure 4
	Male parent: SS00864-Gal4; Female Parent: UAS-CsChrimson
	Training protocol: Reverse paired training; repeated 20x; retest larva next day
Number	Animal ID	Apparatus	File Path	Naive decision sequence	Post train decision sequence	Next day decision sequence
9	20201014-B-2	B	Figure 1 / Reverse Paired / 9	CAAAAAAACAAAACAAACAACCACAAAAAAAAACAAAACCACCAAAACACAAACACAAAACACCAAC	AACAAAAAACAAAAAACCAAA	ACAAAAAAAAACACAAAAACAAAAACAAACAACAAACAA
10	20201014-D-2	D	Figure 1 / Reverse Paired / 10	CAAAAAAACAACCACAAAACAAAAAAAACCA	AACAACAAAAAAAACCCAAACAAAAAAAACAACAAAAAACAAAACCAAAAACAC	CAAACAAAACAAAAACAACACA
11	20201014-F-2	F	Figure 1 / Reverse Paired / 11	CAAAACAAACAAAAACAAACAAA	AAACAAACA	CAACAAACAAAAAA
12	20201014-G-2	G	Figure 1 / Reverse Paired / 12	AAAAAACAACAACAACACAACAACAAAAACAA	AAAAC	ACAAAAAACACCAAAAAAACACA
13	20201015-B-1	B	Figure 1 / Reverse Paired / 13	AAAAACAAAAACAAAAAAACAAAAAAAAACAACACCAAAAACCAAAAAAAAAACCAAAAACAACCAACCACCCCCAAACCAACCCACAAACCAACACAACCAACAACAACAAAAAAAACAACACAAACAAAA	AACAACAAAAACAAA	CAACAAAACACAAAA
14	20201015-B-2	B	Figure 1 / Reverse Paired / 14	AAAAAAACCAAAACAAAAACACAAAAACCAACAAACAAACACACAAAAA	AAACAAAAAAAAAAACCACAAAAAACACAA	AAACAAAAAAACAACAACAAAAAACAAAAAACAACAACACACAAA
15	20201015-C-1	C	Figure 1 / Reverse Paired / 15	AAAAAAACCAACAAAACACCAAAAAACAACAAAACAAAAAAAACACAAACAAA	CAAACAAAAAACACAACAACAAAA	AAAAAACACAACAA
16	20201015-C-2	C	Figure 1 / Reverse Paired / 16	AAACAAAAAACAAACAAAACACAAAAAAAA	AAAC	AAACACAAAAACAAAAAACACCAACAACAA
17	20201015-C-2	C	Figure 1 / Reverse Paired / 17	CAAACAAAAAACAACAAAAAACAAAAAACAACAAAAAAACAAACACAAA	AAAAACAAAAACCAACAAAACCAAAAAAAAA	AAAACCACAAAAAAAAAAACCA
18	20201015-D-1	D	Figure 1 / Reverse Paired / 18	CAAAAAAAACAACAACACAAAAAAAAAACAAAAA	CAAAAAACAAAA	AAACACAAAAAACAACAAA
19	20201015-D-2	D	Figure 1 / Reverse Paired / 19	AAAAACACAAACACAAAACACAAAAAAAACAAAAAAACCCCCAAAACAACAAAAAACAAACACA	AAAAAAAACAAACACAAAAACACCAAAAACAAAAAAAACAAAAAACAAAACACAAAAAAAA	AACAAAACACAAAAAAACCAACAAAA
20	20201015-E-1	E	Figure 1 / Reverse Paired / 20	ACAAAAAACAACAAAACAAAAACCACACAA	CAACAAACAACAAAAAAAAAAACCAAAAACAAAAAAAACCAAACCAACAAAC	CCACAAAAAACAAACAAAA
21	20201015-E-2	E	Figure 1 / Reverse Paired / 21	AAAAACAAAACAACAAACAAAAAACAAAAAAACAAAAAACACAACAAAAAACAACACCAACAAAAAAAA	AAAAACAAACAAACACCAAAACCAACAAAAACACAAAAAAAAAAA	AAAACAAAAAAACACCAACAAAACAAAAACAAA
22	20201015-E-2	E	Figure 1 / Reverse Paired / 22	AAAAAACCAAAAAAAAACACAAAAACAAAACAACACAAAAAAAAACAAAAAACACAAAAAAACAAAAACACCAAAAAAAAAAAAACAAAAAAACC	AAAAACAAACAAAAAAACAAAAAAACCAAAAAACACCCACAAACCAAACCCAAAAAACAACAACC	AAACACAAACCAAAACCAAAAAAAAAAACACC
23	20201015-F-1	F	Figure 1 / Reverse Paired / 23	AAAAAAACAAAAAAACACACAACAAAAAAAAAAACAAAAACAAAACC	AA	AAAAAC
24	20201015-F-2	F	Figure 1 / Reverse Paired / 24	CAAAAAACAAAAAAACAAAAAAACACAACAAAAACAA	AAC	AAACAAAACAAAAAAACAACACAC
25	20201015-G-1	G	Figure 1 / Reverse Paired / 25	CAAAACAAAAAAAACAAAACAAAAACACAAACAACAAAAAAAACAAAAAAACACCACAAACAAAAAAAACACACCAAAAAACCAAAAAACAAAAAACAAAAAAACCACCAA	AACCAAAACCAAAAACAACAAAAACAA	ACCAAAAAAAACA
26	20201015-G-2	G	Figure 1 / Reverse Paired / 26	AAAACAAAACCAAAAAACAACAAAAACAAAAAAAACAAACAAAAAAAACCACC	CAAAAACACAAAA	ACAAAAAACCAAAAACAACAA
27	20201015-H-1	H	Figure 1 / Reverse Paired / 27	AAAACCAAAAAAAAACAACAACAAACAAAAAA	AA	AAAAACCAAAAAAA
28	20201015-H-2	H	Figure 1 / Reverse Paired / 28	AAAAAAAACAAACACAAAAAAAACACAAACAAA	AAAAAAACCAAAACCA	AACAAAAAACA
29	20201015-H-2	H	Figure 1 / Reverse Paired / 29	AAAACACAAAACCACACAAAAAAACAAAACAACAAAAAACAAAAAACACAAAACCACACCACAAAAAAAAACAACCCCAACAAAAAAACAACAACACACAACAAAAACCAAAACAA	AAAAACAAAAAAAAACAAAAAAACAAAAAAACAACACAAAAAAAAACAAAACACAAAAAA	AAAACAAAACAAAACAAAACAAACACAA

## Sheet: Extinction Post-Training
	Figure 4
	Male parent: SS00864-Gal4; Female Parent: UAS-CsChrimson
	Training protocol: 3 cycles of training, followed by 18 extinction cycles; do not retest larva immediately after, but remove to food and retest next day
Number	Animal ID	Apparatus	File Path	Naive decision sequence		Next day decision sequence
1	20201209-B-1	B	Figure 4 / Extinction Post-Training / 1	ACAAAAACAAAAAACAAAACCACAAAACAACAAAAAAACCAAACAAAACAACCAAAAAACAACCAACACAAAAA		AACAAACAAACACCAAAAAACACCAAA
2	20201209-B-2	B	Figure 4 / Extinction Post-Training / 2	ACACAAAAAACAACAAAACAAACACACACAAAAACAAAAACACACCACCAAAA		AAACCACAAAAACAAACACAAAACCCAAACAAAACCAAAACAAAAACACAAAACCACCACAC
3	20201209-B-3	B	Figure 4 / Extinction Post-Training / 3	AAACAAACAAACCAACAAACACCAAAAAACCAACCAAACAAAA		AAAACACAACAACAAAAAAAACCACAAAACCACACACAAAACACAACAAAAAAACCAAAACAACAAAACAC
4	20201209-C-1	C	Figure 4 / Extinction Post-Training / 4	AAACAACAAAACACAAAACCAAACAAAAAACAACAAACAACAACCCAAAACACAAAAA		AAACAAACAAACAAAACAAACAAACAAACAAAAC
5	20201209-C-2	C	Figure 4 / Extinction Post-Training / 5	AACCCAAAAACAACAA		AACA
6	20201209-C-3	C	Figure 4 / Extinction Post-Training / 6	AAAAC
7	20201209-D-1	D	Figure 4 / Extinction Post-Training / 7	CAAAACACAAACAAAACCAAAAAACACAAACCAA		ACACAAACACAAAAACACA
8	20201209-D-2	D	Figure 4 / Extinction Post-Training / 8	ACAACAAACCAAAACAAAACCCAAAAACAAAAAAC		AAAAAACAACACAAAAACAACAA
9	20201209-D-3	D	Figure 4 / Extinction Post-Training / 9	CAAAACACACAAA		AACAC
10	20201209-E-1	E	Figure 4 / Extinction Post-Training / 10	AAAAAAAACAAACACAC		CACCAAAACAAAAACCAAA
11	20201209-E-2	E	Figure 4 / Extinction Post-Training / 11	AACAA		AAACACAACAACA
12	20201209-E-3	E	Figure 4 / Extinction Post-Training / 12	ACACAAAACAAAACAAACAAAAACAA		AAACAAACCAACAAAAAACCCAAAAAACACAACAACCAAACAAAAAACCC
13	20201209-F-1	F	Figure 4 / Extinction Post-Training / 13	CAACACAAACCAAAAAAA		AAC
14	20201209-F-2	F	Figure 4 / Extinction Post-Training / 14	CAAAAAAAAACACACAAAACAAAC		AAAACAAAC
15	20201209-G-1	G	Figure 4 / Extinction Post-Training / 15	CACAAAACAAACCAAACAACAAAAAAAC		AAAAACA
16	20201209-G-2	G	Figure 4 / Extinction Post-Training / 16	AAAAAACAC		AACCCAAAAAAACAAACCACAAACAACAC
17	20201209-G-3	G	Figure 4 / Extinction Post-Training / 17	AAC		ACAAACACCAAAAAAACAACA
18	20201209-H-1	H	Figure 4 / Extinction Post-Training / 18	AACACCAAAAAAAACACAACACACAAACACAAAAACCAAAACAAAAC		AAACAACAACCACCAAAC
19	20201209-H-2	H	Figure 4 / Extinction Post-Training / 19	AAAAAAAACCA		ACAACAAAAAAAACCAAA
20	20201209-H-3	H	Figure 4 / Extinction Post-Training / 20	CAAA		ACCAAACACAACAAAAAAACAACACCAAAACC
21	20201209-N-1	N	Figure 4 / Extinction Post-Training / 21	AAACACAACAACACAAAAAAACAAACAAAAACAAAAACACAAACAAACCAAA		AACAAAACCAAAAAACAACCAAAAAC
22	20201209-N-2	N	Figure 4 / Extinction Post-Training / 22	AAAAAACAAAACCAAAACCACAAACAAACAAAAAAAAACACAACCCAACCAAACAAAAAACACAACAC		ACAAC
23	20201209-N-3	N	Figure 4 / Extinction Post-Training / 23	CAAACAAAACAAAAC		AAACAAAACCACAACAAACACAAAAACC

## Sheet: Extinction Pre-Testing
	Figure 4
	Male parent: SS00864-Gal4; Female Parent: UAS-CsChrimson
	Training protocol: 3 cycles of training; do not retest larva immediately after, but remove to food; prior to retest next day, present 18 extinction cycles then test
Number	Animal ID	Apparatus	File Path	Naive decision sequence		Next day decision sequence
1	20201120-B-1	B	Figure 4 / Extinction Pre-Testing / 1	AAAAACACCAAAACAACAACCCAAACACAAACCAAAAAAACAACCCAAAAAAACAACCAAACCAAA		AACCCAAAACCAAAACAAAAACAACCACCAACCAAAAAAACACCCAACCCCAAACAACC
2	20201120-B-2	B	Figure 4 / Extinction Pre-Testing / 2	CAAACAAAAAAAAAAACCCACACACACAAAAAAAAAAAACCACAAAAAACAAAAAAACACCAACCCAAACCAACCACAAAAAAAACACAACCACAAAAAAAA		CCAAAAAAACACACA
3	20201120-B-3	B	Figure 4 / Extinction Pre-Testing / 3	ACACAACAAAA		ACACACCACAACACCAACCAACCCAACACCACACA
4	20201120-B-4	B	Figure 4 / Extinction Pre-Testing / 4	AAACAAAACCCAAACACACCAAAAAAAAAAAACCAACAAAAAAAAAACAACCCAAAAACCCAAACAAAACACCCAAACCAAACCAAACCAACCAAACAACACAAAACACCAAACACAA		AACCACCCAACAACCAACCCACAACCACCACAACAAAAAAAA
5	20201120-C-1	C	Figure 4 / Extinction Pre-Testing / 5	CCAAAAAAACCAAAAACAAACA		ACAACACACAAACACCCAACCCAACCACACAACCAACCCCAAAAACCAAACACAAACCAA
6	20201120-C-2	C	Figure 4 / Extinction Pre-Testing / 6	ACCAAAAAAAACCAACCAAAACAAAACAAACCACACAAAACAAAAA		AACAA
7	20201120-C-3	C	Figure 4 / Extinction Pre-Testing / 7	CAAACAAAACAACACAAAAACCAACCAAACAAACAACAACCAAACACCAAAAAACACCAAAACAAAACCAACCAAACACAA		CCAAC
8	20201120-C-4	C	Figure 4 / Extinction Pre-Testing / 8	ACCAAAACACACAAAAACCAACAAAACCCAAAACAAAAAACCAA		CCCACCACACCC
9	20201120-D-1	D	Figure 4 / Extinction Pre-Testing / 9	AAACCAACAAAAAACACACAACAAAACAAACCCAACCACACACAAAACAAAAAACCAAAACCAAAAAAAACCAACAAAAACCACAAAAAAAAAAACACAACCCAACCAAAACCAAAAACCAACAACAAAACA		ACACCCACAACCAACAAAAACCA
10	20201120-D-2	D	Figure 4 / Extinction Pre-Testing / 10	AAAACAAAAAACC		ACCACACAACCAACAACCCCCAACA
11	20201120-D-3	D	Figure 4 / Extinction Pre-Testing / 11	ACCCAAAAAACCAAAAAACCAAAAACACAAAACAACACAAAACAAACAAAAAACCACAAAACCAAAC		CCACCAAACACCCACACACAACACAACCC
12	20201120-D-4	D	Figure 4 / Extinction Pre-Testing / 12	CAAACAAACACAACCAACAAAACACCAAA		CACCAAAAAAAAACAAACA
13	20201120-E-1	E	Figure 4 / Extinction Pre-Testing / 13	ACAAAA		AACACAAAAAACCAC
14	20201120-E-2	E	Figure 4 / Extinction Pre-Testing / 14	AAACCAAAAAACACACAAAAAC		CCAACCACACCAACAC
15	20201120-E-3	E	Figure 4 / Extinction Pre-Testing / 15	CAAAACA		CCACAACCACCACAACACACACAACCAACCAACCACCCAAAACAA
16	20201120-F-1	F	Figure 4 / Extinction Pre-Testing / 16	AAAACACAAACAAACAACAA		CACACA
17	20201120-F-2	F	Figure 4 / Extinction Pre-Testing / 17	AACAACAAAAACCAAAACAAAAAACAAACCCACAAAAAACCACAAACAAAACACA		CAAACCCAAAAAAAACACACCCACACACCCCCCCAAACCAACC
18	20201120-F-3	F	Figure 4 / Extinction Pre-Testing / 18	ACACAAAAAAAAAACACACAAACAAAAACACACACCACAAAAACA		CAACACCACCCCACA
19	20201120-F-4	F	Figure 4 / Extinction Pre-Testing / 19	ACAAACCAAACAAAAACAACAC		CAAAAAC
20	20201120-G-1	G	Figure 4 / Extinction Pre-Testing / 20	AAACAAAACAAACACACAAAAACCAAACACACAAAACAAAAAACCAAACACAACAAAAAAACCACAAACCAAACACAACAAACACAAACAA		CAACCCAACCCCCACACACAAAACACCAA
21	20201120-G-2	G	Figure 4 / Extinction Pre-Testing / 21	AAAAAACCAAAC		CACCAACAACACCAAAAAAAACAA
22	20201120-G-3	G	Figure 4 / Extinction Pre-Testing / 22	AAAACCAAACAAACAAAACCACAAAACAACCAAACACAAACAAAACAACAAACA		CCCCACACAACACCCAA
23	20201120-G-4	G	Figure 4 / Extinction Pre-Testing / 23	ACAACACCAAAAAACCAAAAAAACAACCAACAAAAACCAAAACCCAAAAAAAA		CCCAACACCAACACCC
24	20201120-H-1	H	Figure 4 / Extinction Pre-Testing / 24	AAACAAAAAAAAAACCAAAACAAAAAACCACAACCAAAAAAACAAACAAAAACA		ACA
25	20201120-H-2	H	Figure 4 / Extinction Pre-Testing / 25	AAAAACACAAA		CACACCAA
26	20201120-H-3	H	Figure 4 / Extinction Pre-Testing / 26	AAACAAAACACAAAAAACA		CACAAACAAACAAAAAACACACC
27	20201120-H-4	H	Figure 4 / Extinction Pre-Testing / 27	ACAAAAA		CCACCAACACCCCCACAACCCACAAAAA
28	20201120-N-1	N	Figure 4 / Extinction Pre-Testing / 28	ACCAAAACACAACCAACAAACAAAAAAAAACCCAAAAAAAACACACAAACAAAAACACAAAAAAAAAACACACCAAAACA		ACAAAAAACACAAACACCACAACC
29	20201120-N-2	N	Figure 4 / Extinction Pre-Testing / 29	AAACCAAACAAACAAAAACAAACAACACAAAAACACCAA		AAACAAAAAAAAACCCAACACACCACACCAA
30	20201120-N-3	N	Figure 4 / Extinction Pre-Testing / 30	AACCAAAAAAAACACAAACAAAACCAACAAAAACAAAACCAAAACAAAACACAAACC		ACACACCCCCCCAACCACCACAAAAAAACAAACCCCACACAACAAACACCCCAACCCCCCCAA
31	20201120-N-4	N	Figure 4 / Extinction Pre-Testing / 31	ACCAAAAAACCAACAAACACAACAACCAAAACAC		CACACCACCAACAACCAACACCACACACAAAACACCCCCAACACCAAACACACCACACCCCCACCACACAAC

## Sheet: M x20, CXM+ATR+
	Figure 4
	Male parent: SS00864-Gal4; Female Parent: UAS-CsChrimson
	Training protocol: Paired training; repeated 20x; retest larva next day
	Feeding protocol: larvae were raised on regular food; 4 hours prior to experiments, larvae were fed ATR/CXM supplemented yeast paste
Number	Animal ID	Apparatus	File Path	Naive decision sequence	Post train decision sequence	Next day decision sequence
1	20210127-B-1	B	Figure 4 / M x20, CXM+;ATR+ / 1	AACCAAAAACAACAAACAACAACCAAACAACAAACAAC	AACACCACACCACAAAAACCACCACCACACAAACACCCCCCCACCCACCACAAAAAACACCAAAAAA	ACACAACCCCCCCAACAACAAAAAACCCAAACACACCCCCACCCAACAC
2	20210127-C-1	C	Figure 4 / M x20, CXM+;ATR+ / 2	ACAAACAAACAAACACAAAAAACA	CAAACCAACAAAAACAAAAC	ACAAACAAAC
3	20210127-D-1	D	Figure 4 / M x20, CXM+;ATR+ / 3	CAAAAAAACAA	ACACCAAAACCCCAAC	ACAACCAACCCACACAACAACACAAAA
4	20210127-F-1	F	Figure 4 / M x20, CXM+;ATR+ / 4	AACAA	CCACACCAACCACCCACACACCAAACACACAAACCACCAACACAAACCCACCACAACCCAACACCCAC	ACCAACCAACAACAACAACAAACAAACCCAAACCAAACAAACCCCAACCCCACCAAACCAACCACCCAAAAAAAC
5	20210127-G-1	G	Figure 4 / M x20, CXM+;ATR+ / 5	AACA	CCAAACCA	ACCCAACAAAACCAACA
6	20210127-H-1	H	Figure 4 / M x20, CXM+;ATR+ / 6	AAAAACACA	CAACCAA	AAC
7	20210127-N-1	N	Figure 4 / M x20, CXM+;ATR+ / 7	AAAAC	ACCCACAA	AAAAACACCAAACCCCAACCC
8	20210128-B-1	B	Figure 4 / M x20, CXM+;ATR+ / 8	AACA	CAACACCAACAACACAAACAC	CACAAAAACCAACAACACCACCCACCAAAACAAACAACCAAACACACCACACAC
9	20210128-D-1	D	Figure 4 / M x20, CXM+;ATR+ / 9	AAAC	CCACCCAACCAACCCCCCAAAC	ACACAACAACC
10	20210128-E-1	E	Figure 4 / M x20, CXM+;ATR+ / 10	AAACCA	CCCCACCAACACACAAACCCCACCACAA	CAAACCCC
11	20210128-F-1	F	Figure 4 / M x20, CXM+;ATR+ / 11	AAACAAAAC	ACCCACAAA	AAAAAACACAACCAACAACAAAACCCACCCAACCC
12	20210128-G-1	G	Figure 4 / M x20, CXM+;ATR+ / 12	CACCAAACAAAAAAACACCAAACAAAAACCAAA	AACAACCCAAAACACCACACCCCCCC	CAACAC
13	20210128-N-1	N	Figure 4 / M x20, CXM+;ATR+ / 13	AAACACACAAAAACACCAAACACAAA	ACACACACACCCACCAAAAAAACACCCCCAACC	ACAACCAACCCCCAAACAACAAAACCAC
14	20210129-B-1	B	Figure 4 / M x20, CXM+;ATR+ / 14	CAAACACCAAAACACCAAAACACAAAAAAAAACAAACCA	AACACCCCCCAAAACCACCAACACACCAACCCCAACACACAAACAAAACCACCCCACCCAAACCAACACA	ACCCCCAAACCAACAACCACACAAAACAACACAAAACAACACACAACCCAC
15	20210129-D-1	D	Figure 4 / M x20, CXM+;ATR+ / 15	AACAACAAAACCA	AACACACCC	AACAAAACCAAA
16	20210129-E-1	E	Figure 4 / M x20, CXM+;ATR+ / 16	AACAACACAA	AACCACAACACCAACCC	CCCACCAAAACCACCA
17	20210129-F-1	F	Figure 4 / M x20, CXM+;ATR+ / 17	AAACAACCAAAACACAAAACCAAACAAA	CACACCACA	CAAAAAACAAACCCCCACAACAC
18	20210129-G-1	G	Figure 4 / M x20, CXM+;ATR+ / 18	AAAACAACAAAAAAACAAAA	CCA	CAAACCCC
19	20210129-H-1	H	Figure 4 / M x20, CXM+;ATR+ / 19	AAACAAAACAACCAAAAAACAAA	ACAACCACCAAAACCCAAACACCAC	CACAACCCACCACACCACCAACCCCACACACCACACA
20	20210129-N-1	N	Figure 4 / M x20, CXM+;ATR+ / 20	CAAAACAAAACACCAACCAAAAAAAACCCAAAACCACAAAACCAAAACAAACACAAAAACAACACAACACACCAAAACAAA	ACCCACCCACACCCACCAACACA	CCCAAAACACCAACACAC

[truncated: 11 more sheets: M x20, CXM-ATR+, S x10, CXM+ATR+, S x10, CXM-ATR+, M x10, CXM+ATR+, M x10, CXM-ATR+, Creb only, heatshock, creb only, no heatshock, M x10, Creb, Heatshock, M x10, Creb, No Heatshock, S x10, Creb, Heatshock, S x10, Creb, No Heatshock]
